# Supplementary material for: Marine Prostanoids with Cytotoxic Activity from Octocoral Clavularia spp
Source: MDPI journal article supplement (doi:10.3390/md22050219), 2024-05-14
Supplement: s1 [file s1]

## Supplementary Materials

### Marine Prostanoids with Cytotoxic Activity from Octocoral *Clavularia* spp.

Ming-Ya Cheng <sup>1,†</sup>, I-Chi Hsu <sup>2,†</sup>, Shi-Ying Huang <sup>3,4</sup>, Ya-Ting Chuang <sup>5</sup>, Hsueh-Wei Chang <sup>5,6,7</sup>, Tian-Huei Chu <sup>8</sup>, Ching-Yeu Chen <sup>9</sup> and Yuan-Bin Cheng <sup>1,10,\*</sup>

#### Corresponding Author

**Yuan-Bin Cheng** – Department of Marine Biotechnology and Resources, National Sun Yat-sen University, Kaohsiung 80424, Taiwan; [orcid.org/0000-0001-6581-1320](https://orcid.org/0000-0001-6581-1320); E-mail: [jmb@mail.nsysu.edu.tw](mailto:jmb@mail.nsysu.edu.tw); Tel.: +886-7-5252-000-5212

#### Authors

**Ming-Ya Cheng** – Department of Marine Biotechnology and Resources, National Sun Yat-sen University, Kaohsiung 80424, Taiwan

**I-Chi Hsu** – Division of Pharmacy, Zuoying Branch of Kaohsiung Armed Forces General Hospital, Kaohsiung 813204, Taiwan

**Shi-Ying Huang** – College of Food and Biological Engineering, Jimei University, Xiamen 361021, China; Fujian Provincial Engineering Technology Research Center of Marine Functional Food, Xiamen 361021, China

**Ya-Ting Chuang** – Department of Biomedical Science and Environmental Biology, PhD program of Life Science, College of Life Science, Kaohsiung Medical University, Kaohsiung 80708, Taiwan

**Hsueh-Wei Chang** – Department of Biomedical Science and Environmental Biology, PhD program of Life Science, College of Life Science, Kaohsiung Medical University, Kaohsiung 80708, Taiwan; Center for Cancer Research, Kaohsiung Medical University, Kaohsiung 80708, Taiwan; Department of Medical Research, Kaohsiung Medical University Hospital, Kaohsiung 80708, Taiwan

**Tian-Huei Chu** – Medical Laboratory, Medical Education and Research Center, Kaohsiung Armed Forces General Hospital, Kaohsiung City, 802301

**Ching-Yeu Chen** – Department of Physical Therapy, Tzu-Hui Institute of Technology, Pingtung 926001, Taiwan

## Content

|                                                                                                                                                                                                                                   |    |
|-----------------------------------------------------------------------------------------------------------------------------------------------------------------------------------------------------------------------------------|----|
| Table S1. Energy analyses of 4 <i>R</i> ,12 <i>S</i> - <b>1</b> /4 <i>S</i> ,12 <i>R</i> - <b>1</b> (fourteen conformers).....                                                                                                    | 4  |
| Table S2. Cartesian coordinates of the low-energy re-optimized conformers of 4 <i>R</i> ,12 <i>S</i> - <b>1</b> /4 <i>S</i> ,12 <i>R</i> - <b>1</b> calculated at B3LYP/6-31G(d,p) level of theory. ....                          | 7  |
| Table S3. Energy analyses of 4 <i>S</i> ,12 <i>S</i> - <b>1</b> /4 <i>R</i> ,12 <i>R</i> - <b>1</b> (ten conformers).....                                                                                                         | 21 |
| Table S4. Cartesian coordinates of the low-energy re-optimized conformers of 4 <i>S</i> ,12 <i>S</i> - <b>1</b> /4 <i>R</i> ,12 <i>R</i> - <b>1</b> calculated at B3LYP/6-31G(d,p) level of theory. ....                          | 24 |
| Table S5. Experimental and calculated <sup>1</sup> H NMR data for compound <b>1</b> .....                                                                                                                                         | 34 |
| Table S6. Experimental and calculated <sup>13</sup> C NMR data for compound <b>1</b> . ....                                                                                                                                       | 35 |
| Table S7. DP4+ analyses of calculated and experimental NMR chemical shifts of <b>1</b> (unscaled). Isomer 1: 4 <i>R</i> ,12 <i>S</i> - <b>1</b> ; Isomer 2: 4 <i>S</i> ,12 <i>S</i> - <b>1</b> .....                              | 36 |
| Table S8. Energy analyses of 7 <i>S</i> ,8 <i>R</i> ,12 <i>R</i> - <b>2</b> /7 <i>R</i> ,8 <i>S</i> ,12 <i>S</i> - <b>2</b> (eleven conformers).....                                                                              | 37 |
| Table S9. Cartesian coordinates of the low-energy re-optimized conformers of 7 <i>S</i> ,8 <i>R</i> ,12 <i>R</i> - <b>2</b> /7 <i>R</i> ,8 <i>S</i> ,12 <i>S</i> - <b>2</b> calculated at B3LYP/6-31G(d,p) level of theory....    | 39 |
| Table S10. Energy analyses of 7 <i>S</i> ,8 <i>R</i> ,12 <i>S</i> - <b>2</b> /7 <i>R</i> ,8 <i>S</i> ,12 <i>R</i> - <b>2</b> (five conformers) .....                                                                              | 50 |
| Table S11. Cartesian coordinates of the low-energy re-optimized conformers of 7 <i>S</i> ,8 <i>R</i> ,12 <i>S</i> - <b>2</b> /7 <i>R</i> ,8 <i>S</i> ,12 <i>R</i> - <b>2</b> calculated at B3LYP/6-31G(d,p) level of theory. .... | 51 |
| Table S12. Experimental and calculated <sup>1</sup> H NMR data for compound <b>2</b> .....                                                                                                                                        | 56 |
| Table S13. Experimental and calculated <sup>13</sup> C NMR data for compound <b>2</b> . ....                                                                                                                                      | 57 |
| Table S14. DP4+ analyses of calculated and experimental NMR chemical shifts of <b>2</b> (unscaled). Isomer 1: 7 <i>S</i> ,8 <i>R</i> ,12 <i>R</i> - <b>2</b> ; Isomer 2: 7 <i>S</i> ,8 <i>R</i> ,12 <i>S</i> - <b>2</b> .....     | 58 |
| Table S15. <i>In silico</i> prediction of cytotoxicity of the compounds for human tumor cell lines. ....                                                                                                                          | 60 |
| Table S16. <i>In silico</i> prediction of the nitric oxide (NO) production inhibition activity of the compounds. ....                                                                                                             | 61 |
| Table S17. The <i>in silico</i> predicted water solubility of the compounds. ....                                                                                                                                                 | 62 |
| Table S18. The <i>in silico</i> predicted pharmacokinetics of the compounds. ....                                                                                                                                                 | 62 |
| Table S19. The <i>in silico</i> evaluation of the compounds for druglikeness.....                                                                                                                                                 | 63 |
| Table S20. The <i>in silico</i> evaluation of the compounds for medicinal chemistry. ....                                                                                                                                         | 64 |
| Figure S1. Experimental and Calculated ECD of <b>1</b> .....                                                                                                                                                                      | 65 |
| Figure S2. The predicted oral bioavailability of nine compounds. ....                                                                                                                                                             | 65 |
| Figure S3. <sup>1</sup> H NMR spectrum of <b>1</b> (600 MHz, CDCl <sub>3</sub> ) .....                                                                                                                                            | 66 |

|                                                                                       |    |
|---------------------------------------------------------------------------------------|----|
| Figure S4. $^{13}\text{C}$ NMR spectrum of <b>1</b> (125 MHz, $\text{CDCl}_3$ ) ..... | 66 |
| Figure S5. COSY spectrum of <b>1</b> .....                                            | 67 |
| Figure S6. HSQC spectrum of <b>1</b> .....                                            | 67 |
| Figure S7. HMBC spectrum of <b>1</b> .....                                            | 68 |
| Figure S8. NOESY spectrum of <b>1</b> .....                                           | 68 |
| Figure S9. HRESIMS spectrum of <b>1</b> .....                                         | 69 |
| Figure S10. UV spectrum of <b>1</b> .....                                             | 70 |
| Figure S11. IR spectrum of <b>1</b> .....                                             | 70 |
| Figure S12. $^1\text{H}$ NMR spectrum of <b>2</b> (600 MHz, $\text{CDCl}_3$ ) .....   | 71 |
| Figure S13. $^{13}\text{C}$ NMR spectrum of <b>2</b> (125 MHz, $\text{CDCl}_3$ )..... | 71 |
| Figure S14. COSY spectrum of <b>2</b> .....                                           | 72 |
| Figure S15. HSQC spectrum of <b>2</b> .....                                           | 72 |
| Figure S16. HMBC spectrum of <b>2</b> .....                                           | 73 |
| Figure S17. NOESY spectrum of <b>2</b> .....                                          | 73 |
| Figure S18. HRESIMS spectrum of <b>2</b> .....                                        | 74 |
| Figure S19. UV spectrum of <b>2</b> .....                                             | 75 |
| Figure S20. IR spectrum of <b>2</b> .....                                             | 75 |

Table S1. Energy analyses of 4*R*,12*S*-1/4*S*,12*R*-1 (fourteen conformers)

| NO. | 3D conformers<br>B3LYP/6-31G(d,p)                                                   | G (Hartree)  | Boltzmann<br>distribution | Calculated ECD spectrum                                                               |
|-----|-------------------------------------------------------------------------------------|--------------|---------------------------|---------------------------------------------------------------------------------------|
|     |                                                                                     |              |                           | 4 <i>R</i> ,12 <i>S</i> -1                                                            |
| 1   | 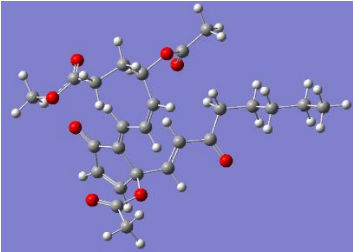   | -1573.243097 | 18.53 %                   |    |
| 2   |   | -1573.242279 | 7.79 %                    |   |
| 3   |  | -1573.240387 | 1.05 %                    |  |
| 4   |  | -1573.243648 | 33.21 %                   |  |

5

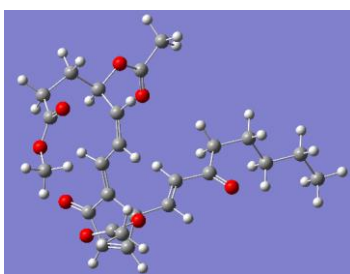

-1573.240860

1.73 %

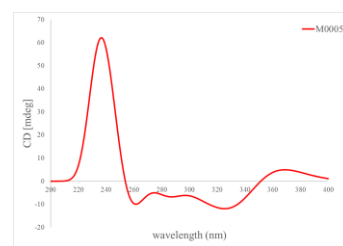

6

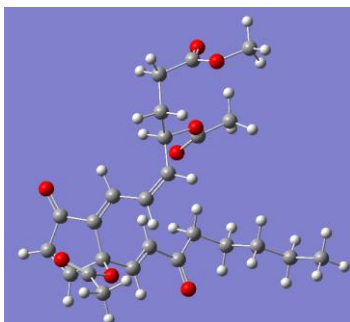

-1573.241282

2.71 %

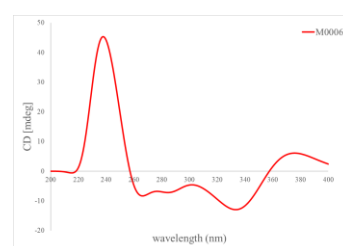

7

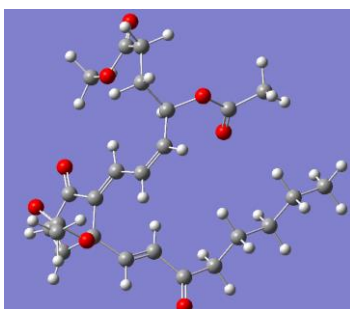

-1573.242657

11.63 %

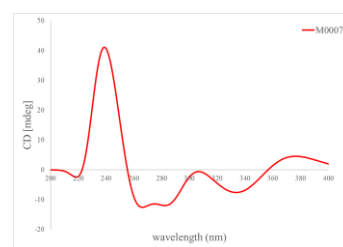

8

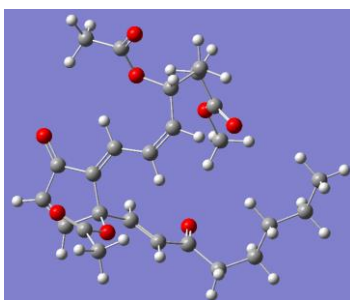

-1573.241846

4.93 %

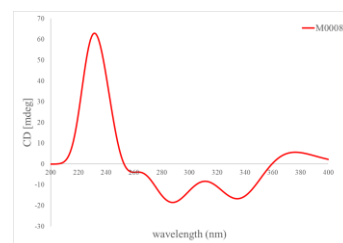

9

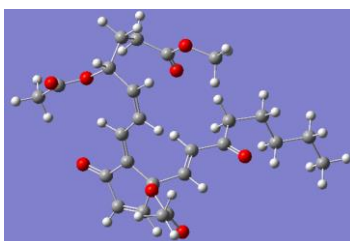

-1573.240792

1.61 %

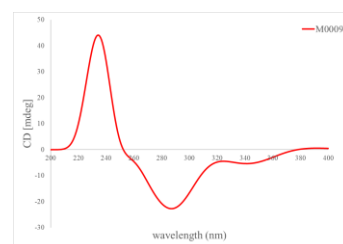

10

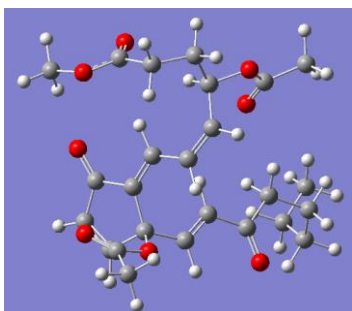

-1573.239958

0.67 %

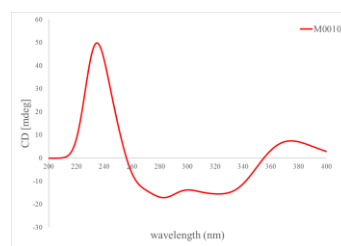

11

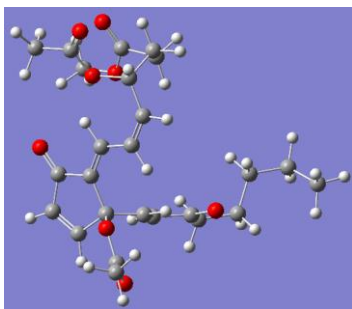

-1573.240849

1.71 %

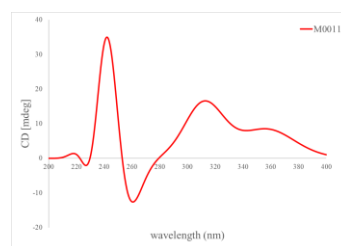

12

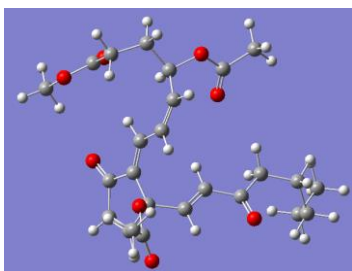

-1573.240968

1.94 %

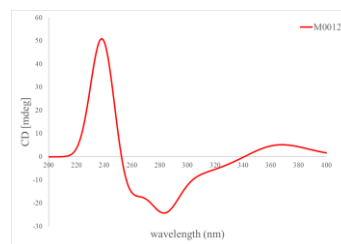

13

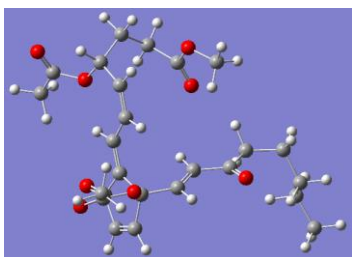

-1573.239961

0.67 %

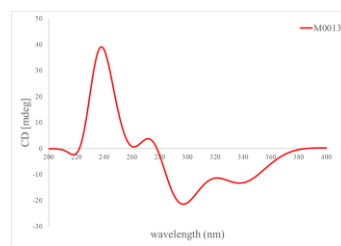

14

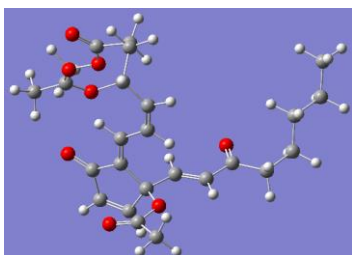

-1573.242638

11.4 %

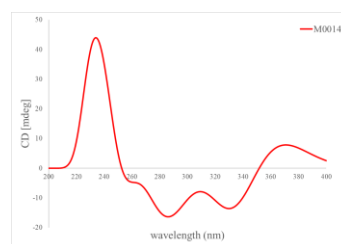

Table S2. Cartesian coordinates of the low-energy re-optimized conformers of 4*R*,12*S*-1/4*S*,12*R*-1 calculated at B3LYP/6-31G(d,p) level of theory.

| Conformer 1 |                           |         |         |             |                           |         |         |
|-------------|---------------------------|---------|---------|-------------|---------------------------|---------|---------|
| Atomic Type | Standard Orientation (Å ) |         |         | Atomic Type | Standard Orientation (Å ) |         |         |
|             | X                         | Y       | Z       |             | X                         | Y       | Z       |
| C           | -1.133                    | -3.757  | -1.0164 | H           | -0.7578                   | -4.7693 | -0.9036 |
| C           | -0.6894                   | -2.6582 | -0.0532 | H           | -2.3736                   | -3.8718 | -2.7963 |
| C           | -1.4742                   | -1.4556 | -0.5425 | H           | 1.36952                   | -3.3393 | 0.3506  |
| C           | -2.2508                   | -1.8671 | -1.7517 | H           | -2.0528                   | 0.51974 | -0.6661 |
| C           | -1.9483                   | -3.3045 | -1.9767 | H           | -0.4089                   | -0.4845 | 1.78584 |
| O           | -2.9916                   | -1.1606 | -2.4181 | H           | 1.01989                   | -0.7159 | -1.2075 |
| C           | 0.81798                   | -2.5282 | -0.1232 | H           | -0.0394                   | 1.7951  | 2.35781 |
| C           | -1.4702                   | -0.1899 | -0.0822 | H           | -1.1386                   | 2.50708 | -0.4286 |
| C           | -0.7785                   | 0.27955 | 1.10641 | H           | -1.7491                   | 3.96149 | 2.19498 |
| C           | 1.51177                   | -1.5581 | -0.7293 | H           | -2.1344                   | 4.52437 | 0.56486 |
| C           | -0.5547                   | 1.56947 | 1.42423 | H           | -3.3171                   | 1.99533 | 1.87642 |
| C           | -0.9025                   | 2.77838 | 0.59942 | H           | -4.125                    | 3.54291 | 1.75532 |
| C           | -2.0359                   | 3.63076 | 1.18953 | H           | 3.40045                   | -0.5878 | -2.5698 |
| C           | -3.3817                   | 2.90174 | 1.26441 | H           | 3.19127                   | 0.49955 | -1.2262 |
| C           | 3.008                     | -1.5825 | -0.7479 | H           | 5.61518                   | -1.3766 | -1.5422 |
| C           | 3.67375                   | -0.4469 | -1.5112 | H           | 5.59935                   | 0.28627 | -2.1274 |
| O           | 3.64369                   | -2.471  | -0.1982 | H           | 5.22337                   | 1.1037  | 0.22041 |
| C           | 5.19537                   | -0.381  | -1.3541 | H           | 5.25196                   | -0.5612 | 0.7975  |
| C           | 5.65328                   | 0.10873 | 0.02668 | H           | 7.6059                    | -0.8117 | -0.0271 |
| C           | 7.17899                   | 0.18267 | 0.16496 | H           | 7.58418                   | 0.84375 | -0.6149 |
| C           | 7.63705                   | 0.6765  | 1.54107 | H           | 8.73031                   | 0.71533 | 1.61038 |
| O           | -0.9218                   | -3.0267 | 1.34698 | H           | 7.25463                   | 1.68384 | 1.7489  |
| O           | -3.1768                   | -3.1888 | 1.08333 | H           | 7.27576                   | 0.01549 | 2.33845 |
| C           | -2.1923                   | -3.2679 | 1.7781  | H           | -3.192                    | -3.8705 | 3.5667  |
| C           | -2.1767                   | -3.6377 | 3.24401 | H           | -1.5219                   | -4.4985 | 3.41245 |
| C           | -3.9319                   | 2.5175  | -0.1002 | H           | -1.7814                   | -2.8062 | 3.83709 |
| O           | -3.4836                   | 2.89885 | -1.1633 | H           | -6.3949                   | 0.59721 | -0.9394 |
| O           | -4.9806                   | 1.68674 | 0.01689 | H           | -5.8282                   | 2.02745 | -1.8668 |
| C           | -5.5292                   | 1.19442 | -1.2261 | H           | -4.7895                   | 0.57789 | -1.7431 |
| O           | 0.25841                   | 3.66397 | 0.56924 | H           | 3.20139                   | 4.03294 | -0.8441 |
| O           | 1.28823                   | 2.30794 | -0.9293 | H           | 2.01627                   | 5.3165  | -0.4592 |
| C           | 1.2809                    | 3.30862 | -0.2441 | H           | 2.76921                   | 4.40648 | 0.85129 |
| C           | 2.39342                   | 4.32898 | -0.1743 |             |                           |         |         |

| Conformer 2 |                           |         |         |        |                           |         |         |
|-------------|---------------------------|---------|---------|--------|---------------------------|---------|---------|
| Atomic      | Standard Orientation (Å ) |         |         | Atomic | Standard Orientation (Å ) |         |         |
| Type        | X                         | Y       | Z       | Type   | X                         | Y       | Z       |
| C           | -0.8989                   | -3.2806 | 1.6654  | H      | -1.7084                   | -3.9976 | 1.71769 |
| C           | -0.6039                   | -2.555  | 0.35793 | H      | -0.1062                   | -3.2457 | 3.68715 |
| C           | 0.61684                   | -1.7123 | 0.71626 | H      | -1.783                    | -1.5109 | -1.2043 |
| C           | 0.88808                   | -1.8883 | 2.17177 | H      | 2.22836                   | -0.4522 | 0.46223 |
| C           | -0.0893                   | -2.8964 | 2.66087 | H      | 0.45818                   | -1.2129 | -1.9796 |
| O           | 1.74829                   | -1.3228 | 2.83231 | H      | -2.7279                   | -1.282  | 1.7025  |
| C           | -1.7556                   | -1.7079 | -0.134  | H      | 1.754                     | 0.19024 | -3.2949 |
| C           | 1.40898                   | -0.9384 | -0.0547 | H      | 3.99409                   | 0.79208 | -2.7031 |
| C           | 1.27187                   | -0.6966 | -1.4769 | H      | 3.85653                   | 3.0069  | -1.7719 |
| C           | -2.6933                   | -1.1302 | 0.62598 | H      | 2.53062                   | 2.73927 | -2.9033 |
| C           | 2.04025                   | 0.10418 | -2.2466 | H      | 1.63996                   | 3.95559 | -1.0249 |
| C           | 3.2381                    | 0.95461 | -1.9265 | H      | 0.97601                   | 2.32746 | -0.9061 |
| C           | 2.91519                   | 2.4672  | -1.9128 | H      | -5.3411                   | -0.5864 | 1.35073 |
| C           | 1.90229                   | 2.90455 | -0.8452 | H      | -4.2903                   | 0.72369 | 1.83131 |
| C           | -3.7344                   | -0.2569 | 0.00897 | H      | -6.1484                   | 0.86312 | -0.613  |
| C           | -4.7967                   | 0.28676 | 0.95704 | H      | -6.6292                   | 1.41156 | 0.99192 |
| O           | -3.7428                   | -0.0146 | -1.1896 | H      | -4.7507                   | 3.08285 | 0.9798  |
| C           | -5.7667                   | 1.28788 | 0.32323 | H      | -4.2837                   | 2.53567 | -0.6293 |
| C           | -5.1428                   | 2.66152 | 0.04119 | H      | -6.5209                   | 3.2336  | -1.5199 |
| C           | -6.1315                   | 3.65458 | -0.5823 | H      | -6.9994                   | 3.77125 | 0.08295 |
| C           | -5.5121                   | 5.02834 | -0.8586 | H      | -6.2408                   | 5.71406 | -1.3061 |
| O           | -0.1874                   | -3.483  | -0.6975 | H      | -5.1437                   | 5.49084 | 0.0656  |
| O           | -2.1915                   | -4.5515 | -0.6709 | H      | -4.6631                   | 4.94747 | -1.5485 |
| C           | -1.0774                   | -4.4181 | -1.1251 | H      | -1.1892                   | -6.012  | -2.5417 |
| C           | -0.4731                   | -5.2509 | -2.2308 | H      | -0.2141                   | -4.6137 | -3.0828 |
| C           | 2.45155                   | 2.83408 | 0.57085 | H      | 0.45144                   | -5.7235 | -1.8842 |
| O           | 3.56456                   | 3.19124 | 0.90095 | H      | 2.29665                   | 1.2176  | 2.96878 |
| O           | 1.52128                   | 2.35742 | 1.42038 | H      | 2.63981                   | 2.97793 | 3.07472 |
| C           | 1.89981                   | 2.22279 | 2.80549 | H      | 0.98162                   | 2.35353 | 3.38046 |
| O           | 3.82365                   | 0.56907 | -0.6668 | H      | 6.69456                   | 0.34675 | 0.90493 |
| O           | 5.88491                   | 1.10394 | -1.4469 | H      | 5.31252                   | 1.31159 | 1.49657 |
| C           | 5.17297                   | 0.74473 | -0.5375 | H      | 5.11722                   | -0.4328 | 1.26946 |
| C           | 5.61012                   | 0.45995 | 0.87448 |        |                           |         |         |



| Conformer 3 |                          |         |         |        |                          |         |         |
|-------------|--------------------------|---------|---------|--------|--------------------------|---------|---------|
| Atomic      | Standard Orientation (Å) |         |         | Atomic | Standard Orientation (Å) |         |         |
| Type        | X                        | Y       | Z       | Type   | X                        | Y       | Z       |
| C           | 0.41482                  | -3.7788 | 1.37924 | H      | -0.1363                  | -4.7127 | 1.42871 |
| C           | 0.20243                  | -2.816  | 0.21177 | H      | 1.54832                  | -3.7598 | 3.23236 |
| C           | 1.2211                   | -1.7286 | 0.49583 | H      | -1.9572                  | -3.1069 | -0.1449 |
| C           | 1.82273                  | -1.9986 | 1.83534 | H      | 2.32147                  | -0.0054 | 0.20152 |
| C           | 1.26572                  | -3.2973 | 2.29396 | H      | 0.35531                  | -1.0135 | -1.9888 |
| O           | 2.60294                  | -1.2781 | 2.44264 | H      | -1.0528                  | -0.4271 | 1.05237 |
| C           | -1.2452                  | -2.3693 | 0.22303 | H      | 0.72026                  | 0.95039 | -3.1742 |
| C           | 1.57027                  | -0.6521 | -0.2364 | H      | 2.65123                  | 2.34731 | -2.7802 |
| C           | 1.02868                  | -0.2908 | -1.5335 | H      | 1.80753                  | 4.15074 | -1.3902 |
| C           | -1.7171                  | -1.2027 | 0.67865 | H      | 0.55845                  | 3.52653 | -2.4651 |
| C           | 1.24716                  | 0.84834 | -2.2251 | H      | -0.4582                  | 3.97463 | -0.3209 |
| C           | 2.0509                   | 2.07714 | -1.9038 | H      | -0.4369                  | 2.22219 | -0.5226 |
| C           | 1.15292                  | 3.29369 | -1.5732 | H      | -3.3405                  | 0.37293 | 2.34849 |
| C           | 0.20103                  | 3.09867 | -0.3833 | H      | -2.9577                  | 1.20156 | 0.86305 |
| C           | -3.1857                  | -0.9238 | 0.68276 | H      | -5.6865                  | -0.1033 | 1.42279 |
| C           | -3.6044                  | 0.41454 | 1.27937 | H      | -5.3369                  | 1.58841 | 1.7746  |
| O           | -3.9972                  | -1.7312 | 0.254   | H      | -4.8562                  | 1.99074 | -0.6609 |
| C           | -5.0862                  | 0.75675 | 1.10257 | H      | -5.219                   | 0.30015 | -1.0044 |
| C           | -5.4667                  | 1.13404 | -0.3357 | H      | -7.5594                  | 0.62884 | -0.1695 |
| C           | -6.9515                  | 1.4853  | -0.4929 | H      | -7.2041                  | 2.31237 | 0.18633 |
| C           | -7.3316                  | 1.86802 | -1.9268 | H      | -8.3975                  | 2.10982 | -2.0078 |
| O           | 0.33367                  | -3.4674 | -1.0907 | H      | -6.765                   | 2.7437  | -2.2676 |
| O           | 2.46005                  | -4.1675 | -0.6835 | H      | -7.1221                  | 1.0473  | -2.6238 |
| C           | 1.50347                  | -4.0905 | -1.4154 | H      | 2.31039                  | -5.24   | -3.0238 |
| C           | 1.41724                  | -4.6496 | -2.8169 | H      | 0.52042                  | -5.266  | -2.931  |
| C           | 0.91452                  | 3.00198 | 0.95505 | H      | 1.34552                  | -3.8292 | -3.5394 |
| O           | 1.82547                  | 3.72141 | 1.3082  | H      | 0.20796                  | 1.35098 | 3.63235 |
| O           | 0.37362                  | 2.03384 | 1.7261  | H      | 1.83933                  | 1.17217 | 2.92518 |
| C           | 0.97443                  | 1.83305 | 3.02406 | H      | 1.27259                  | 2.78877 | 3.45779 |
| O           | 2.96009                  | 1.82833 | -0.8144 | H      | 4.92038                  | 1.25187 | 0.70687 |
| O           | 4.40711                  | 3.35738 | -1.6559 | H      | 5.86609                  | 2.74853 | 0.40555 |
| C           | 4.09991                  | 2.58169 | -0.7799 | H      | 4.32824                  | 2.80432 | 1.31434 |
| C           | 4.86562                  | 2.32252 | 0.48979 |        |                          |         |         |

| Conformer 4 |                          |         |         |        |                          |         |         |
|-------------|--------------------------|---------|---------|--------|--------------------------|---------|---------|
| Atomic      | Standard Orientation (Å) |         |         | Atomic | Standard Orientation (Å) |         |         |
| Type        | X                        | Y       | Z       | Type   | X                        | Y       | Z       |
| C           | -0.5509                  | -4.0707 | -1.2026 | H      | 0.02229                  | -4.9914 | -1.248  |
| C           | -0.2338                  | -3.015  | -0.146  | H      | -1.9123                  | -4.2388 | -2.8876 |
| C           | -1.291                   | -1.9595 | -0.4098 | H      | 1.95059                  | -3.2919 | -0.0134 |
| C           | -2.0737                  | -2.3757 | -1.6128 | H      | -2.2994                  | -0.1715 | -0.19   |
| C           | -1.5285                  | -3.6913 | -2.0348 | H      | -0.212                   | -1.0294 | 1.95624 |
| O           | -2.9756                  | -1.7504 | -2.1509 | H      | 0.9237                   | -0.6308 | -1.15   |
| C           | 1.20151                  | -2.5639 | -0.3222 | H      | -0.2273                  | 1.25021 | 2.69552 |
| C           | -1.5057                  | -0.7909 | 0.2235  | H      | -1.6046                  | 1.89781 | 0.04309 |
| C           | -0.7908                  | -0.3032 | 1.39135 | H      | -3.3982                  | 1.61981 | 1.84241 |
| C           | 1.62098                  | -1.4029 | -0.8376 | H      | -2.5933                  | 2.89251 | 2.75882 |
| C           | -0.7817                  | 0.98025 | 1.79773 | H      | -4.4252                  | 3.93297 | 1.55746 |
| C           | -1.4584                  | 2.12864 | 1.09775 | H      | -2.949                   | 4.48294 | 0.80231 |
| C           | -2.791                   | 2.52465 | 1.74456 | H      | 3.07102                  | 0.18032 | -2.6502 |
| C           | -3.5666                  | 3.59315 | 0.96432 | H      | 2.80724                  | 1.01158 | -1.1427 |
| C           | 3.08221                  | -1.1095 | -0.9768 | H      | 5.49671                  | -0.2637 | -1.9368 |
| C           | 3.42717                  | 0.23135 | -1.6082 | H      | 5.09495                  | 1.42234 | -2.2596 |
| O           | 3.9345                   | -1.91   | -0.6189 | H      | 4.82725                  | 1.82634 | 0.20702 |
| C           | 4.91535                  | 0.58947 | -1.5665 | H      | 5.2409                   | 0.1423  | 0.52136 |
| C           | 5.41803                  | 0.97672 | -0.1689 | H      | 7.49424                  | 0.49644 | -0.5179 |
| C           | 6.90633                  | 1.34652 | -0.1443 | H      | 7.08806                  | 2.17397 | -0.8455 |
| C           | 7.40755                  | 1.73925 | 1.24923 | H      | 8.47348                  | 1.99442 | 1.23545 |
| O           | -0.2365                  | -3.5704 | 1.21013 | H      | 6.86227                  | 2.60914 | 1.63666 |
| O           | -2.4215                  | -4.1988 | 1.10461 | H      | 7.27043                  | 0.91872 | 1.96421 |
| C           | -1.3771                  | -4.1298 | 1.70633 | H      | -2.037                   | -5.1229 | 3.47799 |
| C           | -1.1336                  | -4.6356 | 3.10994 | H      | -0.2953                  | -5.3394 | 3.12102 |
| C           | -4.1278                  | 3.19617 | -0.3959 | H      | -0.8684                  | -3.802  | 3.76878 |
| O           | -4.6424                  | 3.98214 | -1.1601 | H      | -4.2223                  | 0.38132 | -2.0083 |
| O           | -4.0074                  | 1.8743  | -0.6502 | H      | -5.6245                  | 1.50945 | -1.9182 |
| C           | -4.5348                  | 1.42125 | -1.9175 | H      | -4.1279                  | 2.02656 | -2.7306 |
| O           | -0.5979                  | 3.30469 | 1.17367 | H      | 2.10309                  | 4.61446 | -0.1681 |
| O           | 0.71597                  | 2.46281 | -0.4707 | H      | 0.61973                  | 5.48242 | 0.32606 |
| C           | 0.46021                  | 3.3398  | 0.32669 | H      | 1.60768                  | 4.68354 | 1.54999 |
| C           | 1.25426                  | 4.61057 | 0.51627 |        |                          |         |         |

| Conformer 5 |                          |         |         |        |                          |         |         |
|-------------|--------------------------|---------|---------|--------|--------------------------|---------|---------|
| Atomic      | Standard Orientation (Å) |         |         | Atomic | Standard Orientation (Å) |         |         |
| Type        | X                        | Y       | Z       | Type   | X                        | Y       | Z       |
| C           | 0.00029                  | -3.6393 | 1.02721 | H      | -0.4751                  | -4.5407 | 0.65351 |
| C           | 0.18184                  | -2.429  | 0.11428 | H      | 0.38181                  | -4.0944 | 3.11678 |
| C           | 0.92711                  | -1.4535 | 1.00443 | H      | -1.6491                  | -2.5962 | -1.1094 |
| C           | 1.03562                  | -2.0586 | 2.36815 | H      | 1.83281                  | 0.3059  | 1.57067 |
| C           | 0.43153                  | -3.4146 | 2.27418 | H      | 1.11987                  | -0.1995 | -1.4217 |
| O           | 1.51681                  | -1.5324 | 3.35772 | H      | -1.4174                  | -0.2073 | 0.80735 |
| C           | -1.1775                  | -1.9596 | -0.3621 | H      | 1.55193                  | 2.10061 | -1.8283 |
| C           | 1.38331                  | -0.2172 | 0.72928 | H      | 1.60654                  | 2.45319 | 1.23184 |
| C           | 1.34787                  | 0.43388 | -0.5679 | H      | 3.4106                   | 3.79288 | -0.8657 |
| C           | -1.8436                  | -0.8837 | 0.07184 | H      | 3.18798                  | 4.34425 | 0.7981  |
| C           | 1.57198                  | 1.74141 | -0.8007 | H      | 5.23605                  | 3.1113  | 0.77501 |
| C           | 1.80995                  | 2.81801 | 0.22236 | H      | 4.09096                  | 2.03979 | 1.57518 |
| C           | 3.20373                  | 3.45667 | 0.15594 | H      | -3.9228                  | 0.49564 | 1.24877 |
| C           | 4.32693                  | 2.51657 | 0.61899 | H      | -3.1593                  | 1.50601 | 0.05997 |
| C           | -3.2014                  | -0.5517 | -0.4613 | H      | -5.4982                  | 2.03861 | -0.1093 |
| C           | -3.8647                  | 0.66742 | 0.16192 | H      | -5.1785                  | 1.01467 | -1.5077 |
| O           | -3.7245                  | -1.2118 | -1.3479 | H      | -6.104                   | -0.9599 | -0.2749 |
| C           | -5.2412                  | 1.01438 | -0.4122 | H      | -6.4188                  | 0.05719 | 1.13002 |
| C           | -6.3605                  | 0.06169 | 0.03056 | H      | -7.9829                  | 1.46524 | -0.2508 |
| C           | -7.7322                  | 0.43542 | -0.5446 | H      | -7.6738                  | 0.43755 | -1.6422 |
| C           | -8.8515                  | -0.5097 | -0.0959 | H      | -9.8177                  | -0.2201 | -0.5252 |
| O           | 0.85798                  | -2.7916 | -1.1369 | H      | -8.6449                  | -1.5415 | -0.4054 |
| O           | 2.79603                  | -3.391  | -0.1058 | H      | -8.9585                  | -0.5078 | 0.99604 |
| C           | 2.13401                  | -3.2606 | -1.1095 | H      | 3.57645                  | -4.0535 | -2.4727 |
| C           | 2.59837                  | -3.5729 | -2.5143 | H      | 1.87918                  | -4.2238 | -3.0203 |
| C           | 4.68116                  | 1.45749 | -0.4121 | H      | 2.66808                  | -2.6483 | -3.098  |
| O           | 4.821                    | 1.67436 | -1.5976 | H      | 4.93138                  | -1.7471 | -0.1823 |
| O           | 4.84287                  | 0.25084 | 0.16467 | H      | 4.66477                  | -0.7529 | -1.6552 |
| C           | 5.20486                  | -0.8337 | -0.7096 | H      | 6.28051                  | -0.806  | -0.909  |
| O           | 0.88013                  | 3.913   | -0.0458 | H      | -2.2418                  | 4.83934 | 0.36672 |
| O           | -0.8262                  | 2.74554 | 0.889   | H      | -0.7708                  | 5.8604  | 0.30154 |
| C           | -0.4098                  | 3.73733 | 0.32877 | H      | -1.3088                  | 5.00813 | -1.1466 |
| C           | -1.2412                  | 4.93922 | -0.0552 |        |                          |         |         |

| Conformer 6 |                          |         |         |        |                          |         |         |
|-------------|--------------------------|---------|---------|--------|--------------------------|---------|---------|
| Atomic      | Standard Orientation (Å) |         |         | Atomic | Standard Orientation (Å) |         |         |
| Type        | X                        | Y       | Z       | Type   | X                        | Y       | Z       |
| C           | 4.5987                   | -1.2215 | -0.9099 | H      | 5.56908                  | -0.7939 | -0.678  |
| C           | 3.39818                  | -0.9431 | -0.0075 | H      | 4.94053                  | -2.2655 | -2.7839 |
| C           | 2.30344                  | -1.7694 | -0.6547 | H      | 3.86916                  | 1.12347 | 0.60808 |
| C           | 2.85428                  | -2.372  | -1.9095 | H      | 0.41347                  | -2.5241 | -0.966  |
| C           | 4.28223                  | -1.9644 | -1.9775 | H      | 1.08476                  | -1.0306 | 1.68672 |
| O           | 2.24033                  | -3.0534 | -2.7133 | H      | 1.42606                  | 0.69464 | -1.2041 |
| C           | 3.14964                  | 0.55083 | 0.0243  | H      | -1.2548                  | -0.8638 | 2.09073 |
| C           | 1.0188                   | -1.927  | -0.2863 | H      | -1.6342                  | -1.807  | -0.8176 |
| C           | 0.40608                  | -1.3874 | 0.91593 | H      | -2.2346                  | -3.6727 | 0.71363 |
| C           | 2.17921                  | 1.21231 | -0.6167 | H      | -3.2634                  | -2.6006 | 1.66268 |
| C           | -0.9166                  | -1.2779 | 1.14166 | H      | -3.7313                  | -3.1755 | -1.33   |
| C           | -2.0252                  | -1.617  | 0.18426 | H      | -4.4853                  | -4.081  | -0.0092 |
| C           | -2.8868                  | -2.7937 | 0.65237 | H      | 1.2587                   | 3.17555 | -2.4178 |
| C           | -4.0659                  | -3.1074 | -0.2909 | H      | 0.05469                  | 2.75353 | -1.2337 |
| C           | 2.08034                  | 2.70245 | -0.5299 | H      | 1.71904                  | 5.34442 | -1.1323 |
| C           | 0.9771                   | 3.3378  | -1.3645 | H      | 0.13597                  | 5.24314 | -1.9015 |
| O           | 2.85225                  | 3.36081 | 0.15293 | H      | -0.8861                  | 4.58787 | 0.30083 |
| C           | 0.75245                  | 4.82775 | -1.093  | H      | 0.69906                  | 4.70234 | 1.06255 |
| C           | 0.07956                  | 5.11508 | 0.25631 | H      | 0.81496                  | 7.13433 | 0.46621 |
| C           | -0.1501                  | 6.61025 | 0.50958 | H      | -0.7604                  | 7.02832 | -0.3041 |
| C           | -0.8259                  | 6.8978  | 1.85413 | H      | -0.9732                  | 7.97309 | 2.00763 |
| O           | 3.67453                  | -1.2612 | 1.39584 | H      | -1.8097                  | 6.41539 | 1.91525 |
| O           | 4.06039                  | -3.4633 | 0.96979 | H      | -0.2215                  | 6.52162 | 2.68869 |
| C           | 3.99576                  | -2.5398 | 1.74466 | H      | 4.55314                  | -3.6335 | 3.49226 |
| C           | 4.24652                  | -2.6195 | 3.23343 | H      | 5.02154                  | -1.905  | 3.52811 |
| C           | -5.1973                  | -2.0957 | -0.2446 | H      | 3.33562                  | -2.3576 | 3.78219 |
| O           | -5.6252                  | -1.4689 | -1.1901 | H      | -7.1136                  | -1.1724 | 2.19979 |
| O           | -5.7106                  | -2.0057 | 1.00356 | H      | -6.4499                  | -0.0546 | 0.96432 |
| C           | -6.7916                  | -1.0743 | 1.16259 | H      | -7.6108                  | -1.3139 | 0.47988 |
| O           | -2.9228                  | -0.4723 | 0.0926  | H      | -3.3829                  | 2.3607  | -1.5079 |
| O           | -1.5431                  | 0.54525 | -1.3915 | H      | -4.5947                  | 1.0739  | -1.2082 |
| C           | -2.582                   | 0.52257 | -0.7672 | H      | -3.8942                  | 1.95153 | 0.15828 |
| C           | -3.6812                  | 1.55273 | -0.8391 |        |                          |         |         |

| Conformer 7 |                          |         |         |        |                          |         |         |
|-------------|--------------------------|---------|---------|--------|--------------------------|---------|---------|
| Atomic      | Standard Orientation (Å) |         |         | Atomic | Standard Orientation (Å) |         |         |
| Type        | X                        | Y       | Z       | Type   | X                        | Y       | Z       |
| C           | -4.1155                  | -1.3668 | -1.1011 | H      | -4.8782                  | -2.1311 | -0.991  |
| C           | -3.0264                  | -1.2049 | -0.0427 | H      | -4.5706                  | -0.4683 | -3.0262 |
| C           | -2.2469                  | -0.0067 | -0.5545 | H      | -2.7625                  | -3.302  | 0.59106 |
| C           | -2.8148                  | 0.38317 | -1.8801 | H      | -0.8066                  | 1.47368 | -0.5675 |
| C           | -3.9605                  | -0.5277 | -2.1325 | H      | -1.064                   | -0.4442 | 1.88475 |
| O           | -2.4106                  | 1.27    | -2.6179 | H      | -0.5023                  | -2.0034 | -1.0258 |
| C           | -2.2524                  | -2.5025 | 0.05554 | H      | 0.86816                  | 0.65125 | 2.76324 |
| C           | -1.2019                  | 0.63604 | 0.00455 | H      | 1.30279                  | 1.88629 | 0.02632 |
| C           | -0.5943                  | 0.33131 | 1.28584 | H      | -0.3033                  | 3.45788 | 1.23786 |
| C           | -1.056                   | -2.7641 | -0.4823 | H      | 0.8915                   | 3.60154 | 2.52606 |
| C           | 0.50233                  | 0.9404  | 1.7793  | H      | 1.14001                  | 5.53324 | 1.07206 |
| C           | 1.2916                   | 2.0338  | 1.10736 | H      | 2.55734                  | 4.53281 | 0.84813 |
| C           | 0.76947                  | 3.43675 | 1.44868 | H      | 1.11238                  | -5.3882 | -1.0597 |
| C           | 1.47586                  | 4.56261 | 0.68369 | H      | 0.90823                  | -3.9009 | -2.0119 |
| C           | -0.4397                  | -4.1218 | -0.3514 | H      | 1.8513                   | -2.5486 | -0.0982 |
| C           | 0.92423                  | -4.3121 | -0.9922 | H      | 2.05035                  | -4.0291 | 0.83367 |
| O           | -0.998                   | -5.022  | 0.25871 | H      | 3.63292                  | -4.9102 | -0.9127 |
| C           | 2.05004                  | -3.6251 | -0.188  | H      | 3.41922                  | -3.4373 | -1.8504 |
| C           | 3.43118                  | -3.8324 | -0.8238 | H      | 4.35277                  | -2.086  | 0.0403  |
| C           | 4.56461                  | -3.1601 | -0.0385 | H      | 4.57361                  | -3.5529 | 0.98871 |
| C           | 5.94153                  | -3.3727 | -0.6765 | H      | 6.73242                  | -2.8854 | -0.0942 |
| O           | -3.5778                  | -1.053  | 1.30501 | H      | 6.18958                  | -4.4394 | -0.7449 |
| O           | -4.7211                  | 0.84429 | 0.78309 | H      | 5.97524                  | -2.9599 | -1.6923 |
| C           | -4.3985                  | -6E-05  | 1.58344 | H      | -5.535                   | 0.75484 | 3.22625 |
| C           | -4.8268                  | -0.0513 | 3.03216 | H      | -5.2844                  | -1.0187 | 3.26146 |
| C           | 1.26008                  | 4.6142  | -0.8235 | H      | -3.9535                  | 0.05977 | 3.68387 |
| O           | 1.93219                  | 5.28426 | -1.5759 | H      | -0.8823                  | 3.15713 | -2.7773 |
| O           | 0.21689                  | 3.85536 | -1.2251 | H      | -0.407                   | 4.88878 | -2.9276 |
| C           | -0.0842                  | 3.88534 | -2.638  | H      | 0.80286                  | 3.61628 | -3.2164 |
| O           | 2.6698                   | 1.99136 | 1.5743  | H      | 5.50513                  | 0.3852  | 1.13445 |
| O           | 3.10272                  | 0.24729 | 0.19464 | H      | 5.28655                  | 2.1408  | 1.39649 |
| C           | 3.47472                  | 1.04768 | 1.02549 | H      | 4.84826                  | 1.00918 | 2.67681 |
| C           | 4.87174                  | 1.14632 | 1.59069 |        |                          |         |         |

| Conformer 8 |                          |         |         |        |                          |         |         |
|-------------|--------------------------|---------|---------|--------|--------------------------|---------|---------|
| Atomic      | Standard Orientation (Å) |         |         | Atomic | Standard Orientation (Å) |         |         |
| Type        | X                        | Y       | Z       | Type   | X                        | Y       | Z       |
| C           | 1.91187                  | 3.57864 | -1.3514 | H      | 1.5588                   | 4.60285 | -1.4165 |
| C           | 1.23434                  | 2.59467 | -0.3984 | H      | 3.51395                  | 3.49304 | -2.8141 |
| C           | 2.05703                  | 1.3266  | -0.5995 | H      | -0.3184                  | 1.90785 | -1.7963 |
| C           | 3.0904                   | 1.60115 | -1.6394 | H      | 2.59602                  | -0.6551 | -0.4132 |
| C           | 2.89789                  | 3.01684 | -2.0602 | H      | 0.23289                  | 0.49615 | 1.2488  |
| O           | 3.9169                   | 0.81251 | -2.0706 | H      | -1.2214                  | 3.15135 | 0.8569  |
| C           | -0.1965                  | 2.37877 | -0.823  | H      | -0.1828                  | -1.6149 | 2.08848 |
| C           | 1.90004                  | 0.0984  | -0.0635 | H      | 1.73955                  | -3.1824 | 2.1568  |
| C           | 0.89452                  | -0.2933 | 0.90226 | H      | 0.92551                  | -4.8979 | 0.74778 |
| C           | -1.2956                  | 2.67982 | -0.1176 | H      | -0.4623                  | -4.0369 | 1.41456 |
| C           | 0.65661                  | -1.5252 | 1.40143 | H      | 0.59376                  | -3.3834 | -1.3896 |
| C           | 1.33015                  | -2.8504 | 1.19453 | H      | -0.4979                  | -4.722  | -1.1237 |
| C           | 0.36851                  | -3.956  | 0.70547 | H      | -3.5279                  | 2.84867 | 1.27587 |
| C           | -0.1803                  | -3.7551 | -0.7109 | H      | -4.1589                  | 3.70899 | -0.1181 |
| C           | -2.6475                  | 2.3175  | -0.6266 | H      | -5.915                   | 2.19654 | 0.55584 |
| C           | -3.8447                  | 2.7135  | 0.23364 | H      | -5.2187                  | 1.53441 | -0.9227 |
| O           | -2.8                     | 1.7331  | -1.6929 | H      | -3.8222                  | -0.0551 | 0.48174 |
| C           | -5.0157                  | 1.72585 | 0.13731 | H      | -4.5686                  | 0.60328 | 1.93152 |
| C           | -4.7457                  | 0.40066 | 0.864   | H      | -6.8214                  | -0.168  | 1.10239 |
| C           | -5.8884                  | -0.6133 | 0.72727 | H      | -6.0584                  | -0.8192 | -0.3394 |
| C           | -5.6085                  | -1.928  | 1.46357 | H      | -6.4268                  | -2.6447 | 1.32711 |
| O           | 1.18238                  | 3.09482 | 0.96535 | H      | -4.6836                  | -2.3907 | 1.10052 |
| O           | 3.44651                  | 3.16713 | 1.18526 | H      | -5.4927                  | -1.7587 | 2.54159 |
| C           | 2.34252                  | 3.32978 | 1.64405 | H      | 2.96269                  | 4.05352 | 3.5544  |
| C           | 2.03096                  | 3.81111 | 3.04249 | H      | 1.38116                  | 4.69136 | 3.00877 |
| C           | -1.3897                  | -2.8386 | -0.7976 | H      | 1.49869                  | 3.03034 | 3.59629 |
| O           | -2.0718                  | -2.478  | 0.14172 | H      | -2.9206                  | -1.6956 | -3.4105 |
| O           | -1.6354                  | -2.5144 | -2.0787 | H      | -3.6693                  | -2.0954 | -1.8291 |
| C           | -2.7882                  | -1.6851 | -2.3282 | H      | -2.6104                  | -0.6641 | -1.9829 |
| O           | 2.43634                  | -2.7411 | 0.27096 | H      | 5.55934                  | -3.6453 | -0.187  |
| O           | 3.68243                  | -4.1708 | 1.51691 | H      | 4.29701                  | -3.7068 | -1.4442 |
| C           | 3.56553                  | -3.4513 | 0.55093 | H      | 4.72217                  | -2.1523 | -0.7291 |
| C           | 4.60992                  | -3.2195 | -0.5136 |        |                          |         |         |

| Conformer 9 |                          |         |         |        |                          |         |         |
|-------------|--------------------------|---------|---------|--------|--------------------------|---------|---------|
| Atomic      | Standard Orientation (Å) |         |         | Atomic | Standard Orientation (Å) |         |         |
| Type        | X                        | Y       | Z       | Type   | X                        | Y       | Z       |
| C           | 0.20674                  | 3.58889 | 1.11238 | H      | 0.94351                  | 4.35221 | 0.90119 |
| C           | -0.0775                  | 2.48282 | 0.09387 | H      | -0.4799                  | 4.08757 | 3.11072 |
| C           | -1.1603                  | 1.67605 | 0.78644 | H      | 1.88176                  | 2.26975 | -0.9089 |
| C           | -1.4163                  | 2.27631 | 2.12798 | H      | -2.5921                  | 0.2269  | 1.06645 |
| C           | -0.5156                  | 3.45144 | 2.23356 | H      | -1.1113                  | 0.43604 | -1.6579 |
| O           | -2.2229                  | 1.88568 | 2.96056 | H      | 0.94733                  | -0.0125 | 0.92365 |
| C           | 1.19794                  | 1.74288 | -0.2477 | H      | -2.3624                  | -1.3693 | -2.4215 |
| C           | -1.8832                  | 0.62491 | 0.35082 | H      | -4.5183                  | -1.8184 | -1.3644 |
| C           | -1.8164                  | 0.00081 | -0.9547 | H      | -4.0882                  | -3.9063 | -0.2425 |
| C           | 1.57464                  | 0.55448 | 0.2409  | H      | -3.017                   | -3.7589 | -1.6335 |
| C           | -2.5508                  | -1.0416 | -1.3994 | H      | -2.1396                  | -3.1511 | 1.25586 |
| C           | -3.6155                  | -1.8824 | -0.7455 | H      | -1.9739                  | -4.7265 | 0.48617 |
| C           | -3.2164                  | -3.3677 | -0.6307 | H      | 3.26155                  | -0.9825 | 1.75078 |
| C           | -2.0169                  | -3.6464 | 0.29009 | H      | 2.56193                  | -2.0119 | 0.53425 |
| C           | 2.90257                  | -0.0321 | -0.1267 | H      | 4.8347                   | -2.7821 | 0.77184 |
| C           | 3.33513                  | -1.244  | 0.68336 | H      | 4.81195                  | -1.8852 | -0.7456 |
| O           | 3.57921                  | 0.43387 | -1.0329 | H      | 5.77296                  | 0.11306 | 0.4163  |
| C           | 4.73012                  | -1.776  | 0.34322 | H      | 5.79081                  | -0.7728 | 1.94001 |
| C           | 5.87681                  | -0.8897 | 0.84862 | H      | 7.36423                  | -2.4586 | 0.93089 |
| C           | 7.26483                  | -1.4474 | 0.51002 | H      | 7.35075                  | -1.5613 | -0.5799 |
| C           | 8.40954                  | -0.567  | 1.02182 | H      | 9.38744                  | -0.9886 | 0.76185 |
| O           | -0.6785                  | 3.0054  | -1.1482 | H      | 8.35556                  | 0.44054 | 0.59161 |
| O           | 0.97516                  | 4.52457 | -1.5234 | H      | 8.37175                  | -0.4621 | 2.11334 |
| C           | -0.0657                  | 3.99514 | -1.846  | H      | -0.3908                  | 5.16149 | -3.6055 |
| C           | -0.8708                  | 4.33605 | -3.0789 | H      | -0.9349                  | 3.46347 | -3.7374 |
| C           | -0.6492                  | -3.2587 | -0.2427 | H      | -1.8928                  | 4.61029 | -2.7994 |
| O           | 0.24057                  | -2.7759 | 0.42646 | H      | 0.70159                  | -3.6009 | -3.1706 |
| O           | -0.509                   | -3.5775 | -1.5485 | H      | 0.97925                  | -2.2087 | -2.0728 |
| C           | 0.77187                  | -3.2804 | -2.1309 | H      | 1.56445                  | -3.828  | -1.6147 |
| O           | -3.9687                  | -1.4262 | 0.57736 | H      | -6.3394                  | 0.06973 | 2.30061 |
| O           | -5.9847                  | -0.6687 | -0.1498 | H      | -5.221                   | -1.215  | 2.85147 |
| C           | -5.1823                  | -0.816  | 0.74223 | H      | -4.5798                  | 0.37265 | 2.43064 |
| C           | -5.3481                  | -0.366  | 2.17204 |        |                          |         |         |

| Conformer 10 |                          |         |         |        |                          |         |         |
|--------------|--------------------------|---------|---------|--------|--------------------------|---------|---------|
| Atomic       | Standard Orientation (Å) |         |         | Atomic | Standard Orientation (Å) |         |         |
| Type         | X                        | Y       | Z       | Type   | X                        | Y       | Z       |
| C            | -0.1504                  | 3.69269 | 0.88031 | H      | 0.34934                  | 4.63124 | 0.66195 |
| C            | -0.2233                  | 2.59331 | -0.177  | H      | -0.7553                  | 3.91151 | 2.95551 |
| C            | -1.0275                  | 1.51498 | 0.5249  | H      | 1.69828                  | 2.91918 | -1.2121 |
| C            | -1.316                   | 1.98031 | 1.91575 | H      | -1.8834                  | -0.3397 | 0.81007 |
| C            | -0.7063                  | 3.32962 | 2.04262 | H      | -0.9046                  | 0.52095 | -2.0224 |
| O            | -1.9352                  | 1.3718  | 2.77506 | H      | 1.38312                  | 0.34589 | 0.43459 |
| C            | 1.18471                  | 2.20073 | -0.5746 | H      | -1.1342                  | -1.7488 | -2.6949 |
| C            | -1.3875                  | 0.29593 | 0.07942 | H      | -1.4408                  | -2.4388 | 0.2891  |
| C            | -1.1807                  | -0.2104 | -1.2669 | H      | -3.0776                  | -3.6014 | -2.0217 |
| C            | 1.84651                  | 1.10319 | -0.1914 | H      | -3.0404                  | -4.1916 | -0.3566 |
| C            | -1.2948                  | -1.4979 | -1.6464 | H      | -4.0932                  | -1.4227 | -1.2167 |
| C            | -1.5848                  | -2.6805 | -0.7631 | H      | -5.0894                  | -2.8166 | -0.8614 |
| C            | -2.9788                  | -3.2902 | -0.9748 | H      | 3.84134                  | -0.3493 | 1.01624 |
| C            | -4.1294                  | -2.3418 | -0.6216 | H      | 3.24718                  | -1.2422 | -0.3446 |
| C            | 3.2548                   | 0.85951 | -0.6362 | H      | 5.60438                  | -1.6872 | -0.3373 |
| C            | 3.90383                  | -0.3989 | -0.0815 | H      | 5.36341                  | -0.542  | -1.6482 |
| O            | 3.8252                   | 1.61857 | -1.407  | H      | 7.35754                  | 0.09831 | -0.4603 |
| C            | 5.33994                  | -0.6451 | -0.5569 | H      | 6.13133                  | 1.33046 | -0.2158 |
| C            | 6.39978                  | 0.29958 | 0.04102 | H      | 7.32766                  | 0.97525 | 1.85942 |
| C            | 6.61631                  | 0.1933  | 1.56096 | H      | 5.68354                  | 0.42629 | 2.09344 |
| C            | 7.14554                  | -1.1655 | 2.03544 | H      | 7.34238                  | -1.1581 | 3.11375 |
| O            | -0.7963                  | 3.07844 | -1.4364 | H      | 6.43293                  | -1.9749 | 1.83918 |
| O            | -2.7996                  | 3.60499 | -0.4927 | H      | 8.08411                  | -1.4217 | 1.52763 |
| C            | -2.0727                  | 3.55676 | -1.4557 | H      | -3.4394                  | 4.42466 | -2.8486 |
| C            | -2.4332                  | 4.00447 | -2.8541 | H      | -1.7161                  | 4.75022 | -3.2116 |
| C            | -4.1591                  | -1.9563 | 0.84904 | H      | -2.3907                  | 3.15458 | -3.5435 |
| O            | -3.4792                  | -2.4685 | 1.71632 | H      | -5.8744                  | 0.28477 | 2.4282  |
| O            | -5.0327                  | -0.9607 | 1.07097 | H      | -5.306                   | -1.2711 | 3.12322 |
| C            | -5.0792                  | -0.4609 | 2.42614 | H      | -4.1217                  | -0.0043 | 2.68925 |
| O            | -0.6518                  | -3.7507 | -1.105  | H      | 2.46637                  | -4.7026 | -0.6991 |
| O            | 1.02389                  | -2.6791 | -0.0143 | H      | 1.00655                  | -5.7369 | -0.7001 |
| C            | 0.62088                  | -3.6228 | -0.6608 | H      | 1.47278                  | -4.8883 | -2.1749 |
| C            | 1.45156                  | -4.8127 | -1.0826 |        |                          |         |         |



| Conformer 11 |                          |         |         |        |                          |         |         |
|--------------|--------------------------|---------|---------|--------|--------------------------|---------|---------|
| Atomic       | Standard Orientation (Å) |         |         | Atomic | Standard Orientation (Å) |         |         |
| Type         | X                        | Y       | Z       | Type   | X                        | Y       | Z       |
| C            | -0.1504                  | 3.69269 | 0.88031 | H      | 0.34934                  | 4.63124 | 0.66195 |
| C            | -0.2233                  | 2.59331 | -0.177  | H      | -0.7553                  | 3.91151 | 2.95551 |
| C            | -1.0275                  | 1.51498 | 0.5249  | H      | 1.69828                  | 2.91918 | -1.2121 |
| C            | -1.316                   | 1.98031 | 1.91575 | H      | -1.8834                  | -0.3397 | 0.81007 |
| C            | -0.7063                  | 3.32962 | 2.04262 | H      | -0.9046                  | 0.52095 | -2.0224 |
| O            | -1.9352                  | 1.3718  | 2.77506 | H      | 1.38312                  | 0.34589 | 0.43459 |
| C            | 1.18471                  | 2.20073 | -0.5746 | H      | -1.1342                  | -1.7488 | -2.6949 |
| C            | -1.3875                  | 0.29593 | 0.07942 | H      | -1.4408                  | -2.4388 | 0.2891  |
| C            | -1.1807                  | -0.2104 | -1.2669 | H      | -3.0776                  | -3.6014 | -2.0217 |
| C            | 1.84651                  | 1.10319 | -0.1914 | H      | -3.0404                  | -4.1916 | -0.3566 |
| C            | -1.2948                  | -1.4979 | -1.6464 | H      | -4.0932                  | -1.4227 | -1.2167 |
| C            | -1.5848                  | -2.6805 | -0.7631 | H      | -5.0894                  | -2.8166 | -0.8614 |
| C            | -2.9788                  | -3.2902 | -0.9748 | H      | 3.84134                  | -0.3493 | 1.01624 |
| C            | -4.1294                  | -2.3418 | -0.6216 | H      | 3.24718                  | -1.2422 | -0.3446 |
| C            | 3.2548                   | 0.85951 | -0.6362 | H      | 5.60438                  | -1.6872 | -0.3373 |
| C            | 3.90383                  | -0.3989 | -0.0815 | H      | 5.36341                  | -0.542  | -1.6482 |
| O            | 3.8252                   | 1.61857 | -1.407  | H      | 7.35754                  | 0.09831 | -0.4603 |
| C            | 5.33994                  | -0.6451 | -0.5569 | H      | 6.13133                  | 1.33046 | -0.2158 |
| C            | 6.39978                  | 0.29958 | 0.04102 | H      | 7.32766                  | 0.97525 | 1.85942 |
| C            | 6.61631                  | 0.1933  | 1.56096 | H      | 5.68354                  | 0.42629 | 2.09344 |
| C            | 7.14554                  | -1.1655 | 2.03544 | H      | 7.34238                  | -1.1581 | 3.11375 |
| O            | -0.7963                  | 3.07844 | -1.4364 | H      | 6.43293                  | -1.9749 | 1.83918 |
| O            | -2.7996                  | 3.60499 | -0.4927 | H      | 8.08411                  | -1.4217 | 1.52763 |
| C            | -2.0727                  | 3.55676 | -1.4557 | H      | -3.4394                  | 4.42466 | -2.8486 |
| C            | -2.4332                  | 4.00447 | -2.8541 | H      | -1.7161                  | 4.75022 | -3.2116 |
| C            | -4.1591                  | -1.9563 | 0.84904 | H      | -2.3907                  | 3.15458 | -3.5435 |
| O            | -3.4792                  | -2.4685 | 1.71632 | H      | -5.8744                  | 0.28477 | 2.4282  |
| O            | -5.0327                  | -0.9607 | 1.07097 | H      | -5.306                   | -1.2711 | 3.12322 |
| C            | -5.0792                  | -0.4609 | 2.42614 | H      | -4.1217                  | -0.0043 | 2.68925 |
| O            | -0.6518                  | -3.7507 | -1.105  | H      | 2.46637                  | -4.7026 | -0.6991 |
| O            | 1.02389                  | -2.6791 | -0.0143 | H      | 1.00655                  | -5.7369 | -0.7001 |
| C            | 0.62088                  | -3.6228 | -0.6608 | H      | 1.47278                  | -4.8883 | -2.1749 |
| C            | 1.45156                  | -4.8127 | -1.0826 |        |                          |         |         |

| Conformer 12 |                          |         |         |        |                          |         |         |
|--------------|--------------------------|---------|---------|--------|--------------------------|---------|---------|
| Atomic       | Standard Orientation (Å) |         |         | Atomic | Standard Orientation (Å) |         |         |
| Type         | X                        | Y       | Z       | Type   | X                        | Y       | Z       |
| C            | 0.09782                  | 3.57189 | 1.25349 | H      | 0.72602                  | 4.44535 | 1.14154 |
| C            | -0.0394                  | 2.56369 | 0.11265 | H      | -0.6463                  | 3.74085 | 3.28646 |
| C            | -0.9929                  | 1.53703 | 0.69759 | H      | 1.95014                  | 2.74887 | -0.8369 |
| C            | -1.3302                  | 1.945   | 2.09314 | H      | -2.1047                  | -0.1947 | 0.79698 |
| C            | -0.5978                  | 3.2116  | 2.34155 | H      | -0.9118                  | 0.73363 | -1.9249 |
| O            | -2.0756                  | 1.36161 | 2.86702 | H      | 1.23421                  | 0.07969 | 0.5059  |
| C            | 1.31946                  | 2.04147 | -0.3036 | H      | -1.3949                  | -1.4369 | -2.7752 |
| C            | -1.4925                  | 0.41759 | 0.13752 | H      | -1.8982                  | -2.2978 | 0.13721 |
| C            | -1.2982                  | -0.0126 | -1.2365 | H      | -3.5763                  | -3.0602 | -2.3077 |
| C            | 1.81122                  | 0.82591 | -0.033  | H      | -3.6773                  | -3.7817 | -0.6979 |
| C            | -1.5598                  | -1.2443 | -1.7151 | H      | -4.3378                  | -0.8391 | -1.3449 |
| C            | -2.0296                  | -2.4413 | -0.9345 | H      | -5.5167                  | -2.1169 | -1.1483 |
| C            | -3.4798                  | -2.8491 | -1.2359 | H      | 3.58265                  | -0.9455 | 1.09506 |
| C            | -4.5156                  | -1.7931 | -0.8361 | H      | 2.91048                  | -1.6643 | -0.331  |
| C            | 3.18626                  | 0.43499 | -0.4782 | H      | 5.19327                  | -2.4016 | -0.3249 |
| C            | 3.66125                  | -0.9295 | -0.0027 | H      | 5.12374                  | -1.1508 | -1.5574 |
| O            | 3.86264                  | 1.16396 | -1.1895 | H      | 7.15696                  | -0.8455 | -0.3049 |
| C            | 5.06507                  | -1.3223 | -0.4761 | H      | 6.08845                  | 0.51144 | 0.00874 |
| C            | 6.2216                   | -0.5596 | 0.19764 | H      | 7.18845                  | -0.1272 | 2.06898 |
| C            | 6.39231                  | -0.793  | 1.70917 | H      | 5.48478                  | -0.4816 | 2.24513 |
| C            | 6.74007                  | -2.2357 | 2.0957  | H      | 6.91414                  | -2.3247 | 3.17429 |
| O            | -0.7157                  | 3.14293 | -1.0656 | H      | 5.9373                   | -2.9353 | 1.83563 |
| O            | 0.71834                  | 4.90198 | -1.2463 | H      | 7.65015                  | -2.5722 | 1.58291 |
| C            | -0.2412                  | 4.2773  | -1.6414 | H      | -0.747                   | 5.6001  | -3.2399 |
| C            | -1.0808                  | 4.64022 | -2.8446 | H      | -0.9776                  | 3.86944 | -3.616  |
| C            | -4.5601                  | -1.5345 | 0.66144 | H      | -2.1389                  | 4.6906  | -2.5704 |
| O            | -3.9829                  | -2.1977 | 1.4999  | H      | -6.0762                  | 0.74005 | 2.38972 |
| O            | -5.3191                  | -0.4626 | 0.94628 | H      | -5.7085                  | -0.9258 | 2.95058 |
| C            | -5.3667                  | -0.0863 | 2.34067 | H      | -4.3765                  | 0.23378 | 2.67494 |
| O            | -1.2265                  | -3.5943 | -1.3305 | H      | 1.72719                  | -4.9676 | -0.8997 |
| O            | 0.52384                  | -2.8303 | -0.1069 | H      | 0.14991                  | -5.8017 | -1.0328 |
| C            | 0.03308                  | -3.6645 | -0.8375 | H      | 0.78361                  | -4.9121 | -2.4183 |
| C            | 0.72431                  | -4.9167 | -1.3248 |        |                          |         |         |

| Conformer 13 |                          |         |         |        |                          |         |         |
|--------------|--------------------------|---------|---------|--------|--------------------------|---------|---------|
| Atomic       | Standard Orientation (Å) |         |         | Atomic | Standard Orientation (Å) |         |         |
| Type         | X                        | Y       | Z       | Type   | X                        | Y       | Z       |
| C            | 0.57209                  | 3.68637 | 0.62326 | H      | 1.26914                  | 4.43822 | 0.26671 |
| C            | 0.14454                  | 2.53642 | -0.2882 | H      | 0.21982                  | 4.26258 | 2.68761 |
| C            | -0.8608                  | 1.79589 | 0.57226 | H      | 1.985                    | 2.23071 | -1.4619 |
| C            | -0.8932                  | 2.44569 | 1.91781 | H      | -2.2613                  | 0.38243 | 1.10415 |
| C            | 0.04382                  | 3.59764 | 1.85017 | H      | -1.112                   | 0.44409 | -1.7851 |
| O            | -1.5622                  | 2.09371 | 2.87748 | H      | 1.25632                  | 0.08476 | 0.61069 |
| C            | 1.37962                  | 1.75779 | -0.6898 | H      | -2.4138                  | -1.4064 | -2.3058 |
| C            | -1.6383                  | 0.73262 | 0.29057 | H      | -4.4399                  | -1.7849 | -0.9307 |
| C            | -1.725                   | 0.04234 | -0.9813 | H      | -3.8861                  | -3.8714 | 0.08154 |
| C            | 1.81448                  | 0.60846 | -0.1608 | H      | -3.0171                  | -3.7368 | -1.4437 |
| C            | -2.4855                  | -1.0315 | -1.2854 | H      | -1.7387                  | -3.1737 | 1.30282 |
| C            | -3.4463                  | -1.8533 | -0.4713 | H      | -1.6967                  | -4.7379 | 0.49237 |
| C            | -3.065                   | -3.3483 | -0.4211 | H      | 3.56899                  | -0.9508 | 1.23283 |
| C            | -1.7543                  | -3.6541 | 0.32196 | H      | 2.79189                  | -1.972  | 0.0636  |
| C            | 3.1058                   | 0.00336 | -0.6186 | H      | 5.0631                   | -2.7663 | 0.1528  |
| C            | 3.57938                  | -1.2104 | 0.16389 | H      | 4.92789                  | -1.8806 | -1.364  |
| O            | 3.72108                  | 0.45733 | -1.5738 | H      | 7.04238                  | -1.3068 | -0.39   |
| C            | 4.94084                  | -1.7614 | -0.2743 | H      | 6.01883                  | 0.11439 | -0.2872 |
| C            | 6.15447                  | -0.898  | 0.11328 | H      | 5.57837                  | -0.3988 | 2.14959 |
| C            | 6.43981                  | -0.8287 | 1.62018 | H      | 6.55966                  | -1.8486 | 2.01402 |
| C            | 7.6888                   | -0.0044 | 1.95081 | H      | 7.87401                  | 0.02955 | 3.03065 |
| O            | -0.3741                  | 3.00571 | -1.5757 | H      | 8.58054                  | -0.4281 | 1.47243 |
| O            | -2.0593                  | 4.20832 | -0.6298 | H      | 7.58549                  | 1.02884 | 1.59713 |
| C            | -1.4678                  | 3.81886 | -1.6075 | H      | -2.6436                  | 4.86419 | -3.0519 |
| C            | -1.8253                  | 4.14354 | -3.0402 | H      | -0.9575                  | 4.5482  | -3.57   |
| C            | -0.4674                  | -3.2653 | -0.3832 | H      | -2.132                   | 3.23106 | -3.5629 |
| O            | 0.50242                  | -2.7854 | 0.16591 | H      | 0.49226                  | -3.5933 | -3.4627 |
| O            | -0.4989                  | -3.5781 | -1.6978 | H      | 0.90832                  | -2.2054 | -2.4033 |
| C            | 0.69581                  | -3.2771 | -2.4393 | H      | 1.5488                   | -3.8258 | -2.0319 |
| O            | -3.5597                  | -1.3571 | 0.87907 | H      | -5.741                   | -0.4974 | 3.18022 |
| O            | -5.8167                  | -1.5966 | 0.83781 | H      | -4.2593                  | -1.4438 | 3.48003 |
| C            | -4.8096                  | -1.2631 | 1.41925 | H      | -4.1184                  | 0.19704 | 2.85114 |
| C            | -4.7335                  | -0.7083 | 2.82023 |        |                          |         |         |

| Conformer 14 |                          |         |         |        |                          |         |         |
|--------------|--------------------------|---------|---------|--------|--------------------------|---------|---------|
| Atomic       | Standard Orientation (Å) |         |         | Atomic | Standard Orientation (Å) |         |         |
| Type         | X                        | Y       | Z       | Type   | X                        | Y       | Z       |
| C            | -0.4847                  | -3.5337 | 1.53607 | H      | -1.2555                  | -4.2943 | 1.60691 |
| C            | -0.5688                  | -2.4572 | 0.4549  | H      | 0.82079                  | -3.9631 | 3.21758 |
| C            | 0.72644                  | -1.6809 | 0.66712 | H      | -1.7419                  | -1.044  | 1.66854 |
| C            | 1.39623                  | -2.2255 | 1.88449 | H      | 2.20092                  | -0.2786 | 0.31799 |
| C            | 0.56183                  | -3.3636 | 2.35273 | H      | -0.3249                  | -0.3887 | -1.4953 |
| O            | 2.42366                  | -1.8113 | 2.40167 | H      | -2.9642                  | -2.0281 | -0.9658 |
| C            | -1.7806                  | -1.6014 | 0.73476 | H      | 0.56759                  | 1.33736 | -2.7698 |
| C            | 1.24995                  | -0.6572 | -0.0377 | H      | 2.92984                  | 1.73898 | -2.8821 |
| C            | 0.65996                  | -0.0304 | -1.2048 | H      | 3.33783                  | 3.61685 | -1.4335 |
| C            | -2.8763                  | -1.489  | -0.0273 | H      | 1.68891                  | 3.6748  | -2.0557 |
| C            | 1.18706                  | 0.96072 | -1.9556 | H      | 1.6148                   | 4.33954 | 0.2599  |
| C            | 2.50072                  | 1.6876  | -1.8748 | H      | 0.86209                  | 2.74705 | 0.18595 |
| C            | 2.35477                  | 3.14103 | -1.3666 | H      | -4.8472                  | -0.402  | -1.5659 |
| C            | 1.80996                  | 3.2772  | 0.06249 | H      | -5.6212                  | -1.6033 | -0.5623 |
| C            | -4.0093                  | -0.6131 | 0.39569 | H      | -7.2085                  | 0.19576 | -0.7203 |
| C            | -5.211                   | -0.5809 | -0.5424 | H      | -6.5344                  | 0.30074 | 0.90525 |
| O            | -3.9807                  | 0.01986 | 1.44103 | H      | -4.9896                  | 2.12208 | 0.15126 |
| C            | -6.295                   | 0.42962 | -0.1571 | H      | -5.6499                  | 2.01664 | -1.4801 |
| C            | -5.9                     | 1.89014 | -0.4152 | H      | -7.9187                  | 2.64758 | -0.592  |
| C            | -7.0015                  | 2.88745 | -0.0349 | H      | -7.2489                  | 2.76131 | 1.02842 |
| C            | -6.6109                  | 4.34533 | -0.2979 | H      | -7.4153                  | 5.03326 | -0.0135 |
| O            | -0.7521                  | -3.0045 | -0.8761 | H      | -5.7167                  | 4.62396 | 0.27298 |
| O            | 1.17969                  | -4.2041 | -0.8025 | H      | -6.3904                  | 4.51196 | -1.3598 |
| C            | 0.19064                  | -3.8458 | -1.3931 | H      | 0.52192                  | -4.9814 | -3.1701 |
| C            | -0.1894                  | -4.2421 | -2.8008 | H      | -1.2043                  | -4.6511 | -2.8248 |
| C            | 2.79244                  | 2.815   | 1.12727 | H      | -0.1737                  | -3.3611 | -3.4516 |
| O            | 3.97902                  | 3.07479 | 1.13155 | H      | 2.31907                  | 1.6152  | 4.05259 |
| O            | 2.16026                  | 2.11007 | 2.0846  | H      | 3.23494                  | 0.56047 | 2.94007 |
| C            | 2.95943                  | 1.59286 | 3.16916 | H      | 3.8478                   | 2.20889 | 3.315   |
| O            | 3.43478                  | 0.9717  | -1.043  | H      | 5.20304                  | -0.5398 | -0.0252 |
| O            | 5.15314                  | 1.68184 | -2.3413 | H      | 6.63189                  | 0.31833 | -0.6955 |
| C            | 4.7587                   | 1.09421 | -1.3603 | H      | 5.6236                   | 1.07286 | 0.57183 |
| C            | 5.6155                   | 0.4305  | -0.316  |        |                          |         |         |

Table S3. Energy analyses of 4*S*,12*S*-1/4*R*,12*R*-1 (ten conformers)

| NO. | 3D conformers<br>B3LYP/6-31G(d,p)                                                   | G (Hartree)  | Boltzmann<br>distribution | Calculated ECD spectrum                                                              |
|-----|-------------------------------------------------------------------------------------|--------------|---------------------------|--------------------------------------------------------------------------------------|
|     |                                                                                     |              |                           | 4 <i>S</i> ,12 <i>S</i> -1                                                           |
| 1   | 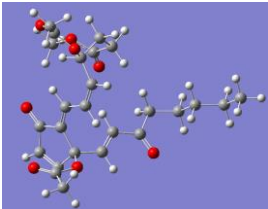   | -1573.242744 | 5.14 %                    |    |
| 2   |    | -1573.242248 | 3.04 %                    |   |
| 3   |  | -1573.241432 | 1.28 %                    |  |
| 4   |  | -1573.244033 | 20.12 %                   |  |

5

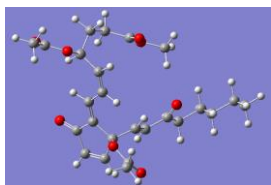

-1573.245111

63.01 %

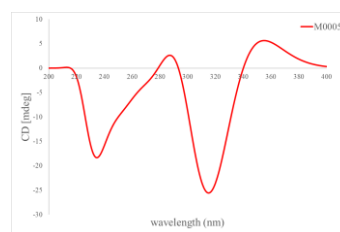

6

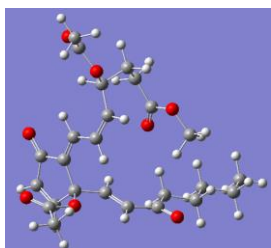

-1573.241519

1.4 %

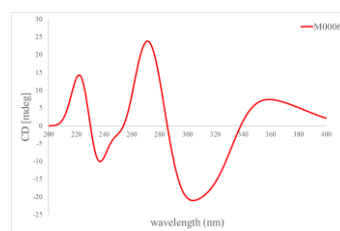

7

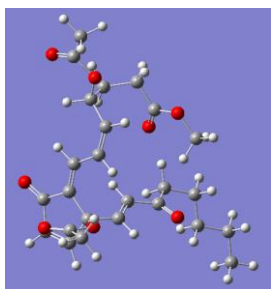

-1573.242182

2.83 %

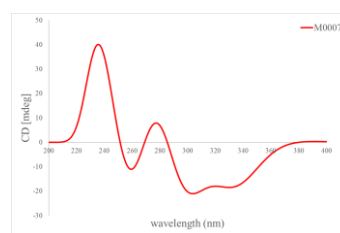

8

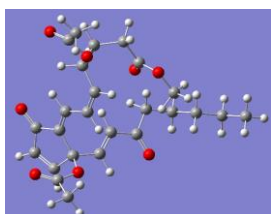

-1573.241161

0.96 %

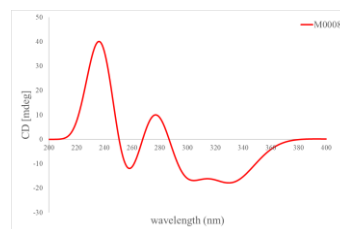

9

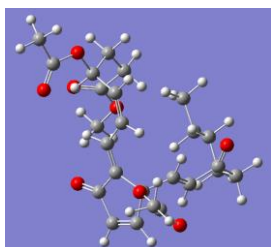

-1573.241458

1.32 %

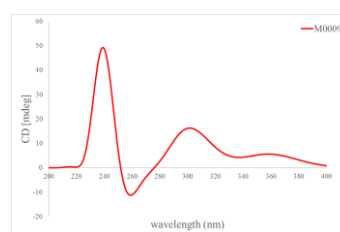

---

10

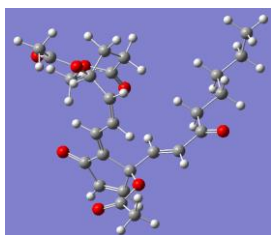

-1573.240815

0.67 %

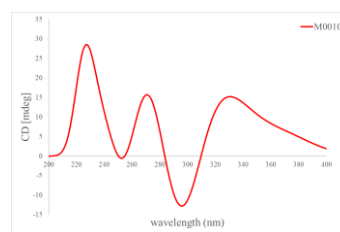

Table S4. Cartesian coordinates of the low-energy re-optimized conformers of 4*S*,12*S*-1/4*R*,12*R*-1 calculated at B3LYP/6-31G(d,p) level of theory.

| Conformer 1 |                           |         |         |        |                           |         |         |
|-------------|---------------------------|---------|---------|--------|---------------------------|---------|---------|
| Atomic      | Standard Orientation (Å ) |         |         | Atomic | Standard Orientation (Å ) |         |         |
| Type        | X                         | Y       | Z       | Type   | X                         | Y       | Z       |
| C           | -0.0539                   | -4.0445 | 0.93033 | H      | -0.6445                   | -4.9314 | 0.72414 |
| C           | -0.0324                   | -2.8837 | -0.0623 | H      | 0.75433                   | -4.4235 | 2.91134 |
| C           | 0.96889                   | -1.9346 | 0.57075 | H      | -2.0853                   | -2.9052 | -0.876  |
| C           | 1.32944                   | -2.4739 | 1.91741 | H      | 2.17669                   | -0.2782 | 0.76761 |
| C           | 0.65284                   | -3.7891 | 2.03878 | H      | 0.56759                   | -0.7462 | -1.8654 |
| O           | 2.02616                   | -1.922  | 2.75694 | H      | -1.3589                   | -0.6885 | 1.12947 |
| C           | -1.4399                   | -2.3409 | -0.2044 | H      | 1.27761                   | 1.41429 | -2.5588 |
| C           | 1.47409                   | -0.7773 | 0.10282 | H      | 2.8039                    | 1.61434 | 0.12401 |
| C           | 1.17436                   | -0.1631 | -1.1771 | H      | 2.14547                   | 3.90915 | 0.309   |
| C           | -1.9531                   | -1.291  | 0.44718 | H      | 1.262                     | 3.8636  | -1.2219 |
| C           | 1.56918                   | 1.06597 | -1.5686 | H      | -0.2981                   | 3.8983  | 0.67738 |
| C           | 2.34356                   | 2.06258 | -0.7561 | H      | -0.4998                   | 2.42127 | -0.2457 |
| C           | 1.50761                   | 3.28441 | -0.3232 | H      | -3.9054                   | -0.1508 | 2.15243 |
| C           | 0.19673                   | 2.95542 | 0.40667 | H      | -3.1123                   | 1.02891 | 1.15307 |
| C           | -3.3829                   | -0.8965 | 0.24753 | H      | -5.9534                   | -0.0397 | 0.61692 |
| C           | -3.881                    | 0.24408 | 1.12354 | H      | -5.6297                   | 1.42189 | 1.54863 |
| O           | -4.1035                   | -1.473  | -0.5553 | H      | -4.5229                   | 2.45089 | -0.4616 |
| C           | -5.2529                   | 0.79672 | 0.728   | H      | -4.8638                   | 0.99038 | -1.3879 |
| C           | -5.2357                   | 1.6185  | -0.5683 | H      | -7.3222                   | 1.34727 | -1.0539 |
| C           | -6.6123                   | 2.17931 | -0.9462 | H      | -6.9922                   | 2.79898 | -0.121  |
| C           | -6.5942                   | 3.00424 | -2.2371 | H      | -7.5911                   | 3.38826 | -2.4823 |
| O           | 0.29722                   | -3.3109 | -1.4215 | H      | -5.9188                   | 3.86456 | -2.1489 |
| O           | 2.30837                   | -4.1839 | -0.8131 | H      | -6.2512                   | 2.40107 | -3.0868 |
| C           | 1.4846                    | -3.9381 | -1.6606 | H      | 2.51478                   | -4.8467 | -3.2955 |
| C           | 1.60886                   | -4.2622 | -3.1316 | H      | 0.73205                   | -4.8181 | -3.4776 |
| C           | 0.29169                   | 2.13929 | 1.68634 | H      | 1.65967                   | -3.3356 | -3.7137 |
| O           | -0.6137                   | 1.4497  | 2.11567 | H      | 2.59376                   | 1.9117  | 3.94936 |
| O           | 1.47086                   | 2.29303 | 2.30859 | H      | 0.8228                    | 1.78296 | 4.23002 |
| C           | 1.64417                   | 1.56236 | 3.54466 | H      | 1.68464                   | 0.48841 | 3.34642 |
| O           | 3.41168                   | 2.53611 | -1.6276 | H      | 6.51092                   | 3.62958 | -1.58   |
| O           | 4.77547                   | 2.85274 | 0.15896 | H      | 5.79679                   | 2.49297 | -2.7619 |
| C           | 4.5819                    | 2.88886 | -1.0355 | H      | 5.18917                   | 4.14691 | -2.6707 |
| C           | 5.58988                   | 3.32038 | -2.0751 |        |                           |         |         |



| Conformer 2 |                          |         |         |        |                          |         |         |
|-------------|--------------------------|---------|---------|--------|--------------------------|---------|---------|
| Atomic      | Standard Orientation (Å) |         |         | Atomic | Standard Orientation (Å) |         |         |
| Type        | X                        | Y       | Z       | Type   | X                        | Y       | Z       |
| C           | 0.15923                  | -3.9419 | 1.14684 | H      | -0.3261                  | -4.8924 | 0.94888 |
| C           | 0.27766                  | -2.8915 | 0.04426 | H      | 0.62935                  | -4.0451 | 3.26577 |
| C           | 1.08837                  | -1.8013 | 0.72141 | H      | -1.5958                  | -3.1683 | -1.0923 |
| C           | 1.24036                  | -2.1663 | 2.163   | H      | 2.13482                  | -0.0392 | 0.92362 |
| C           | 0.64145                  | -3.5148 | 2.32092 | H      | 1.04807                  | -0.9104 | -1.8693 |
| O           | 1.73985                  | -1.4733 | 3.03778 | H      | -1.3792                  | -0.708  | 0.74181 |
| C           | -1.1161                  | -2.4866 | -0.3914 | H      | 1.73159                  | 1.21715 | -2.6815 |
| C           | 1.59328                  | -0.6611 | 0.21319 | H      | 2.74107                  | 1.82193 | 0.17908 |
| C           | 1.48565                  | -0.2105 | -1.1618 | H      | 1.91817                  | 4.06103 | -0.0211 |
| C           | -1.8036                  | -1.4244 | 0.0429  | H      | 1.32963                  | 3.7847  | -1.6653 |
| C           | 1.86491                  | 0.9994  | -1.6225 | H      | -0.5461                  | 3.88955 | -0.0797 |
| C           | 2.41856                  | 2.13591 | -0.8133 | H      | -0.4867                  | 2.31357 | -0.8463 |
| C           | 1.44456                  | 3.32406 | -0.6763 | H      | -4.0168                  | -0.2361 | 1.28742 |
| C           | 0.04639                  | 2.96698 | -0.15   | H      | -3.2478                  | 0.86762 | 0.19203 |
| C           | -3.2012                  | -1.1762 | -0.4329 | H      | -5.1498                  | 0.52077 | -1.468  |
| C           | -3.9192                  | -0.0032 | 0.21407 | H      | -5.9141                  | -0.5865 | -0.3515 |
| O           | -3.7273                  | -1.8795 | -1.2836 | H      | -6.0713                  | 1.26092 | 1.36945 |
| C           | -5.2834                  | 0.31037 | -0.4    | H      | -5.3631                  | 2.3843  | 0.22058 |
| C           | -5.9892                  | 1.48218 | 0.29546 | H      | -8.0175                  | 0.89413 | -0.175  |
| C           | -7.3919                  | 1.79493 | -0.2519 | H      | -7.8612                  | 2.54685 | 0.39694 |
| C           | -7.4103                  | 2.30596 | -1.6976 | H      | -8.4291                  | 2.56039 | -2.012  |
| O           | 0.86724                  | -3.4262 | -1.1824 | H      | -6.7948                  | 3.20842 | -1.8043 |
| O           | 2.79313                  | -4.0607 | -0.1503 | H      | -7.0273                  | 1.55817 | -2.4008 |
| C           | 2.11619                  | -3.9731 | -1.146  | H      | 1.75349                  | -5.0978 | -2.9473 |
| C           | 2.51674                  | -4.435  | -2.5283 | H      | 2.60481                  | -3.5726 | -3.1979 |
| C           | -0.0411                  | 2.29713 | 1.21258 | H      | 3.47494                  | -4.9523 | -2.4706 |
| O           | -0.9642                  | 1.58303 | 1.55507 | H      | 1.82099                  | 2.49683 | 3.85175 |
| O           | 0.99389                  | 2.61092 | 2.00746 | H      | 0.04111                  | 2.24517 | 3.83244 |
| C           | 0.98667                  | 2.02765 | 3.33083 | H      | 1.1343                   | 0.94662 | 3.26822 |
| O           | 3.59377                  | 2.60081 | -1.5395 | H      | 6.55619                  | 3.953   | -1.0947 |
| O           | 4.59272                  | 3.21715 | 0.40321 | H      | 6.15002                  | 2.62771 | -2.2243 |
| C           | 4.61469                  | 3.10944 | -0.8024 | H      | 5.42541                  | 4.21955 | -2.457  |
| C           | 5.76469                  | 3.50738 | -1.698  |        |                          |         |         |

| Conformer 3 |                          |         |         |        |                          |         |         |
|-------------|--------------------------|---------|---------|--------|--------------------------|---------|---------|
| Atomic      | Standard Orientation (Å) |         |         | Atomic | Standard Orientation (Å) |         |         |
| Type        | X                        | Y       | Z       | Type   | X                        | Y       | Z       |
| C           | 2.06977                  | -3.6832 | -1.2463 | H      | 3.11115                  | -3.9582 | -1.1517 |
| C           | 1.47851                  | -2.5831 | -0.3587 | H      | 1.34927                  | -4.9632 | -2.8424 |
| C           | 0.02718                  | -2.5321 | -0.8356 | H      | 2.14115                  | -0.9149 | -1.6213 |
| C           | -0.1495                  | -3.5376 | -1.9239 | H      | -1.931                   | -1.9126 | -0.9483 |
| C           | 1.17379                  | -4.1892 | -2.1037 | H      | 0.0073                   | -0.6187 | 1.12681 |
| O           | -1.1755                  | -3.7629 | -2.545  | H      | 2.82596                  | -0.7644 | 1.36332 |
| C           | 2.17157                  | -1.2648 | -0.5905 | H      | -1.7297                  | 0.8771  | 1.69148 |
| C           | -0.9883                  | -1.7407 | -0.4299 | H      | -3.5214                  | -0.6355 | -0.3248 |
| C           | -0.9322                  | -0.7178 | 0.59293 | H      | -4.6497                  | 1.51353 | -0.6815 |
| C           | 2.75732                  | -0.4761 | 0.31901 | H      | -3.3932                  | 2.3729  | 0.2246  |
| C           | -1.9238                  | 0.13609 | 0.91918 | H      | -2.6752                  | 0.73688 | -2.2732 |
| C           | -3.2989                  | 0.21369 | 0.32474 | H      | -3.3281                  | 2.34499 | -2.4222 |
| C           | -3.583                   | 1.52149 | -0.437  | H      | 3.62128                  | 1.36086 | 2.00838 |
| C           | -2.7832                  | 1.68588 | -1.7341 | H      | 5.05611                  | 1.37616 | 0.99874 |
| C           | 3.30721                  | 0.85303 | -0.069  | H      | 4.57991                  | 3.69486 | 1.47524 |
| C           | 3.9942                   | 1.66794 | 1.02251 | H      | 4.12433                  | 3.42482 | -0.2066 |
| O           | 3.22417                  | 1.27228 | -1.2172 | H      | 1.70445                  | 3.15389 | 0.52879 |
| C           | 3.85496                  | 3.1838  | 0.82818 | H      | 2.19672                  | 3.48431 | 2.18415 |
| C           | 2.44151                  | 3.70009 | 1.13263 | H      | 3.00802                  | 5.76322 | 1.46971 |
| C           | 2.27226                  | 5.20249 | 0.87488 | H      | 2.50903                  | 5.41368 | -0.1779 |
| C           | 0.85917                  | 5.70414 | 1.19161 | H      | 0.754                    | 6.77226 | 0.96794 |
| O           | 1.44629                  | -2.9496 | 1.05427 | H      | 0.10993                  | 5.15638 | 0.60847 |
| O           | 3.63933                  | -3.5605 | 1.14813 | H      | 0.61928                  | 5.56238 | 2.25299 |
| C           | 2.55661                  | -3.4355 | 1.67278 | H      | 3.14243                  | -4.0996 | 3.61718 |
| C           | 2.22859                  | -3.8023 | 3.10188 | H      | 1.75994                  | -2.9588 | 3.61811 |
| C           | -1.4044                  | 2.30203 | -1.558  | H      | 1.51161                  | -4.6302 | 3.11457 |
| O           | -0.9778                  | 2.79952 | -0.5348 | H      | 1.28922                  | 2.26383 | -2.1597 |
| O           | -0.729                   | 2.26195 | -2.7195 | H      | 0.8726                   | 2.90005 | -3.7793 |
| C           | 0.57977                  | 2.86793 | -2.7293 | H      | 0.53546                  | 3.87668 | -2.3118 |
| O           | -4.2039                  | 0.1461  | 1.46805 | H      | -7.2168                  | -0.8448 | 2.33015 |
| O           | -5.8046                  | -0.8097 | 0.17518 | H      | -5.7151                  | -1.0258 | 3.2854  |
| C           | -5.4268                  | -0.4001 | 1.2508  | H      | -6.3305                  | 0.5893  | 2.93187 |
| C           | -6.2308                  | -0.4241 | 2.52976 |        |                          |         |         |

| Conformer 4 |                          |         |         |        |                          |         |         |
|-------------|--------------------------|---------|---------|--------|--------------------------|---------|---------|
| Atomic      | Standard Orientation (Å) |         |         | Atomic | Standard Orientation (Å) |         |         |
| Type        | X                        | Y       | Z       | Type   | X                        | Y       | Z       |
| C           | -0.8213                  | 3.57712 | -1.1011 | H      | -1.6908                  | 4.15912 | -0.8227 |
| C           | -0.3372                  | 2.44726 | -0.2005 | H      | -0.2333                  | 4.41125 | -3.018  |
| C           | 0.91852                  | 1.96537 | -0.9206 | H      | -1.1925                  | 0.67964 | 0.82587 |
| C           | 1.02462                  | 2.70933 | -2.2115 | H      | 2.65269                  | 0.91842 | -1.2666 |
| C           | -0.0843                  | 3.70114 | -2.2124 | H      | 1.15039                  | 0.59342 | 1.44837 |
| O           | 1.86456                  | 2.54201 | -3.0803 | H      | -2.5459                  | 1.64855 | -1.7499 |
| C           | -1.342                   | 1.32991 | -0.0344 | H      | 2.73355                  | -1.0607 | 2.02826 |
| C           | 1.85263                  | 1.06803 | -0.5427 | H      | 4.01535                  | -0.5989 | -0.7533 |
| C           | 1.90489                  | 0.34042 | 0.70875 | H      | 4.7248                   | -2.9146 | -0.6563 |
| C           | -2.3402                  | 1.03489 | -0.8759 | H      | 3.8736                   | -3.1797 | 0.87552 |
| C           | 2.81132                  | -0.6003 | 1.04655 | H      | 2.3275                   | -2.3592 | -1.6475 |
| C           | 3.92784                  | -1.1312 | 0.1958  | H      | 2.76814                  | -4.0235 | -1.3597 |
| C           | 3.83614                  | -2.6434 | -0.0781 | H      | -4.9118                  | 0.66949 | -1.6726 |
| C           | 2.58264                  | -3.0682 | -0.8511 | H      | -3.9659                  | -0.4832 | -2.5819 |
| C           | -3.2252                  | -0.138  | -0.6283 | H      | -6.0245                  | -1.619  | -2.0779 |
| C           | -4.3993                  | -0.3005 | -1.5855 | H      | -4.8181                  | -2.3302 | -1.0081 |
| O           | -3.0112                  | -0.9305 | 0.28045 | H      | -5.6197                  | -0.8732 | 0.86773 |
| C           | -5.3833                  | -1.4123 | -1.2107 | H      | -6.8221                  | -0.1518 | -0.1992 |
| C           | -6.2622                  | -1.0779 | 0.00236 | H      | -7.8854                  | -2.4115 | -0.5144 |
| C           | -7.2497                  | -2.1967 | 0.35685 | H      | -6.6895                  | -3.1203 | 0.56014 |
| C           | -8.1327                  | -1.8602 | 1.56275 | H      | -8.8244                  | -2.6785 | 1.79361 |
| O           | 0.08031                  | 2.93815 | 1.11555 | H      | -7.5259                  | -1.6739 | 2.45723 |
| O           | -2.0143                  | 3.66514 | 1.60993 | H      | -8.7318                  | -0.9602 | 1.37694 |
| C           | -0.8553                  | 3.5094  | 1.92159 | H      | 0.61699                  | 4.57545 | 3.06908 |
| C           | -0.2366                  | 3.91184 | 3.23922 | H      | -0.9865                  | 4.41358 | 3.85144 |
| C           | 1.36029                  | -3.2774 | 0.02906 | H      | 0.13772                  | 3.02631 | 3.76365 |
| O           | 1.37131                  | -3.3597 | 1.24018 | H      | -1.7069                  | -3.9218 | -0.7627 |
| O           | 0.2513                   | -3.4049 | -0.7225 | H      | -0.8452                  | -4.4422 | 0.72548 |
| C           | -0.977                   | -3.6395 | -0.0035 | H      | -1.3017                  | -2.7276 | 0.50207 |
| O           | 5.14636                  | -0.879  | 0.95906 | H      | 8.35722                  | -0.2849 | 0.58692 |
| O           | 6.348                    | -0.7401 | -0.9605 | H      | 7.25192                  | 0.48311 | 1.76582 |
| C           | 6.28681                  | -0.6925 | 0.24856 | H      | 7.57493                  | -1.2476 | 1.87721 |
| C           | 7.44842                  | -0.4174 | 1.17477 |        |                          |         |         |

| Conformer 5    |                           |         |         |                |                           |         |         |
|----------------|---------------------------|---------|---------|----------------|---------------------------|---------|---------|
| Atomic<br>Type | Standard Orientation (Å ) |         |         | Atomic<br>Type | Standard Orientation (Å ) |         |         |
|                | X                         | Y       | Z       |                | X                         | Y       | Z       |
| C              | 0.63291                   | 3.59675 | 1.13915 | H              | 1.39186                   | 4.29211 | 0.80352 |
| C              | 0.08804                   | 2.54041 | 0.18565 | H              | 0.3271                    | 4.13163 | 3.2216  |
| C              | -0.9812                   | 1.85326 | 1.02959 | H              | 0.87874                   | 0.99392 | -1.1895 |
| C              | -0.9164                   | 2.42192 | 2.40926 | H              | -2.5413                   | 0.60458 | 1.50974 |
| C              | 0.09489                   | 3.51216 | 2.3626  | H              | -1.5205                   | 0.7634  | -1.434  |
| O              | -1.5751                   | 2.06831 | 3.37334 | H              | 2.59823                   | 1.79761 | 1.21925 |
| C              | 1.13105                   | 1.5555  | -0.2915 | H              | -3.0453                   | -0.9604 | -1.9655 |
| C              | -1.8948                   | 0.9196  | 0.69156 | H              | -3.8452                   | -0.9735 | 1.0268  |
| C              | -2.1098                   | 0.3473  | -0.6217 | H              | -4.3773                   | -3.3194 | 0.7299  |
| C              | 2.2855                    | 1.26881 | 0.32186 | H              | -3.7947                   | -3.3075 | -0.9439 |
| C              | -2.9843                   | -0.6327 | -0.9307 | H              | -1.8922                   | -2.6505 | 1.37503 |
| C              | -3.8866                   | -1.3739 | 0.01198 | H              | -2.2463                   | -4.303  | 0.93858 |
| C              | -3.6298                   | -2.8912 | 0.05506 | H              | 5.0368                    | 1.07352 | 0.45001 |
| C              | -2.2293                   | -3.2792 | 0.5425  | H              | 4.35211                   | -0.1026 | 1.54293 |
| C              | 3.19986                   | 0.22484 | -0.2219 | H              | 4.93419                   | -1.9555 | -0.0809 |
| C              | 4.54552                   | 0.08786 | 0.47513 | H              | 5.61247                   | -0.7779 | -1.1816 |
| O              | 2.89042                   | -0.4762 | -1.1765 | H              | 7.31875                   | -0.1243 | 0.56359 |
| C              | 5.45387                   | -0.9895 | -0.1168 | H              | 6.63667                   | -1.3066 | 1.6701  |
| C              | 6.8038                    | -1.0961 | 0.60285 | H              | 7.20715                   | -3.147  | 0.05421 |
| C              | 7.7207                    | -2.1759 | 0.0139  | H              | 7.88804                   | -1.9653 | -1.0518 |
| C              | 9.06946                   | -2.2806 | 0.73275 | H              | 9.69989                   | -3.0594 | 0.28879 |
| O              | -0.5898                   | 3.14117 | -0.9664 | H              | 9.62202                   | -1.3344 | 0.67927 |
| O              | 1.32188                   | 4.13141 | -1.6919 | H              | 8.93578                   | -2.5253 | 1.7938  |
| C              | 0.14264                   | 3.89623 | -1.8294 | H              | -0.1384                   | 5.03648 | -3.6127 |
| C              | -0.7259                   | 4.38648 | -2.9636 | H              | -1.1066                   | 3.53566 | -3.5385 |
| C              | -1.1709                   | -3.2553 | -0.5493 | H              | -1.5917                   | 4.9283  | -2.5703 |
| O              | -1.3912                   | -3.1866 | -1.7411 | H              | 2.02776                   | -3.6889 | -0.3768 |
| O              | 0.06044                   | -3.3651 | -0.0179 | H              | 0.95671                   | -4.0959 | -1.7607 |
| C              | 1.15585                   | -3.3843 | -0.9564 | H              | 1.31742                   | -2.3877 | -1.3725 |
| O              | -5.2375                   | -1.1544 | -0.496  | H              | -8.3674                   | -0.9377 | 0.48261 |
| O              | -6.0856                   | -1.3734 | 1.59705 | H              | -7.553                    | 0.07762 | -0.745  |
| C              | -6.2443                   | -1.1722 | 0.41295 | H              | -7.754                    | -1.6499 | -1.0406 |
| C              | -7.5701                   |         | -0.9041 |                | -0.2605                   |         |         |

| Conformer 6 |                          |         |         |        |                          |         |         |
|-------------|--------------------------|---------|---------|--------|--------------------------|---------|---------|
| Atomic      | Standard Orientation (Å) |         |         | Atomic | Standard Orientation (Å) |         |         |
| Type        | X                        | Y       | Z       | Type   | X                        | Y       | Z       |
| C           | 0.27991                  | 3.83798 | 1.20683 | H      | 0.96669                  | 4.62023 | 0.89955 |
| C           | -0.0648                  | 2.70305 | 0.24449 | H      | -0.1807                  | 4.33777 | 3.26969 |
| C           | -1.0953                  | 1.90631 | 1.03721 | H      | 1.55822                  | 1.39828 | 0.8995  |
| C           | -1.1955                  | 2.50822 | 2.40295 | H      | -2.4269                  | 0.39276 | 1.46077 |
| C           | -0.2966                  | 3.69348 | 2.406   | H      | -1.1814                  | 0.66048 | -1.3894 |
| O           | -1.8731                  | 2.09327 | 3.32793 | H      | 1.40617                  | 2.15563 | -2.0835 |
| C           | 1.1815                   | 1.87837 | 0.00023 | H      | -2.1851                  | -1.4183 | -1.9326 |
| C           | -1.7785                  | 0.79961 | 0.68611 | H      | -3.3042                  | -1.4699 | 0.94841 |
| C           | -1.7328                  | 0.14515 | -0.6075 | H      | -2.9323                  | -3.8752 | 0.94199 |
| C           | 1.79597                  | 1.70267 | -1.1769 | H      | -2.0885                  | -3.8041 | -0.6103 |
| C           | -2.2958                  | -1.0404 | -0.9177 | H      | -1.075                   | -2.3819 | 1.93493 |
| C           | -3.0345                  | -1.9589 | 0.01002 | H      | -0.6296                  | -4.0206 | 1.4846  |
| C           | -2.2719                  | -3.2607 | 0.32178 | H      | 3.95621                  | 1.10356 | 0.5062  |
| C           | -0.9494                  | -3.0512 | 1.07864 | H      | 3.054                    | -0.3932 | 0.34329 |
| C           | 2.98984                  | 0.83812 | -1.3911 | H      | 4.78512                  | -1.2695 | -1.2634 |
| C           | 3.74015                  | 0.28028 | -0.1897 | H      | 5.68775                  | 0.22041 | -1.1214 |
| O           | 3.32966                  | 0.58199 | -2.5401 | H      | 6.00794                  | -0.2024 | 1.34838 |
| C           | 5.02739                  | -0.458  | -0.5658 | H      | 5.09644                  | -1.6972 | 1.20805 |
| C           | 5.76549                  | -1.0216 | 0.65444 | H      | 6.8129                   | -2.5905 | -0.4003 |
| C           | 7.05411                  | -1.7709 | 0.29148 | H      | 7.7219                   | -1.095  | -0.2613 |
| C           | 7.79086                  | -2.3322 | 1.5118  | H      | 8.70523                  | -2.8612 | 1.21959 |
| O           | -0.506                   | 3.17978 | -1.0508 | H      | 8.07663                  | -1.5317 | 2.2053  |
| O           | -2.2883                  | 4.29734 | -0.1857 | H      | 7.16                     | -3.0383 | 2.06587 |
| C           | -1.6228                  | 3.96125 | -1.1342 | H      | -2.7428                  | 5.00221 | -2.6234 |
| C           | -1.8909                  | 4.32324 | -2.5762 | H      | -1.0093                  | 4.79327 | -3.023  |
| C           | 0.22712                  | -2.5264 | 0.2729  | H      | -2.1085                  | 3.41886 | -3.1546 |
| O           | 1.04738                  | -1.7345 | 0.6893  | H      | 1.32659                  | -3.3103 | -2.6754 |
| O           | 0.29627                  | -3.1023 | -0.9457 | H      | 1.38469                  | -1.6538 | -1.9943 |
| C           | 1.41775                  | -2.7208 | -1.7629 | H      | 2.35742                  | -2.9478 | -1.2531 |
| O           | -4.2685                  | -2.3042 | -0.6842 | H      | -7.3841                  | -3.1961 | -0.1332 |
| O           | -5.3132                  | -2.6474 | 1.29981 | H      | -6.8134                  | -2.0202 | -1.3536 |
| C           | -5.3396                  | -2.6166 | 0.0893  | H      | -6.3222                  | -3.7102 | -1.48   |
| C           | -6.5473                  | -2.9078 | -0.7701 |        |                          |         |         |

| Conformer 7 |                          |         |         |        |                          |         |         |
|-------------|--------------------------|---------|---------|--------|--------------------------|---------|---------|
| Atomic      | Standard Orientation (Å) |         |         | Atomic | Standard Orientation (Å) |         |         |
| Type        | X                        | Y       | Z       | Type   | X                        | Y       | Z       |
| C           | -1.024                   | 3.86668 | -0.6633 | H      | -1.8251                  | 4.456   | -0.2284 |
| C           | -0.3943                  | 2.72058 | 0.12646 | H      | -0.8146                  | 4.692   | -2.6612 |
| C           | 0.69598                  | 2.23642 | -0.8136 | H      | -2.0209                  | 1.90792 | 1.37912 |
| C           | 0.5895                   | 3.00937 | -2.0895 | H      | 2.27562                  | 1.07831 | -1.4684 |
| C           | -0.5146                  | 3.98654 | -1.8952 | H      | 1.171                    | 0.77449 | 1.43702 |
| O           | 1.26781                  | 2.84967 | -3.0905 | H      | -1.2813                  | 0.37912 | -1.1807 |
| C           | -1.4618                  | 1.70034 | 0.46821 | H      | 2.5659                   | -1.1307 | 1.66775 |
| C           | 1.60799                  | 1.26266 | -0.6273 | H      | 3.79455                  | -0.5153 | -1.0586 |
| C           | 1.762                    | 0.47057 | 0.5771  | H      | 1.88926                  | -1.8415 | -1.7933 |
| C           | -1.7993                  | 0.62951 | -0.2587 | H      | 3.38408                  | -2.7722 | -1.8637 |
| C           | 2.55044                  | -0.614  | 0.71036 | H      | 1.82481                  | -4.3127 | -0.9744 |
| C           | 3.39014                  | -1.2525 | -0.3606 | H      | 2.6272                   | -3.7495 | 0.49036 |
| C           | 2.65306                  | -2.3308 | -1.1792 | H      | -3.5371                  | -0.7484 | -1.8203 |
| C           | 1.98787                  | -3.4335 | -0.3378 | H      | -2.5538                  | -1.9546 | -1.0219 |
| C           | -2.9201                  | -0.2627 | 0.1708  | H      | -4.775                   | -2.8994 | -1.1368 |
| C           | -3.3998                  | -1.2703 | -0.861  | H      | -4.5287                  | -2.4416 | 0.54734 |
| O           | -3.3957                  | -0.1925 | 1.29669 | H      | -5.8337                  | -0.3386 | 0.17312 |
| C           | -4.6635                  | -2.0383 | -0.4641 | H      | -6.0742                  | -0.7794 | -1.5163 |
| C           | -5.9447                  | -1.1943 | -0.5048 | H      | -7.3065                  | -2.8503 | -0.7912 |
| C           | -7.2013                  | -1.9852 | -0.1204 | H      | -7.0718                  | -2.3976 | 0.89026 |
| C           | -8.4812                  | -1.1444 | -0.1676 | H      | -9.3602                  | -1.7354 | 0.11444 |
| O           | 0.07756                  | 3.14906 | 1.44495 | H      | -8.419                   | -0.291  | 0.51878 |
| O           | 1.54533                  | 4.66608 | 0.59354 | H      | -8.6572                  | -0.746  | -1.1746 |
| C           | 1.03725                  | 4.11369 | 1.5389  | H      | 2.07196                  | 5.20011 | 3.0583  |
| C           | 1.36701                  | 4.37085 | 2.9916  | H      | 0.45826                  | 4.60114 | 3.55621 |
| C           | 0.61668                  | -3.0357 | 0.18002 | H      | 1.81112                  | 3.47419 | 3.43726 |
| O           | -0.2464                  | -2.513  | -0.4968 | H      | -0.785                   | -3.3998 | 3.07766 |
| O           | 0.45217                  | -3.3669 | 1.47539 | H      | -1.0618                  | -2.0089 | 1.97792 |
| C           | -0.8423                  | -3.0773 | 2.03796 | H      | -1.6211                  | -3.6322 | 1.5084  |
| O           | 4.51334                  | -1.8565 | 0.34437 | H      | 7.67385                  | -2.6772 | -0.0389 |
| O           | 5.82808                  | -1.6121 | -1.4876 | H      | 6.93132                  | -1.9341 | 1.40841 |
| C           | 5.68211                  | -1.9643 | -0.3383 | H      | 6.43033                  | -3.5498 | 0.90751 |
| C           | 6.75353                  | -2.5719 | 0.53624 |        |                          |         |         |

| Conformer 8 |                          |         |         |        |                          |         |         |
|-------------|--------------------------|---------|---------|--------|--------------------------|---------|---------|
| Atomic      | Standard Orientation (Å) |         |         | Atomic | Standard Orientation (Å) |         |         |
| Type        | X                        | Y       | Z       | Type   | X                        | Y       | Z       |
| C           | -0.3053                  | -4.3534 | -0.6215 | H      | 0.27783                  | -5.1761 | -0.2198 |
| C           | -0.3485                  | -3.0115 | 0.10852 | H      | -1.0744                  | -5.1435 | -2.493  |
| C           | -1.3242                  | -2.2134 | -0.7361 | H      | 1.70756                  | -2.9932 | 0.89791 |
| C           | -1.6749                  | -3.0315 | -1.9398 | H      | -2.5213                  | -0.636  | -1.3068 |
| C           | -0.9872                  | -4.3382 | -1.7732 | H      | -0.9702                  | -0.5435 | 1.40308 |
| O           | -2.3807                  | -2.68   | -2.8705 | H      | 1.01874                  | -0.9399 | -1.2779 |
| C           | 1.06528                  | -2.4752 | 0.18677 | H      | -1.7303                  | 1.7003  | 1.63078 |
| C           | -1.8383                  | -0.9849 | -0.5327 | H      | -3.4906                  | 1.30476 | -0.8284 |
| C           | -1.5745                  | -0.1241 | 0.603   | H      | -1.412                   | 1.96466 | -1.934  |
| C           | 1.6039                   | -1.4999 | -0.5537 | H      | -2.6096                  | 3.25852 | -1.946  |
| C           | -2.0016                  | 1.14768 | 0.7338  | H      | -0.5626                  | 4.35839 | -1.4617 |
| C           | -2.7903                  | 1.93594 | -0.2758 | H      | -1.3149                  | 4.23395 | 0.13043 |
| C           | -1.9265                  | 2.69636 | -1.3016 | H      | 3.38242                  | -0.5558 | -2.4208 |
| C           | -0.8871                  | 3.65058 | -0.6886 | H      | 2.97614                  | 0.75585 | -1.3455 |
| C           | 3.0567                   | -1.1604 | -0.4178 | H      | 5.64308                  | -0.7767 | -1.1856 |
| C           | 3.59488                  | -0.1507 | -1.4187 | H      | 5.43323                  | 0.65776 | -2.1875 |
| O           | 3.75859                  | -1.6863 | 0.43493 | H      | 4.87074                  | 2.00656 | -0.1567 |
| C           | 5.08644                  | 0.16502 | -1.2693 | H      | 5.06148                  | 0.57008 | 0.85152 |
| C           | 5.41929                  | 1.05601 | -0.0647 | H      | 7.46451                  | 0.40419 | 0.16542 |
| C           | 6.91796                  | 1.35289 | 0.07083 | H      | 7.28151                  | 1.82336 | -0.8542 |
| C           | 7.24945                  | 2.25307 | 1.26545 | H      | 8.32645                  | 2.44302 | 1.33844 |
| O           | -0.7224                  | -3.1505 | 1.51749 | H      | 6.74593                  | 3.22461 | 1.18243 |
| O           | -2.7277                  | -4.1156 | 1.0406  | H      | 6.92787                  | 1.79328 | 2.20814 |
| C           | -1.9237                  | -3.7087 | 1.84372 | H      | -3.0093                  | -4.2589 | 3.59835 |
| C           | -2.0918                  | -3.7264 | 3.34591 | H      | -1.2319                  | -4.2066 | 3.82284 |
| C           | 0.36635                  | 2.93378 | -0.2207 | H      | -2.1468                  | -2.7004 | 3.72594 |
| O           | 0.99844                  | 2.14427 | -0.8936 | H      | 2.02139                  | 3.0738  | 2.56076 |
| O           | 0.71575                  | 3.29765 | 1.03002 | H      | 1.79728                  | 1.59349 | 1.56962 |
| C           | 1.90709                  | 2.68086 | 1.55034 | H      | 2.77386                  | 2.94105 | 0.93777 |
| O           | -3.5735                  | 2.88433 | 0.50475 | H      | -6.402                   | 4.55997 | 0.46552 |
| O           | -5.1814                  | 2.91177 | -1.0947 | H      | -5.6782                  | 3.72278 | 1.87019 |
| C           | -4.7614                  | 3.28068 | -0.0207 | H      | -4.8315                  | 5.08875 | 1.14227 |
| C           | -5.469                   | 4.22667 | 0.92072 |        |                          |         |         |

| Conformer 9    |                           |         |         |                |                           |         |         |
|----------------|---------------------------|---------|---------|----------------|---------------------------|---------|---------|
| Atomic<br>Type | Standard Orientation (Å ) |         |         | Atomic<br>Type | Standard Orientation (Å ) |         |         |
|                | X                         | Y       | Z       |                | X                         | Y       | Z       |
| C              | 1.73245                   | 2.75292 | 1.81792 | H              | 2.49752                   | 3.51407 | 1.73158 |
| C              | 0.8893                    | 2.37411 | 0.60749 | H              | 1.89637                   | 2.08498 | 3.87841 |
| C              | -0.0869                   | 1.355   | 1.18935 | H              | 1.20033                   | 1.7778  | -1.5024 |
| C              | 0.3246                    | 1.07936 | 2.59674 | H              | -1.6876                   | 0.05657 | 1.26627 |
| C              | 1.42825                   | 2.02757 | 2.90215 | H              | -1.2011                   | 1.77912 | -1.2874 |
| O              | -0.1456                   | 0.23599 | 3.34581 | H              | 3.4059                    | 1.10365 | 0.51476 |
| C              | 1.68342                   | 1.76841 | -0.5267 | H              | -2.8745                   | 0.4866  | -2.3573 |
| C              | -1.1566                   | 0.75747 | 0.62341 | H              | -3.3161                   | -0.9826 | 0.30605 |
| C              | -1.6489                   | 0.96517 | -0.7242 | H              | -3.5029                   | -3.0777 | -0.9903 |
| C              | 2.86659                   | 1.15088 | -0.428  | H              | -2.8944                   | -2.2725 | -2.4407 |
| C              | -2.6045                   | 0.23318 | -1.3324 | H              | -1.0638                   | -3.5505 | -1.4517 |
| C              | -3.3377                   | -0.9584 | -0.7831 | H              | -0.6822                   | -1.8564 | -1.2477 |
| C              | -2.825                    | -2.2955 | -1.3467 | H              | 5.19491                   | -0.4469 | -2.4311 |
| C              | -1.3882                   | -2.6355 | -0.9396 | H              | 5.5382                    | 0.6124  | -1.0493 |
| C              | 3.47881                   | 0.50428 | -1.6268 | H              | 5.85963                   | -1.7359 | -0.4097 |
| C              | 4.8426                    | -0.1446 | -1.4399 | H              | 4.55887                   | -1.0311 | 0.5315  |
| O              | 2.90808                   | 0.49237 | -2.7085 | H              | 2.85549                   | -2.139  | -0.9112 |
| C              | 4.83142                   | -1.3565 | -0.4823 | H              | 4.11624                   | -2.7627 | -1.9633 |
| C              | 3.89642                   | -2.4916 | -0.9206 | H              | 5.04371                   | -4.1177 | -0.0761 |
| C              | 4.01232                   | -3.739  | -0.035  | H              | 3.83535                   | -3.4566 | 1.01331 |
| C              | 3.03716                   | -4.8517 | -0.4332 | H              | 3.16315                   | -5.738  | 0.19947 |
| O              | 0.09836                   | 3.50394 | 0.11624 | H              | 1.99903                   | -4.5135 | -0.3357 |
| O              | 1.96                      | 4.6992  | -0.3996 | H              | 3.19433                   | -5.1615 | -1.4738 |
| C              | 0.75492                   | 4.59134 | -0.3719 | H              | 0.30731                   | 6.50976 | -1.1954 |
| C              | -0.2328                   | 5.623   | -0.8626 | H              | -0.8205                   | 5.21473 | -1.6916 |
| C              | -1.2318                   | -2.8655 | 0.55392 | H              | -0.934                    | 5.88508 | -0.0641 |
| O              | -2.1461                   | -2.9445 | 1.34829 | H              | 1.39811                   | -3.2796 | 2.39348 |
| O              | 0.06663                   | -2.9734 | 0.89801 | H              | 0.00297                   | -2.2449 | 2.85259 |
| C              | 0.32015                   | -3.1388 | 2.31056 | H              | -0.2132                   | -4.0119 | 2.69384 |
| O              | -4.7281                   | -0.8796 | -1.2045 | H              | -7.598                    | 0.50341 | -0.3911 |
| O              | -5.1886                   | 0.51348 | 0.52671 | H              | -6.9753                   | 0.1648  | -2.0353 |
| C              | -5.5509                   | -0.1076 | -0.4458 | H              | -7.3447                   | -1.176  | -0.9497 |
| C              | -6.9612                   | -0.1509 | -0.9872 |                |                           |         |         |



| Conformer 10 |                          |         |         |        |                          |         |         |
|--------------|--------------------------|---------|---------|--------|--------------------------|---------|---------|
| Atomic       | Standard Orientation (Å) |         |         | Atomic | Standard Orientation (Å) |         |         |
| Type         | X                        | Y       | Z       | Type   | X                        | Y       | Z       |
| C            | 0.26533                  | 3.68237 | 1.44494 | H      | 0.97792                  | 4.49444 | 1.34162 |
| C            | 0.01246                  | 2.73325 | 0.27645 | H      | -0.3706                  | 3.81538 | 3.51851 |
| C            | -1.0963                  | 1.83943 | 0.81867 | H      | 1.49835                  | 1.24724 | 0.86197 |
| C            | -1.2927                  | 2.17566 | 2.26096 | H      | -2.4397                  | 0.2778  | 0.85663 |
| C            | -0.4134                  | 3.33784 | 2.54668 | H      | -1.0827                  | 1.08205 | -1.8289 |
| O            | -2.0126                  | 1.58342 | 3.05187 | H      | 1.78767                  | 2.59134 | -1.8989 |
| C            | 1.26428                  | 1.91423 | 0.03644 | H      | -1.7619                  | -1.0279 | -2.6986 |
| C            | -1.7354                  | 0.81528 | 0.22304 | H      | -2.8419                  | -1.6623 | 0.13155 |
| C            | -1.5691                  | 0.3827  | -1.1538 | H      | -1.9449                  | -3.8742 | -0.0418 |
| C            | 2.03045                  | 1.94353 | -1.0619 | H      | -1.3356                  | -3.5872 | -1.6768 |
| C            | -1.9367                  | -0.8182 | -1.644  | H      | 0.5118                   | -3.6349 | -0.0586 |
| C            | -2.4882                  | -1.9674 | -0.8536 | H      | 0.42412                  | -2.0618 | -0.8321 |
| C            | -1.4813                  | -3.1266 | -0.692  | H      | 3.98328                  | 0.82955 | 0.70715 |
| C            | -0.1022                  | -2.7276 | -0.1431 | H      | 2.89809                  | -0.4374 | 0.19468 |
| C            | 3.23672                  | 1.0959  | -1.2775 | H      | 4.65656                  | -1.2823 | -1.4159 |
| C            | 3.7294                   | 0.19185 | -0.1537 | H      | 5.74469                  | -0.0167 | -0.8966 |
| O            | 3.8079                   | 1.14997 | -2.3587 | H      | 5.66016                  | -0.9112 | 1.46571 |
| C            | 4.93194                  | -0.6678 | -0.5508 | H      | 4.61151                  | -2.214  | 0.93193 |
| C            | 5.42593                  | -1.5512 | 0.60261 | H      | 7.47765                  | -1.7356 | -0.06   |
| C            | 6.66472                  | -2.399  | 0.2682  | H      | 7.0188                   | -2.8801 | 1.19003 |
| C            | 6.4277                   | -3.4783 | -0.795  | H      | 7.32956                  | -4.0814 | -0.9514 |
| O            | -0.2825                  | 3.42545 | -0.9602 | H      | 5.62164                  | -4.159  | -0.4922 |
| O            | -2.1168                  | 4.45514 | -0.0965 | H      | 6.1507                   | -3.0456 | -1.7627 |
| C            | -1.366                   | 4.25465 | -1.0197 | H      | -2.3076                  | 5.56672 | -2.4152 |
| C            | -1.476                   | 4.86171 | -2.3985 | H      | -0.545                   | 5.37103 | -2.6666 |
| C            | -0.0617                  | -2.0531 | 1.21917 | H      | -1.6443                  | 4.07556 | -3.1423 |
| O            | 0.80025                  | -1.2671 | 1.56375 | H      | -1.8934                  | -2.4284 | 3.8616  |
| O            | -1.0661                  | -2.4553 | 2.01449 | H      | -0.1421                  | -2.0243 | 3.83964 |
| C            | -1.1044                  | -1.8854 | 3.34169 | H      | -1.3448                  | -0.8207 | 3.28988 |
| O            | -3.63                    | -2.4658 | -1.6078 | H      | -6.5671                  | -3.8935 | -1.2341 |
| O            | -4.6588                  | -3.1095 | 0.31006 | H      | -6.1513                  | -2.5809 | -2.376  |
| C            | -4.6533                  | -3.005  | -0.896  | H      | -5.3876                  | -4.1614 | -2.5534 |
| C            | -5.7659                  | -3.442  | -1.82   |        |                          |         |         |

Table S5. Experimental and calculated  $^1\text{H}$  NMR data for compound **1**.

| No.   | <b>1</b> , exptl. $\delta_{\text{H}}$ <sup>a</sup> | 4 <i>R</i> ,12 <i>S</i> - <b>1</b> , calcd. $\delta_{\text{H}}$ <sup>b</sup> | 4 <i>S</i> ,12 <i>S</i> - <b>1</b> , calcd. $\delta_{\text{H}}$ <sup>b</sup> |
|-------|----------------------------------------------------|------------------------------------------------------------------------------|------------------------------------------------------------------------------|
| 2     | 2.38                                               | 2.59                                                                         | 2.41                                                                         |
|       | 1.29                                               | 2.44                                                                         | 2.28                                                                         |
| 3     | 2.05                                               | 2.45                                                                         | 2.29                                                                         |
|       | 1.95                                               | 1.87                                                                         | 2.15                                                                         |
| 4     | 5.75                                               | 5.59                                                                         | 5.74                                                                         |
| 5     | 5.84                                               | 6.16                                                                         | 6.45                                                                         |
| 6     | 6.35                                               | 6.74                                                                         | 7.09                                                                         |
| 7     | 7.39                                               | 7.92                                                                         | 7.75                                                                         |
| 10    | 6.55                                               | 6.82                                                                         | 6.93                                                                         |
| 11    | 7.48                                               | 7.62                                                                         | 8.38                                                                         |
| 13    | 6.77                                               | 7.36                                                                         | 7.53                                                                         |
| 14    | 6.31                                               | 6.54                                                                         | 6.59                                                                         |
| 16    | 2.53                                               | 2.55                                                                         | 2.62                                                                         |
| 17    | 1.59                                               | 1.62                                                                         | 1.58                                                                         |
| 18    | 1.29                                               | 1.02                                                                         | 1.15                                                                         |
| 19    | 1.29                                               | 1.23                                                                         | 1.34                                                                         |
| 20    | 0.88                                               | 0.92                                                                         | 0.79                                                                         |
| 1-OMe | 3.7                                                | 3.87                                                                         | 3.70                                                                         |
| 2'    | 2.04                                               | 2.20                                                                         | 2.14                                                                         |
| 2''   | 2.09                                               | 2.09                                                                         | 2.11                                                                         |

<sup>a</sup> Recorded in  $\text{CDCl}_3$  at 600 MHz.<sup>b</sup> Calculated in  $\text{CDCl}_3$

Table S6. Experimental and calculated  $^{13}\text{C}$  NMR data for compound **1**.

| No.   | <b>1</b> , exptl. $\delta_{\text{C}}$ <sup>a</sup> | 4 <i>R</i> ,12 <i>S</i> - <b>1</b> , calcd. $\delta_{\text{C}}$ <sup>b</sup> | 4 <i>S</i> ,12 <i>S</i> - <b>1</b> , calcd. $\delta_{\text{C}}$ <sup>b</sup> |
|-------|----------------------------------------------------|------------------------------------------------------------------------------|------------------------------------------------------------------------------|
| 1     | 172.9                                              | 178.2                                                                        | 179.6                                                                        |
| 2     | 29.7                                               | 28.2                                                                         | 27.1                                                                         |
| 3     | 29.7                                               | 26.8                                                                         | 25.5                                                                         |
| 4     | 69.3                                               | 68.1                                                                         | 66.1                                                                         |
| 5     | 140                                                | 144.1                                                                        | 144.9                                                                        |
| 6     | 124.4                                              | 126.2                                                                        | 126.5                                                                        |
| 7     | 126.6                                              | 129.2                                                                        | 127.7                                                                        |
| 8     | 135.7                                              | 132.4                                                                        | 131.6                                                                        |
| 9     | 192.7                                              | 192.9                                                                        | 191.4                                                                        |
| 10    | 136.4                                              | 139.8                                                                        | 140.3                                                                        |
| 11    | 155                                                | 156.2                                                                        | 157.3                                                                        |
| 12    | 83.5                                               | 80.7                                                                         | 79.5                                                                         |
| 13    | 141                                                | 144.7                                                                        | 143.5                                                                        |
| 14    | 129.2                                              | 131.0                                                                        | 130.5                                                                        |
| 15    | 199.6                                              | 204.8                                                                        | 202.6                                                                        |
| 16    | 41.2                                               | 39.7                                                                         | 42.3                                                                         |
| 17    | 23.5                                               | 26.4                                                                         | 23.4                                                                         |
| 18    | 31.3                                               | 30.3                                                                         | 30.3                                                                         |
| 19    | 22.4                                               | 21.9                                                                         | 22.2                                                                         |
| 20    | 13.9                                               | 11.0                                                                         | 10.9                                                                         |
| 1-OMe | 51.9                                               | 48.4                                                                         | 49.3                                                                         |
| 1'    | 170                                                | 175.4                                                                        | 174.5                                                                        |
| 2'    | 21.3                                               | 18.0                                                                         | 17.8                                                                         |
| 1''   | 168.8                                              | 172.5                                                                        | 174.4                                                                        |
| 2''   | 21.2                                               | 18.3                                                                         | 18.4                                                                         |

<sup>a</sup> Recorded in CDCl<sub>3</sub> at 600 MHz.<sup>b</sup> Calculated in CDCl<sub>3</sub>

Table S7. DP4+ analyses of calculated and experimental NMR chemical shifts of **1** (unscaled). Isomer 1: 4*R*,12*S*-**1**; Isomer 2: 4*S*,12*S*-**1**

| Functional       | Solvent? | Basis Set    | Type of Data    |          |          |          |
|------------------|----------|--------------|-----------------|----------|----------|----------|
| mPW1PW91         | PCM      | 6-311+G(d,p) | Unscaled Shifts |          |          |          |
|                  | Isomer 1 | Isomer 2     | Isomer 3        | Isomer 4 | Isomer 5 | Isomer 6 |
| sDP4+ (H data)   | 84.32%   | 15.68%       | -               | -        | -        | -        |
| sDP4+ (C data)   | 99.51%   | 0.49%        | -               | -        | -        | -        |
| sDP4+ (all data) | 99.91%   | 0.09%        | -               | -        | -        | -        |
| uDP4+ (H data)   | 96.66%   | 3.34%        | -               | -        | -        | -        |
| uDP4+ (C data)   | 99.93%   | 0.07%        | -               | -        | -        | -        |
| uDP4+ (all data) | 100.00%  | 0.00%        | -               | -        | -        | -        |
| DP4+ (H data)    | 99.36%   | 0.64%        | -               | -        | -        | -        |
| DP4+ (C data)    | 100.00%  | 0.00%        | -               | -        | -        | -        |
| DP4+ (all data)  | 100.00%  | 0.00%        | -               | -        | -        | -        |

| Functional | Solvent? | Basis Set    | Type of Data    |            |          |          |          |
|------------|----------|--------------|-----------------|------------|----------|----------|----------|
| mPW1PW91   | PCM      | 6-311+G(d,p) | Unscaled Shifts |            |          |          |          |
|            | DP4+     | 100.00%      | 0.00%           | -          | -        | -        | -        |
| Nuclei     | sp2?     | Experimenta  | Isomer 1        | Isomer 2   | Isomer 3 | Isomer 4 | Isomer 5 |
| C          | x        | 172.9        | 178.2           | 179.6      |          |          |          |
| C          |          | 29.7         | 28.2            | 27.1       |          |          |          |
| C          |          | 29.7         | 26.8            | 25.5       |          |          |          |
| C          |          | 69.3         | 68.1            | 66.1       |          |          |          |
| C          | x        | 140.0        | 144.1           | 144.9      |          |          |          |
| C          | x        | 124.4        | 126.2           | 126.5      |          |          |          |
| C          | x        | 126.6        | 129.2           | 127.7      |          |          |          |
| C          | x        | 135.7        | 132.4           | 131.6      |          |          |          |
| C          | x        | 192.7        | 192.9           | 191.4      |          |          |          |
| C          | x        | 136.4        | 139.8           | 140.3      |          |          |          |
| C          | x        | 155.0        | 156.2           | 157.3      |          |          |          |
| C          |          | 83.5         | 80.65           | 79.53      |          |          |          |
| C          | x        | 141.0        | 144.66          | 143.50     |          |          |          |
| C          | x        | 129.2        | 130.97          | 130.53     |          |          |          |
| C          | x        | 199.6        | 204.78          | 202.58     |          |          |          |
| C          |          | 41.2         | 39.67           | 42.29      |          |          |          |
| C          |          | 23.5         | 26.36           | 23.41      |          |          |          |
| C          |          | 31.3         | 30.32           | 30.25      |          |          |          |
| C          |          | 22.4         | 21.89           | 22.18      |          |          |          |
| C          |          | 13.9         | 10.98           | 10.91      |          |          |          |
| C          |          | 51.9         | 48.37           | 49.26      |          |          |          |
| C          | x        | 170.0        | 175.41          | 174.47     |          |          |          |
| C          |          | 21.3         | 18.04           | 17.76      |          |          |          |
| C          | x        | 168.8        | 172.50          | 174.36     |          |          |          |
| C          |          | 21.2         | 18.30           | 18.42      |          |          |          |
| H          |          | 2.38         | 2.58518849      | 2.41448727 |          |          |          |
| H          |          | 1.29         | 2.43990968      | 2.27709942 |          |          |          |
| H          |          | 2.05         | 2.44954676      | 2.29200722 |          |          |          |
| H          |          | 1.95         | 1.87121344      | 2.1475089  |          |          |          |
| H          |          | 5.75         | 5.59041485      | 5.73881978 |          |          |          |
| H          | x        | 5.84         | 6.16074762      | 6.4481194  |          |          |          |
| H          | x        | 6.35         | 6.73651802      | 7.08593171 |          |          |          |
| H          | x        | 7.39         | 7.91950138      | 7.75119996 |          |          |          |
| H          | x        | 6.55         | 6.81510378      | 6.93090113 |          |          |          |
| H          | x        | 7.48         | 7.61945923      | 8.37815606 |          |          |          |
| H          | x        | 6.77         | 7.35598783      | 7.53311107 |          |          |          |
| H          | x        | 6.31         | 6.54216996      | 6.58805942 |          |          |          |
| H          |          | 2.53         | 2.55168596      | 2.61700834 |          |          |          |
| H          |          | 1.59         | 1.61731089      | 1.57946925 |          |          |          |
| H          |          | 1.29         | 1.01922143      | 1.14774555 |          |          |          |
| H          |          | 1.29         | 1.22741903      | 1.3361358  |          |          |          |
| H          |          | 0.88         | 0.91671997      | 0.79032632 |          |          |          |
| H          |          | 3.70         | 3.87041314      | 3.70000147 |          |          |          |
| H          |          | 2.04         | 2.19913453      | 2.14469985 |          |          |          |
| H          |          | 2.09         | 2.08721569      | 2.10528836 |          |          |          |

Table S8. Energy analyses of 7*S*,8*R*,12*R*-2/7*R*,8*S*,12*S*-2 (eleven conformers)

| NO. | 3D conformers<br>B3LYP/6-31G(d,p)                                                   | G (Hartree)  | Boltzmann<br>distribution | Calculated ECD spectrum                                                              |
|-----|-------------------------------------------------------------------------------------|--------------|---------------------------|--------------------------------------------------------------------------------------|
|     |                                                                                     |              |                           | 7 <i>S</i> ,8 <i>R</i> ,12 <i>R</i> -2                                               |
| 1   | 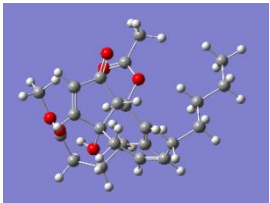   | -1347.768036 | 3.55 %                    |    |
| 2   |    | -1347.766188 | 0.5 %                     |    |
| 3   |  | -1347.766520 | 0.71 %                    |  |
| 4   |  | -1347.770379 | 42.49 %                   |  |
| 5   |  | -1347.766810 | 0.97 %                    |  |

|    |                                                                                     |              |         |                                                                                      |
|----|-------------------------------------------------------------------------------------|--------------|---------|--------------------------------------------------------------------------------------|
| 6  | 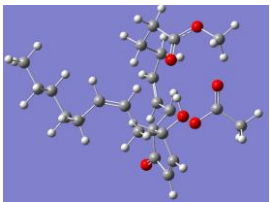   | -1347.768948 | 9.33 %  |    |
| 7  |    | -1347.768453 | 5.53 %  |    |
| 8  |   | -1347.770035 | 29.51 % |   |
| 9  |  | -1347.767498 | 2.01 %  |  |
| 10 |  | -1347.767665 | 2.4 %   |  |
| 11 |  | -1347.767761 | 2.66 %  |  |

Table S9. Cartesian coordinates of the low-energy re-optimized conformers of 7*S*,8*R*,12*R*-2/7*R*,8*S*,12*S*-2 calculated at B3LYP/6-31G(d,p) level of theory.

| Conformer 1 |                          |         |         |        |                          |         |         |
|-------------|--------------------------|---------|---------|--------|--------------------------|---------|---------|
| Atomic      | Standard Orientation (Å) |         |         | Atomic | Standard Orientation (Å) |         |         |
| Type        | X                        | Y       | Z       | Type   | X                        | Y       | Z       |
| C           | -0.288                   | -0.0857 | 3.1934  | H      | 1.17168                  | -3.3259 | 1.67923 |
| C           | -0.292                   | -1.3387 | 2.72446 | H      | 2.21528                  | -1.9234 | 1.91488 |
| C           | 0.194                    | -1.4659 | 1.29198 | H      | 1.26167                  | -2.8627 | -0.8733 |
| C           | 0.48856                  | 0.02354 | 0.87213 | H      | 3.50041                  | -2.7117 | -1.5765 |
| C           | 0.21157                  | 0.84465 | 2.15904 | H      | 4.23048                  | -1.8664 | 1.31276 |
| O           | 0.40106                  | 2.03829 | 2.31081 | H      | 5.11803                  | -3.0666 | 0.38979 |
| C           | 1.46113                  | -2.3557 | 1.24909 | H      | 6.32672                  | -0.9914 | 0.23349 |
| C           | 2.0085                   | -2.5769 | -0.136  | H      | 5.66647                  | -1.3523 | -1.3544 |
| C           | 3.2869                   | -2.4894 | -0.5284 | H      | 3.78623                  | 0.27084 | -0.936  |
| C           | 4.50677                  | -2.156  | 0.29167 | H      | 4.4479                   | 0.62519 | 0.65312 |
| C           | 5.38712                  | -1.0537 | -0.333  | H      | 6.55978                  | 1.47502 | -0.4191 |
| C           | 4.7266                   | 0.32951 | -0.3699 | H      | 5.89409                  | 1.12395 | -2.006  |
| C           | 5.6176                   | 1.41739 | -0.983  | H      | 5.60974                  | 3.55067 | -1.4572 |
| C           | 4.95197                  | 2.79717 | -1.0088 | H      | 4.02138                  | 2.77727 | -1.5891 |
| O           | -0.7858                  | -2.1463 | 0.51651 | H      | 4.69957                  | 3.13415 | 0.00396 |
| C           | -0.326                   | 0.53267 | -0.341  | H      | -1.6677                  | -1.7438 | 0.65629 |
| C           | 0.06107                  | -0.0963 | -1.6547 | H      | -1.3896                  | 0.42627 | -0.1407 |
| C           | -0.7889                  | -0.4649 | -2.6204 | H      | 1.13061                  | -0.2168 | -1.8158 |
| C           | -2.2939                  | -0.3911 | -2.5582 | H      | -0.3668                  | -0.8952 | -3.5293 |
| O           | -0.044                   | 1.96006 | -0.4699 | H      | -2.5956                  | 0.38571 | -1.8473 |
| C           | -2.9391                  | -1.7441 | -2.1611 | H      | -2.6885                  | -0.0737 | -3.5326 |
| C           | -4.328                   | -1.5701 | -1.5244 | H      | -2.2863                  | -2.2604 | -1.4528 |
| C           | -4.24                    | -0.8062 | -0.2156 | H      | -3.0278                  | -2.394  | -3.0397 |
| C           | -1.0501                  | 2.8264  | -0.2331 | H      | -4.7606                  | -2.5545 | -1.3003 |
| O           | -2.2065                  | 2.50414 | -0.0371 | H      | -5.0225                  | -1.0526 | -2.1929 |
| C           | -0.5342                  | 4.2431  | -0.2269 | H      | 0.05412                  | 4.38382 | 0.68621 |
| O           | -5.1907                  | 0.12426 | -0.1028 | H      | 0.12633                  | 4.41977 | -1.0806 |
| O           | -3.3997                  | -1.0029 | 0.65147 | H      | -1.3714                  | 4.94223 | -0.2396 |
| C           | -5.126                   | 0.95995 | 1.07612 | H      | -5.157                   | 0.34567 | 1.9789  |
| H           | -0.5832                  | 0.25353 | 4.1803  | H      | -4.2075                  | 1.54995 | 1.05312 |
| H           | -0.6123                  | -2.2266 | 3.26354 | H      | -6.0038                  | 1.60318 | 1.01601 |
| H           | 1.54996                  | 0.15253 | 0.62824 |        |                          |         |         |

| Conformer 2 |                          |         |         |        |                          |         |         |
|-------------|--------------------------|---------|---------|--------|--------------------------|---------|---------|
| Atomic      | Standard Orientation (Å) |         |         | Atomic | Standard Orientation (Å) |         |         |
| Type        | X                        | Y       | Z       | Type   | X                        | Y       | Z       |
| C           | 0.91394                  | 1.91254 | 3.04189 | H      | -0.0374                  | -1.8135 | 3.08879 |
| C           | 0.08211                  | 0.88212 | 3.22862 | H      | 1.53209                  | -1.2351 | 2.53574 |
| C           | -0.1366                  | 0.03064 | 1.99116 | H      | -0.6077                  | -2.5774 | 0.73739 |
| C           | 0.61839                  | 0.83093 | 0.86821 | H      | 1.1578                   | -3.5754 | -0.4141 |
| C           | 1.37834                  | 1.93916 | 1.6391  | H      | 3.10667                  | -2.0713 | 1.46645 |
| O           | 2.23013                  | 2.67769 | 1.17891 | H      | 3.30965                  | -3.7301 | 0.92645 |
| C           | 0.49083                  | -1.3759 | 2.22908 | H      | 3.43349                  | -2.9442 | -1.4601 |
| C           | 0.40067                  | -2.3211 | 1.05869 | H      | 3.25929                  | -1.283  | -0.9136 |
| C           | 1.41766                  | -2.8982 | 0.40231 | H      | 5.38925                  | -1.4856 | 0.40351 |
| C           | 2.89828                  | -2.7515 | 0.63252 | H      | 5.52784                  | -3.1723 | -0.0714 |
| C           | 3.65178                  | -2.2657 | -0.6218 | H      | 7.03964                  | -1.8877 | -1.4408 |
| C           | 5.17038                  | -2.19   | -0.4129 | H      | 5.75426                  | -2.4863 | -2.4756 |
| C           | 5.96907                  | -1.7792 | -1.6612 | H      | 6.34234                  | -0.0971 | -2.9983 |
| C           | 5.70398                  | -0.3478 | -2.1433 | H      | 4.66408                  | -0.2065 | -2.4579 |
| O           | -1.5462                  | -0.0453 | 1.82731 | H      | 5.91                     | 0.38066 | -1.3492 |
| C           | -0.3211                  | 1.41554 | -0.2122 | H      | -1.812                   | -0.8377 | 1.32024 |
| C           | -0.8689                  | 0.3771  | -1.1584 | H      | -1.1117                  | 1.99248 | 0.26247 |
| C           | -2.0882                  | 0.37444 | -1.7112 | H      | -0.1618                  | -0.3974 | -1.4526 |
| C           | -3.2115                  | 1.3489  | -1.4753 | H      | -2.3092                  | -0.4173 | -2.4308 |
| O           | 0.47102                  | 2.32152 | -1.0338 | H      | -2.9425                  | 2.07352 | -0.7006 |
| C           | -4.5549                  | 0.68031 | -1.1173 | H      | -3.3683                  | 1.93361 | -2.3945 |
| C           | -4.5051                  | -0.2172 | 0.13943 | H      | -4.9249                  | 0.09042 | -1.9641 |
| C           | -3.9259                  | -1.5968 | -0.0946 | H      | -5.2939                  | 1.47106 | -0.9435 |
| C           | 0.20546                  | 3.64679 | -0.941  | H      | -5.5286                  | -0.3708 | 0.5053  |
| O           | -0.7114                  | 4.11831 | -0.3021 | H      | -3.9267                  | 0.25494 | 0.93758 |
| C           | 1.22414                  | 4.43772 | -1.7234 | H      | 2.17994                  | 4.38295 | -1.1911 |
| O           | -4.6039                  | -2.2705 | -1.041  | H      | 1.37091                  | 4.00669 | -2.718  |
| O           | -2.9837                  | -2.0909 | 0.50405 | H      | 0.90307                  | 5.47732 | -1.8007 |
| C           | -4.1422                  | -3.6043 | -1.3204 | H      | -4.8053                  | -3.984  | -2.0978 |
| H           | 1.2466                   | 2.63655 | 3.77741 | H      | -3.1075                  | -3.585  | -1.6721 |
| H           | -0.4199                  | 0.61661 | 4.15483 | H      | -4.2034                  | -4.2258 | -0.4236 |
| H           | 1.36307                  | 0.20891 | 0.35869 |        |                          |         |         |



| Conformer 3 |                          |         |         |        |                          |         |         |
|-------------|--------------------------|---------|---------|--------|--------------------------|---------|---------|
| Atomic      | Standard Orientation (Å) |         |         | Atomic | Standard Orientation (Å) |         |         |
| Type        | X                        | Y       | Z       | Type   | X                        | Y       | Z       |
| C           | -1.7484                  | 2.08618 | -1.1377 | H      | -1.9614                  | -0.3392 | 1.38627 |
| C           | -1.6968                  | 0.75066 | -1.1901 | H      | -0.4665                  | -1.2654 | 1.34144 |
| C           | -0.6533                  | 0.13703 | -0.2744 | H      | -1.3936                  | -2.5463 | -0.7111 |
| C           | -0.0486                  | 1.38182 | 0.47279 | H      | -3.5423                  | -3.3692 | -0.271  |
| C           | -0.7605                  | 2.6032  | -0.1681 | H      | -4.2557                  | -2.7215 | 2.14698 |
| O           | -0.573                   | 3.77597 | 0.09948 | H      | -3.9075                  | -1.0516 | 1.74685 |
| C           | -1.285                   | -0.8778 | 0.71455 | H      | -5.9494                  | -2.8722 | 0.35106 |
| C           | -1.9842                  | -2.0328 | 0.04564 | H      | -6.3389                  | -1.655  | 1.556   |
| C           | -3.2135                  | -2.4992 | 0.30186 | H      | -5.1192                  | -1.0652 | -1.1995 |
| C           | -4.2197                  | -2.0066 | 1.31008 | H      | -6.8288                  | -0.9589 | -0.8088 |
| C           | -5.647                   | -1.8872 | 0.73429 | H      | -6.3037                  | 0.81358 | 0.91745 |
| C           | -5.8216                  | -0.8456 | -0.3826 | H      | -4.6158                  | 0.76725 | 0.42874 |
| C           | -5.6396                  | 0.61159 | 0.06439 | H      | -5.7895                  | 2.64939 | -0.712  |
| C           | -5.9277                  | 1.6177  | -1.0548 | H      | -5.2602                  | 1.45905 | -1.911  |
| O           | 0.28042                  | -0.5065 | -1.139  | H      | -6.9581                  | 1.52188 | -1.4193 |
| C           | 1.48888                  | 1.47008 | 0.42717 | H      | 0.65356                  | -1.299  | -0.6998 |
| C           | 2.17925                  | 0.38258 | 1.21249 | H      | 1.82724                  | 1.49615 | -0.606  |
| C           | 3.33832                  | -0.2112 | 0.9006  | H      | 1.70625                  | 0.12631 | 2.16098 |
| C           | 4.19611                  | 0.01805 | -0.3155 | H      | 3.73446                  | -0.9387 | 1.61286 |
| O           | 1.85689                  | 2.72888 | 1.06103 | H      | 3.72242                  | 0.7277  | -1.0001 |
| C           | 4.57328                  | -1.2717 | -1.0724 | H      | 5.13341                  | 0.49538 | 0.00827 |
| C           | 3.3661                   | -2.0843 | -1.5918 | H      | 5.19417                  | -1.918  | -0.4409 |
| C           | 2.68008                  | -2.9323 | -0.5412 | H      | 5.19117                  | -0.9925 | -1.9336 |
| C           | 2.51405                  | 3.64166 | 0.30653 | H      | 3.71322                  | -2.7758 | -2.3701 |
| O           | 2.93057                  | 3.43355 | -0.8135 | H      | 2.61348                  | -1.4273 | -2.0358 |
| C           | 2.62735                  | 4.9475  | 1.05259 | H      | 1.63013                  | 5.39811 | 1.09975 |
| O           | 3.52442                  | -3.8163 | 0.0173  | H      | 2.96729                  | 4.78107 | 2.07897 |
| O           | 1.50068                  | -2.8758 | -0.2291 | H      | 3.31147                  | 5.61493 | 0.52694 |
| C           | 2.96011                  | -4.6829 | 1.01867 | H      | 2.1596                   | -5.2909 | 0.59    |
| H           | -2.395                   | 2.74499 | -1.7068 | H      | 3.78396                  | -5.3124 | 1.3549  |
| H           | -2.2936                  | 0.10802 | -1.8293 | H      | 2.5579                   | -4.0966 | 1.84861 |
| H           | -0.3462                  | 1.37449 | 1.53058 |        |                          |         |         |

| Conformer 4 |                          |         |         |        |                          |         |         |
|-------------|--------------------------|---------|---------|--------|--------------------------|---------|---------|
| Atomic      | Standard Orientation (Å) |         |         | Atomic | Standard Orientation (Å) |         |         |
| Type        | X                        | Y       | Z       | Type   | X                        | Y       | Z       |
| C           | 2.04008                  | -3.4825 | -0.4917 | H      | -0.493                   | -1.1765 | 2.13009 |
| C           | 2.07755                  | -3.033  | 0.76917 | H      | 0.44596                  | -2.4537 | 2.89401 |
| C           | 1.22764                  | -1.8021 | 1.0052  | H      | -0.5188                  | -4.1549 | 1.26879 |
| C           | 0.7731                   | -1.3995 | -0.4395 | H      | -2.7954                  | -3.8886 | 0.81942 |
| C           | 1.20493                  | -2.5903 | -1.325  | H      | -3.8499                  | -1.9315 | 2.08229 |
| O           | 0.89989                  | -2.7584 | -2.4919 | H      | -2.4925                  | -0.9125 | 1.62726 |
| C           | 0.01711                  | -2.1251 | 1.9363  | H      | -3.0803                  | -1.225  | -0.8004 |
| C           | -0.9447                  | -3.1645 | 1.42909 | H      | -4.4099                  | -2.2777 | -0.3473 |
| C           | -2.2507                  | -3.01   | 1.17067 | H      | -5.4834                  | -0.3825 | 0.9182  |
| C           | -3.0932                  | -1.7684 | 1.29839 | H      | -4.1581                  | 0.67493 | 0.45805 |
| C           | -3.8228                  | -1.4106 | -0.0113 | H      | -4.7444                  | 0.35201 | -1.9682 |
| C           | -4.7461                  | -0.1935 | 0.12357 | H      | -6.0697                  | -0.7027 | -1.5069 |
| C           | -5.4813                  | 0.16421 | -1.1745 | H      | -6.9114                  | 1.60968 | -1.9754 |
| C           | -6.4015                  | 1.38102 | -1.0327 | H      | -7.1717                  | 1.20927 | -0.2706 |
| O           | 2.05463                  | -0.8463 | 1.65905 | H      | -5.8368                  | 2.27342 | -0.7349 |
| C           | 1.35495                  | -0.067  | -0.9484 | H      | 1.49253                  | -0.0897 | 1.91375 |
| C           | 0.65562                  | 0.41128 | -2.1964 | H      | 1.29105                  | 0.67624 | -0.1613 |
| C           | 0.2908                   | 1.67614 | -2.4477 | H      | 0.41673                  | -0.3654 | -2.9189 |
| C           | 0.57712                  | 2.91473 | -1.6338 | H      | -0.2575                  | 1.85514 | -3.3747 |
| O           | 2.7775                   | -0.2855 | -1.2078 | H      | 1.39304                  | 2.73728 | -0.9267 |
| C           | -0.6414                  | 3.50787 | -0.8905 | H      | 0.94342                  | 3.68531 | -2.3265 |
| C           | -1.137                   | 2.66032 | 0.29574 | H      | -1.4786                  | 3.63823 | -1.5883 |
| C           | -0.0903                  | 2.40704 | 1.36419 | H      | -0.3751                  | 4.50507 | -0.5245 |
| C           | 3.65544                  | 0.58033 | -0.6643 | H      | -1.4923                  | 1.68059 | -0.0352 |
| O           | 3.35471                  | 1.59926 | -0.0727 | H      | -1.9842                  | 3.16879 | 0.77611 |
| C           | 5.07152                  | 0.10193 | -0.8794 | H      | 5.25966                  | -0.7525 | -0.2196 |
| O           | 0.60847                  | 3.50561 | 1.66963 | H      | 5.21398                  | -0.2368 | -1.9094 |
| O           | 0.10007                  | 1.32318 | 1.89672 | H      | 5.77071                  | 0.90423 | -0.6402 |
| C           | 1.70688                  | 3.33003 | 2.59129 | H      | 2.4701                   | 2.69854 | 2.13058 |
| H           | 2.52615                  | -4.3655 | -0.8921 | H      | 2.09388                  | 4.33329 | 2.7687  |
| H           | 2.62288                  | -3.4828 | 1.59491 | H      | 1.35504                  | 2.88065 | 3.52265 |
| H           | -0.3173                  | -1.3172 | -0.4987 |        |                          |         |         |

| Conformer 5 |                          |         |         |        |                          |         |         |
|-------------|--------------------------|---------|---------|--------|--------------------------|---------|---------|
| Atomic      | Standard Orientation (Å) |         |         | Atomic | Standard Orientation (Å) |         |         |
| Type        | X                        | Y       | Z       | Type   | X                        | Y       | Z       |
| C           | -0.5913                  | 2.46769 | -2.4332 | H      | 1.48808                  | 2.10501 | 1.45098 |
| C           | -0.3889                  | 3.12192 | -1.283  | H      | 0.95532                  | 3.73345 | 1.06818 |
| C           | 0.05409                  | 2.22433 | -0.1384 | H      | 2.36535                  | 3.74417 | -1.0383 |
| C           | 0.32222                  | 0.85302 | -0.8462 | H      | 4.46599                  | 2.74463 | -0.846  |
| C           | -0.2719                  | 1.0315  | -2.2665 | H      | 5.07592                  | 1.76636 | 1.36445 |
| O           | -0.4369                  | 0.1656  | -3.1067 | H      | 3.41809                  | 1.27019 | 1.6642  |
| C           | 1.28151                  | 2.78437 | 0.61936 | H      | 3.53657                  | -0.3251 | -0.2595 |
| C           | 2.4979                   | 3.01751 | -0.2357 | H      | 5.17562                  | 0.19029 | -0.6138 |
| C           | 3.70483                  | 2.446   | -0.1228 | H      | 5.96724                  | -0.6252 | 1.58979 |
| C           | 4.16025                  | 1.40875 | 0.86939 | H      | 4.3349                   | -1.0823 | 2.05104 |
| C           | 4.45749                  | 0.04761 | 0.20681 | H      | 5.83436                  | -2.2916 | -0.3374 |
| C           | 5.0126                   | -0.9939 | 1.18817 | H      | 5.82089                  | -2.9934 | 1.27131 |
| C           | 5.22652                  | -2.3881 | 0.57376 | H      | 4.14285                  | -4.1258 | -0.1776 |
| C           | 3.92858                  | -3.1398 | 0.25093 | H      | 3.33047                  | -3.295  | 1.15762 |
| O           | -0.9849                  | 2.202   | 0.83897 | H      | 3.29989                  | -2.5978 | -0.4644 |
| C           | -0.1778                  | -0.411  | -0.1236 | H      | -1.8184                  | 1.86411 | 0.45068 |
| C           | 0.39068                  | -0.6243 | 1.25453 | H      | -1.2644                  | -0.4238 | -0.1081 |
| C           | -0.3086                  | -0.9936 | 2.33502 | H      | 1.4693                   | -0.4992 | 1.34097 |
| C           | -1.7997                  | -1.2184 | 2.39476 | H      | 0.23633                  | -1.1199 | 3.27118 |
| O           | 0.2645                   | -1.5351 | -0.9501 | H      | -2.1599                  | -1.5314 | 1.40891 |
| C           | -2.5774                  | 0.03824 | 2.86663 | H      | -2.0164                  | -2.0558 | 3.07096 |
| C           | -4.0311                  | 0.05808 | 2.36187 | H      | -2.0647                  | 0.93381 | 2.50796 |
| C           | -4.0883                  | 0.13315 | 0.8465  | H      | -2.5816                  | 0.09205 | 3.9618  |
| C           | -0.6833                  | -2.3551 | -1.4505 | H      | -4.5451                  | 0.94627 | 2.75307 |
| O           | -1.8594                  | -2.3187 | -1.1451 | H      | -4.5915                  | -0.8202 | 2.69586 |
| C           | -0.0824                  | -3.306  | -2.4547 | H      | 0.12893                  | -2.7399 | -3.3685 |
| O           | -4.9455                  | -0.7484 | 0.32546 | H      | 0.86191                  | -3.7179 | -2.088  |
| O           | -3.43                    | 0.90207 | 0.15925 | H      | -0.7895                  | -4.107  | -2.6748 |
| C           | -4.9952                  | -0.8117 | -1.1185 | H      | -5.7957                  | -1.5162 | -1.3442 |
| H           | -0.964                   | 2.87054 | -3.3687 | H      | -5.2165                  | 0.17358 | -1.535  |
| H           | -0.5742                  | 4.17821 | -1.1048 | H      | -4.0385                  | -1.1756 | -1.4987 |
| H           | 1.40576                  | 0.74762 | -0.9928 |        |                          |         |         |

| Conformer 6 |                          |         |         |        |                          |         |         |
|-------------|--------------------------|---------|---------|--------|--------------------------|---------|---------|
| Atomic      | Standard Orientation (Å) |         |         | Atomic | Standard Orientation (Å) |         |         |
| Type        | X                        | Y       | Z       | Type   | X                        | Y       | Z       |
| C           | 1.06973                  | -3.8961 | 0.1948  | H      | -0.0623                  | -1.9381 | 3.27401 |
| C           | 1.3071                   | -3.1948 | 1.31043 | H      | -1.1567                  | -2.5524 | 2.03481 |
| C           | 0.73363                  | -1.7902 | 1.28487 | H      | -0.5888                  | 0.45568 | 2.5299  |
| C           | 0.26858                  | -1.6291 | -0.2036 | H      | -2.851                   | 0.83241 | 2.14908 |
| C           | 0.3653                   | -3.053  | -0.7951 | H      | -3.192                   | -2.2263 | 1.82978 |
| O           | -0.0687                  | -3.4028 | -1.8776 | H      | -4.3796                  | -1.1203 | 2.49831 |
| C           | -0.473                   | -1.7317 | 2.27506 | H      | -3.4289                  | -1.136  | -0.418  |
| C           | -1.2005                  | -0.4136 | 2.29648 | H      | -4.9148                  | -1.8581 | 0.18301 |
| C           | -2.506                   | -0.1993 | 2.07312 | H      | -5.7043                  | 0.4251  | 0.9283  |
| C           | -3.5795                  | -1.2051 | 1.74654 | H      | -4.251                   | 1.13789 | 0.24103 |
| C           | -4.2113                  | -1.0295 | 0.34644 | H      | -4.8882                  | 0.25843 | -2.0248 |
| C           | -4.9515                  | 0.29783 | 0.13522 | H      | -6.3461                  | -0.4419 | -1.3416 |
| C           | -5.639                   | 0.39279 | -1.2334 | H      | -6.8568                  | 1.75417 | -2.4331 |
| C           | -6.3769                  | 1.71813 | -1.4484 | H      | -7.1578                  | 1.86493 | -0.6919 |
| O           | 1.77452                  | -0.9157 | 1.69632 | H      | -5.6893                  | 2.57048 | -1.382  |
| C           | 1.09947                  | -0.6215 | -1.0208 | H      | 1.45493                  | 0.00562 | 1.73085 |
| C           | 0.44148                  | -0.2424 | -2.3209 | H      | 1.29076                  | 0.26003 | -0.4158 |
| C           | 0.21029                  | 1.02077 | -2.7028 | H      | 0.11714                  | -1.0728 | -2.9436 |
| C           | 0.61009                  | 2.26056 | -1.9346 | H      | -0.3143                  | 1.17684 | -3.6456 |
| O           | 2.39419                  | -1.2531 | -1.2773 | H      | 1.58926                  | 2.09057 | -1.4732 |
| C           | -0.4073                  | 2.68047 | -0.8469 | H      | 0.74524                  | 3.09511 | -2.6345 |
| C           | 0.19634                  | 3.66768 | 0.17083 | H      | -0.7571                  | 1.79763 | -0.3012 |
| C           | 1.28322                  | 2.99354 | 0.98718 | H      | -1.2915                  | 3.13492 | -1.3097 |
| C           | 3.50347                  | -0.5125 | -1.0983 | H      | -0.5819                  | 3.99741 | 0.87073 |
| O           | 3.51048                  | 0.67372 | -0.8313 | H      | 0.60544                  | 4.55509 | -0.3206 |
| C           | 4.74087                  | -1.3631 | -1.2618 | H      | 4.81624                  | -2.0527 | -0.4137 |
| O           | 2.44216                  | 3.65601 | 0.9509  | H      | 4.67549                  | -1.9659 | -2.1722 |
| O           | 1.12215                  | 1.95124 | 1.60492 | H      | 5.62427                  | -0.7241 | -1.2916 |
| C           | 3.55478                  | 3.03233 | 1.63137 | H      | 4.36832                  | 3.75489 | 1.56718 |
| H           | 1.32962                  | -4.9307 | -0.0012 | H      | 3.29739                  | 2.83061 | 2.67372 |
| H           | 1.82002                  | -3.5542 | 2.19859 | H      | 3.81756                  | 2.10414 | 1.1202  |
| H           | -0.7732                  | -1.2961 | -0.257  |        |                          |         |         |

| Conformer 7 |                          |         |         |        |                          |         |         |
|-------------|--------------------------|---------|---------|--------|--------------------------|---------|---------|
| Atomic      | Standard Orientation (Å) |         |         | Atomic | Standard Orientation (Å) |         |         |
| Type        | X                        | Y       | Z       | Type   | X                        | Y       | Z       |
| C           | 1.06973                  | -3.8961 | 0.1948  | H      | -0.0623                  | -1.9381 | 3.27401 |
| C           | 1.3071                   | -3.1948 | 1.31043 | H      | -1.1567                  | -2.5524 | 2.03481 |
| C           | 0.73363                  | -1.7902 | 1.28487 | H      | -0.5888                  | 0.45568 | 2.5299  |
| C           | 0.26858                  | -1.6291 | -0.2036 | H      | -2.851                   | 0.83241 | 2.14908 |
| C           | 0.3653                   | -3.053  | -0.7951 | H      | -3.192                   | -2.2263 | 1.82978 |
| O           | -0.0687                  | -3.4028 | -1.8776 | H      | -4.3796                  | -1.1203 | 2.49831 |
| C           | -0.473                   | -1.7317 | 2.27506 | H      | -3.4289                  | -1.136  | -0.418  |
| C           | -1.2005                  | -0.4136 | 2.29648 | H      | -4.9148                  | -1.8581 | 0.18301 |
| C           | -2.506                   | -0.1993 | 2.07312 | H      | -5.7043                  | 0.4251  | 0.9283  |
| C           | -3.5795                  | -1.2051 | 1.74654 | H      | -4.251                   | 1.13789 | 0.24103 |
| C           | -4.2113                  | -1.0295 | 0.34644 | H      | -4.8882                  | 0.25843 | -2.0248 |
| C           | -4.9515                  | 0.29783 | 0.13522 | H      | -6.3461                  | -0.4419 | -1.3416 |
| C           | -5.639                   | 0.39279 | -1.2334 | H      | -6.8568                  | 1.75417 | -2.4331 |
| C           | -6.3769                  | 1.71813 | -1.4484 | H      | -7.1578                  | 1.86493 | -0.6919 |
| O           | 1.77452                  | -0.9157 | 1.69632 | H      | -5.6893                  | 2.57048 | -1.382  |
| C           | 1.09947                  | -0.6215 | -1.0208 | H      | 1.45493                  | 0.00562 | 1.73085 |
| C           | 0.44148                  | -0.2424 | -2.3209 | H      | 1.29076                  | 0.26003 | -0.4158 |
| C           | 0.21029                  | 1.02077 | -2.7028 | H      | 0.11714                  | -1.0728 | -2.9436 |
| C           | 0.61009                  | 2.26056 | -1.9346 | H      | -0.3143                  | 1.17684 | -3.6456 |
| O           | 2.39419                  | -1.2531 | -1.2773 | H      | 1.58926                  | 2.09057 | -1.4732 |
| C           | -0.4073                  | 2.68047 | -0.8469 | H      | 0.74524                  | 3.09511 | -2.6345 |
| C           | 0.19634                  | 3.66768 | 0.17083 | H      | -0.7571                  | 1.79763 | -0.3012 |
| C           | 1.28322                  | 2.99354 | 0.98718 | H      | -1.2915                  | 3.13492 | -1.3097 |
| C           | 3.50347                  | -0.5125 | -1.0983 | H      | -0.5819                  | 3.99741 | 0.87073 |
| O           | 3.51048                  | 0.67372 | -0.8313 | H      | 0.60544                  | 4.55509 | -0.3206 |
| C           | 4.74087                  | -1.3631 | -1.2618 | H      | 4.81624                  | -2.0527 | -0.4137 |
| O           | 2.44216                  | 3.65601 | 0.9509  | H      | 4.67549                  | -1.9659 | -2.1722 |
| O           | 1.12215                  | 1.95124 | 1.60492 | H      | 5.62427                  | -0.7241 | -1.2916 |
| C           | 3.55478                  | 3.03233 | 1.63137 | H      | 4.36832                  | 3.75489 | 1.56718 |
| H           | 1.32962                  | -4.9307 | -0.0012 | H      | 3.29739                  | 2.83061 | 2.67372 |
| H           | 1.82002                  | -3.5542 | 2.19859 | H      | 3.81756                  | 2.10414 | 1.1202  |
| H           | -0.7732                  | -1.2961 | -0.257  |        |                          |         |         |

| Conformer 8 |                          |         |         |        |                          |         |         |
|-------------|--------------------------|---------|---------|--------|--------------------------|---------|---------|
| Atomic      | Standard Orientation (Å) |         |         | Atomic | Standard Orientation (Å) |         |         |
| Type        | X                        | Y       | Z       | Type   | X                        | Y       | Z       |
| C           | 0.47283                  | -2.0409 | 2.6413  | H      | -2.0581                  | 0.68219 | 0.2691  |
| C           | -0.2511                  | -0.9201 | 2.74681 | H      | -2.3085                  | 0.73197 | 2.00395 |
| C           | -0.4857                  | -0.21   | 1.42424 | H      | -2.8206                  | -1.7881 | 1.99091 |
| C           | 0.14771                  | -1.1888 | 0.37223 | H      | -4.2755                  | -2.4162 | 0.27645 |
| C           | 0.81928                  | -2.2946 | 1.22519 | H      | -3.3653                  | 0.10363 | -1.2779 |
| O           | 1.49339                  | -3.2225 | 0.81555 | H      | -3.6946                  | -1.4672 | -1.9977 |
| C           | -1.9869                  | 0.07973 | 1.17898 | H      | -5.6177                  | -0.0676 | -2.3825 |
| C           | -2.8708                  | -1.1361 | 1.11786 | H      | -6.083                   | -1.3272 | -1.2489 |
| C           | -3.7022                  | -1.4981 | 0.13109 | H      | -5.7993                  | 0.30107 | 0.65878 |
| C           | -3.981                   | -0.7975 | -1.1729 | H      | -5.3534                  | 1.55558 | -0.4868 |
| C           | -5.4678                  | -0.4211 | -1.353  | H      | -7.6067                  | 1.34964 | -1.59   |
| C           | -5.9639                  | 0.64711 | -0.3711 | H      | -8.0532                  | 0.09797 | -0.442  |
| C           | -7.4436                  | 1.00553 | -0.5585 | H      | -8.9928                  | 2.31063 | 0.26268 |
| C           | -7.9334                  | 2.07767 | 0.42032 | H      | -7.8157                  | 1.74827 | 1.46005 |
| O           | 0.11316                  | 1.08164 | 1.48444 | H      | -7.3665                  | 3.00959 | 0.30365 |
| C           | 1.09986                  | -0.5549 | -0.6608 | H      | 1.06491                  | 1.00403 | 1.71276 |
| C           | 0.45402                  | 0.51605 | -1.5053 | H      | 1.99593                  | -0.1835 | -0.1694 |
| C           | 1.0826                   | 1.54616 | -2.0842 | H      | -0.6163                  | 0.40394 | -1.6717 |
| C           | 2.5528                   | 1.87684 | -2.0455 | H      | 0.47271                  | 2.23649 | -2.6701 |
| O           | 1.51124                  | -1.642  | -1.5468 | H      | 3.13569                  | 1.04442 | -1.6382 |
| C           | 2.88702                  | 3.17382 | -1.2759 | H      | 2.89728                  | 2.00783 | -3.0815 |
| C           | 2.61511                  | 3.08911 | 0.23749 | H      | 2.29897                  | 4.0078  | -1.6807 |
| C           | 3.39214                  | 1.99264 | 0.93923 | H      | 3.94181                  | 3.41882 | -1.4395 |
| C           | 2.81805                  | -1.9802 | -1.5652 | H      | 1.55567                  | 2.91124 | 0.43802 |
| O           | 3.70565                  | -1.3419 | -1.033  | H      | 2.88996                  | 4.0421  | 0.70935 |
| C           | 3.01819                  | -3.2671 | -2.3247 | H      | 4.07668                  | -3.4033 | -2.5506 |
| O           | 4.68972                  | 1.99243 | 0.6177  | H      | 2.66846                  | -4.0874 | -1.6885 |
| O           | 2.90944                  | 1.18316 | 1.72029 | H      | 2.42417                  | -3.2762 | -3.2427 |
| C           | 5.47408                  | 0.89941 | 1.14743 | H      | 6.49279                  | 1.09113 | 0.81057 |
| H           | 0.80305                  | -2.6947 | 3.44114 | H      | 5.42228                  | 0.88826 | 2.23839 |
| H           | -0.6218                  | -0.4801 | 3.66931 | H      | 5.10165                  | -0.0449 | 0.74447 |
| H           | -0.6568                  | -1.6843 | -0.1874 |        |                          |         |         |

| Conformer 9 |                          |         |         |             |                          |         |         |
|-------------|--------------------------|---------|---------|-------------|--------------------------|---------|---------|
| Atomic Type | Standard Orientation (Å) |         |         | Atomic Type | Standard Orientation (Å) |         |         |
|             | X                        | Y       | Z       |             | X                        | Y       | Z       |
| C           | 1.38722                  | 2.26044 | 1.36086 | H           | 1.7097                   | -0.124  | -1.2652 |
| C           | 1.4393                   | 0.92473 | 1.3241  | H           | 0.23436                  | -1.0843 | -1.23   |
| C           | 0.40288                  | 0.29521 | 0.40915 | H           | 1.15781                  | -2.4564 | 0.69872 |
| C           | -0.248                   | 1.53653 | -0.2995 | H           | 3.40874                  | -3.0573 | 0.44671 |
| C           | 0.32175                  | 2.76    | 0.46544 | H           | 4.50687                  | -2.2284 | -1.6721 |
| O           | -0.0199                  | 3.92183 | 0.34325 | H           | 3.70831                  | -0.6727 | -1.5085 |
| C           | 1.04744                  | -0.6898 | -0.602  | H           | 4.93228                  | -0.2689 | 0.64023 |
| C           | 1.77316                  | -1.8407 | 0.04531 | H           | 5.71049                  | -1.8388 | 0.50754 |
| C           | 3.06019                  | -2.1811 | -0.1039 | H           | 6.75126                  | -1.1329 | -1.678  |
| C           | 4.12254                  | -1.5085 | -0.9325 | H           | 6.03408                  | 0.46141 | -1.5005 |
| C           | 5.30681                  | -1.0036 | -0.084  | H           | 8.06092                  | -0.7894 | 0.43658 |
| C           | 6.43134                  | -0.3923 | -0.9309 | H           | 8.45066                  | 0.35492 | -0.8362 |
| C           | 7.66168                  | 0.06459 | -0.1294 | H           | 8.32251                  | 1.54738 | 1.32768 |
| C           | 7.39899                  | 1.23337 | 0.82796 | H           | 7.00084                  | 2.10244 | 0.28912 |
| O           | -0.501                   | -0.3825 | 1.28077 | H           | 6.6775                   | 0.96899 | 1.60911 |
| C           | -1.7839                  | 1.52349 | -0.3862 | H           | -0.895                   | -1.1523 | 0.82466 |
| C           | -2.3313                  | 0.37384 | -1.19   | H           | -2.2173                  | 1.55383 | 0.61119 |
| C           | -3.3771                  | -0.3959 | -0.8648 | H           | -1.8329                  | 0.20251 | -2.1447 |
| C           | -4.2367                  | -0.2993 | 0.37296 | H           | -3.6537                  | -1.1776 | -1.5747 |
| O           | -2.1521                  | 2.74881 | -1.0851 | H           | -4.2168                  | 0.72248 | 0.76487 |
| C           | -3.8593                  | -1.2678 | 1.51716 | H           | -5.2779                  | -0.4978 | 0.08031 |
| C           | -3.9238                  | -2.7599 | 1.15853 | H           | -4.5575                  | -1.0948 | 2.34487 |
| C           | -2.7645                  | -3.2743 | 0.32892 | H           | -2.8621                  | -1.0211 | 1.89329 |
| C           | -3.0622                  | 3.55638 | -0.4946 | H           | -4.8593                  | -3.0147 | 0.64848 |
| O           | -3.6981                  | 3.26606 | 0.49718 | H           | -3.91                    | -3.3582 | 2.08124 |
| C           | -3.1476                  | 4.87039 | -1.2304 | H           | -2.2205                  | 5.42404 | -1.0461 |
| O           | -3.1236                  | -4.3378 | -0.4104 | H           | -3.2292                  | 4.70717 | -2.3091 |
| O           | -1.6244                  | -2.8416 | 0.33846 | H           | -4.0008                  | 5.44352 | -0.8656 |
| C           | -2.0744                  | -4.9545 | -1.1801 | H           | -2.5481                  | -5.7865 | -1.7008 |
| H           | 1.99415                  | 2.92868 | 1.96204 | H           | -1.6546                  | -4.2412 | -1.8937 |
| H           | 2.1022                   | 0.28936 | 1.90256 | H           | -1.278                   | -5.3129 | -0.5231 |
| H           | 0.13594                  | 1.6177  | -1.3267 |             |                          |         |         |

| Conformer 10 |                          |         |         |        |                          |         |         |
|--------------|--------------------------|---------|---------|--------|--------------------------|---------|---------|
| Atomic       | Standard Orientation (Å) |         |         | Atomic | Standard Orientation (Å) |         |         |
| Type         | X                        | Y       | Z       | Type   | X                        | Y       | Z       |
| C            | 0.66841                  | 4.3221  | 0.04909 | H      | -1.205                   | 1.98758 | -2.5488 |
| C            | 0.30068                  | 3.73422 | -1.0952 | H      | -1.8826                  | 2.12444 | -0.9238 |
| C            | 0.28502                  | 2.21638 | -1.0313 | H      | -0.3927                  | -0.3861 | -1.9844 |
| C            | 0.57356                  | 1.92993 | 0.48276 | H      | -1.9725                  | -1.6722 | -0.8822 |
| C            | 0.95726                  | 3.30139 | 1.08096 | H      | -3.2269                  | -0.5377 | 0.99175 |
| O            | 1.38629                  | 3.50251 | 2.20117 | H      | -3.3119                  | 0.95823 | 0.07198 |
| C            | -1.0822                  | 1.65593 | -1.5075 | H      | -4.7013                  | -0.1957 | -1.6726 |
| C            | -1.1707                  | 0.15403 | -1.4445 | H      | -4.5898                  | -1.7017 | -0.7755 |
| C            | -2.089                   | -0.5901 | -0.8121 | H      | -5.7595                  | -0.6296 | 1.17917 |
| C            | -3.2917                  | -0.1334 | -0.0304 | H      | -5.8757                  | 0.87838 | 0.28452 |
| C            | -4.6177                  | -0.6087 | -0.6579 | H      | -7.265                   | -0.2698 | -1.4701 |
| C            | -5.8512                  | -0.2151 | 0.16393 | H      | -7.15                    | -1.7765 | -0.5755 |
| C            | -7.1739                  | -0.684  | -0.456  | H      | -9.3294                  | -0.6364 | -0.0988 |
| C            | -8.4021                  | -0.2875 | 0.36974 | H      | -8.357                   | -0.7161 | 1.37858 |
| O            | 1.32018                  | 1.80661 | -1.925  | H      | -8.4728                  | 0.80201 | 0.47722 |
| C            | 1.55271                  | 0.78953 | 0.8152  | H      | 1.48437                  | 0.85096 | -1.832  |
| C            | 1.57557                  | 0.41143 | 2.27501 | H      | 1.31748                  | -0.0775 | 0.1976  |
| C            | 0.9994                   | -0.6683 | 2.81749 | H      | 2.10601                  | 1.11571 | 2.90936 |
| C            | 0.16855                  | -1.726  | 2.13811 | H      | 1.12475                  | -0.8037 | 3.8935  |
| O            | 2.91409                  | 1.21724 | 0.48935 | H      | -0.7867                  | -1.8031 | 2.6781  |
| C            | 0.82228                  | -3.1258 | 2.14037 | H      | -0.0815                  | -1.4505 | 1.11156 |
| C            | 2.08963                  | -3.2385 | 1.28527 | H      | 0.08457                  | -3.8565 | 1.78865 |
| C            | 1.83734                  | -3.1887 | -0.2112 | H      | 1.07765                  | -3.4051 | 3.17117 |
| C            | 3.56803                  | 0.59425 | -0.5028 | H      | 2.62767                  | -4.169  | 1.50115 |
| O            | 3.09275                  | -0.2962 | -1.1884 | H      | 2.79124                  | -2.4278 | 1.52439 |
| C            | 4.95013                  | 1.1669  | -0.6887 | H      | 4.86396                  | 2.10112 | -1.2558 |
| O            | 2.94863                  | -3.5348 | -0.8889 | H      | 5.41301                  | 1.39979 | 0.27324 |
| O            | 0.79002                  | -2.8843 | -0.7485 | H      | 5.5639                   | 0.46483 | -1.2548 |
| C            | 2.86855                  | -3.4283 | -2.3213 | H      | 2.00998                  | -3.9873 | -2.7015 |
| H            | 0.77818                  | 5.38452 | 0.23742 | H      | 2.78528                  | -2.378  | -2.6071 |
| H            | 0.05779                  | 4.24102 | -2.0253 | H      | 3.8003                   | -3.8539 | -2.6961 |
| H            | -0.3735                  | 1.64789 | 0.9615  |        |                          |         |         |



| Conformer 11 |                          |         |         |        |                          |         |         |
|--------------|--------------------------|---------|---------|--------|--------------------------|---------|---------|
| Atomic       | Standard Orientation (Å) |         |         | Atomic | Standard Orientation (Å) |         |         |
| Type         | X                        | Y       | Z       | Type   | X                        | Y       | Z       |
| C            | 1.00313                  | 1.44384 | 1.42443 | H      | 2.31412                  | 0.17301 | -1.6542 |
| C            | 1.41723                  | 0.23939 | 1.01189 | H      | 1.11992                  | -1.0041 | -2.2048 |
| C            | 0.72446                  | -0.2463 | -0.2498 | H      | 2.06953                  | -2.6942 | -0.5156 |
| C            | -0.1211                  | 0.99926 | -0.6982 | H      | 4.4095                   | -2.8463 | -0.677  |
| C            | -0.0034                  | 1.99141 | 0.48978 | H      | 5.32136                  | -1.275  | -2.5048 |
| O            | -0.6023                  | 3.0429  | 0.62663 | H      | 4.40498                  | 0.04255 | -1.7935 |
| C            | 1.72434                  | -0.6942 | -1.3401 | H      | 6.6127                   | -1.561  | -0.3814 |
| C            | 2.60796                  | -1.8395 | -0.9202 | H      | 6.82159                  | 0.01281 | -1.1351 |
| C            | 3.94198                  | -1.9183 | -1.0142 | H      | 5.18549                  | 1.01246 | 0.49045 |
| C            | 4.91273                  | -0.8995 | -1.5538 | H      | 4.92917                  | -0.5709 | 1.20644 |
| C            | 6.0954                   | -0.6155 | -0.604  | H      | 6.42373                  | 0.65536 | 2.64688 |
| C            | 5.68359                  | 0.05631 | 0.71277 | H      | 7.33934                  | -0.6503 | 1.91379 |
| C            | 6.84172                  | 0.30517 | 1.69334 | H      | 8.64917                  | 1.49543 | 1.9701  |
| C            | 7.88216                  | 1.32138 | 1.20669 | H      | 8.3944                   | 0.98161 | 0.29955 |
| O            | -0.0445                  | -1.4052 | 0.06345 | H      | 7.41333                  | 2.28748 | 0.98059 |
| C            | -1.5725                  | 0.71396 | -1.1286 | H      | -0.6805                  | -1.2225 | 0.78552 |
| C            | -1.7029                  | -0.1841 | -2.3309 | H      | -2.1402                  | 0.3317  | -0.2843 |
| C            | -2.5758                  | -1.1914 | -2.4559 | H      | -1.0461                  | 0.05528 | -3.1671 |
| C            | -3.5586                  | -1.6496 | -1.4063 | H      | -2.5665                  | -1.7566 | -3.3885 |
| O            | -2.1443                  | 2.00737 | -1.4972 | H      | -3.8212                  | -0.8053 | -0.7598 |
| C            | -3.0164                  | -2.8215 | -0.5474 | H      | -4.4947                  | -1.9566 | -1.8911 |
| C            | -3.6852                  | -2.8997 | 0.83641 | H      | -1.9387                  | -2.7008 | -0.4152 |
| C            | -3.3841                  | -1.6665 | 1.66958 | H      | -3.168                   | -3.7742 | -1.0685 |
| C            | -3.2075                  | 2.4474  | -0.7931 | H      | -3.2954                  | -3.7673 | 1.38546 |
| O            | -3.8142                  | 1.78615 | 0.02733 | H      | -4.7699                  | -3.0202 | 0.75928 |
| C            | -3.5222                  | 3.87741 | -1.1525 | H      | -2.7573                  | 4.51428 | -0.695  |
| O            | -4.4775                  | -1.1679 | 2.25233 | H      | -3.4798                  | 4.02659 | -2.235  |
| O            | -2.2757                  | -1.1669 | 1.80567 | H      | -4.5058                  | 4.14867 | -0.7666 |
| C            | -4.2993                  | 0.05991 | 2.99538 | H      | -5.2695                  | 0.25937 | 3.45038 |
| H            | 1.31213                  | 1.98024 | 2.31507 | H      | -3.5307                  | -0.0673 | 3.761   |
| H            | 2.13798                  | -0.3993 | 1.51302 | H      | -4.019                   | 0.86152 | 2.30909 |
| H            | 0.37952                  | 1.48666 | -1.5468 |        |                          |         |         |

Table S10. Energy analyses of 7*S*,8*R*,12*S*-2/7*R*,8*S*,12*R*-2 (five conformers)

| NO. | 3D conformers<br>B3LYP/6-31G(d,p)                                                   | G (Hartree)  | Boltzmann<br>distribution | Calculated ECD spectrum<br>7 <i>S</i> ,8 <i>R</i> ,12 <i>S</i> -2                    |
|-----|-------------------------------------------------------------------------------------|--------------|---------------------------|--------------------------------------------------------------------------------------|
|     |                                                                                     |              |                           |                                                                                      |
| 1   | 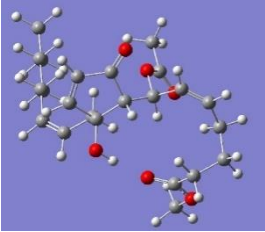   | -1347.771487 | 80.14 %                   |    |
| 2   |    | -1347.768911 | 5.24 %                    |    |
| 3   |  | -1347.769451 | 9.28 %                    |   |
| 4   |  | -1347.768154 | 2.35 %                    |  |
| 5   |  | -1347.768328 | 2.82 %                    |  |

Table S11. Cartesian coordinates of the low-energy re-optimized conformers of 7*S*,8*R*,12*S*-2/7*R*,8*S*,12*R*-2 calculated at B3LYP/6-31G(d,p) level of theory.

| Conformer 1 |                          |         |         |        |                          |         |         |
|-------------|--------------------------|---------|---------|--------|--------------------------|---------|---------|
| Atomic      | Standard Orientation (Å) |         |         | Atomic | Standard Orientation (Å) |         |         |
| Type        | X                        | Y       | Z       | Type   | X                        | Y       | Z       |
| C           | -0.1847                  | 3.67554 | 1.19432 | H      | -1.3064                  | 0.7008  | 0.32669 |
| C           | -0.3307                  | 2.64492 | 2.03732 | H      | -0.1865                  | -0.5734 | 0.80352 |
| C           | 0.34759                  | 1.37156 | 1.57032 | H      | -1.0607                  | -0.3857 | 3.21422 |
| C           | 1.23631                  | 1.88519 | 0.38482 | H      | -3.4085                  | -0.4401 | 3.28872 |
| C           | 0.6948                   | 3.29695 | 0.06811 | H      | -4.592                   | 1.03998 | 1.63154 |
| O           | 0.97972                  | 3.98061 | -0.8985 | H      | -3.4008                  | 0.66479 | 0.39572 |
| C           | -0.7228                  | 0.31588 | 1.16648 | H      | -4.1135                  | -1.7435 | 0.44264 |
| C           | -1.6045                  | -0.0846 | 2.32057 | H      | -5.2809                  | -1.3809 | 1.70387 |
| C           | -2.943                   | -0.1047 | 2.35973 | H      | -6.4772                  | 0.19783 | 0.14981 |
| C           | -3.9183                  | 0.24843 | 1.26805 | H      | -5.3145                  | -0.1656 | -1.1162 |
| C           | -4.7754                  | -0.9543 | 0.82523 | H      | -6.0199                  | -2.5798 | -1.0713 |
| C           | -5.8204                  | -0.5952 | -0.2383 | H      | -7.1826                  | -2.2166 | 0.19356 |
| C           | -6.6764                  | -1.7881 | -0.6832 | H      | -8.3122                  | -2.2942 | -2.0414 |
| C           | -7.7181                  | -1.422  | -1.7455 | H      | -8.4113                  | -0.6572 | -1.374  |
| O           | 1.13662                  | 0.8877  | 2.65085 | H      | -7.2401                  | -1.0228 | -2.6486 |
| C           | 1.47626                  | 0.98377 | -0.8331 | H      | 1.58475                  | 0.07246 | 2.34919 |
| C           | 2.68184                  | 1.42697 | -1.6242 | H      | 1.58447                  | -0.0512 | -0.5104 |
| C           | 3.69691                  | 0.65121 | -2.0261 | H      | 2.69521                  | 2.48857 | -1.8577 |
| C           | 3.8768                   | -0.8376 | -1.8649 | H      | 4.51142                  | 1.1488  | -2.5564 |
| O           | 0.28549                  | 1.0569  | -1.6819 | H      | 2.92531                  | -1.3251 | -1.6291 |
| C           | 4.95973                  | -1.2301 | -0.8348 | H      | 4.18371                  | -1.2414 | -2.8395 |
| C           | 4.53499                  | -1.0182 | 0.63087 | H      | 5.87045                  | -0.645  | -1.0154 |
| C           | 3.37492                  | -1.8936 | 1.05882 | H      | 5.22654                  | -2.2828 | -0.9747 |
| C           | -0.0595                  | -0.0567 | -2.3642 | H      | 4.24858                  | 0.02048 | 0.81582 |
| O           | 0.50692                  | -1.1263 | -2.2685 | H      | 5.38086                  | -1.2511 | 1.29119 |
| C           | -1.2514                  | 0.21413 | -3.253  | H      | -2.0919                  | 0.58782 | -2.6591 |
| O           | 3.58656                  | -3.1866 | 0.77485 | H      | -1.0004                  | 0.99023 | -3.9834 |
| O           | 2.3546                   | -1.5061 | 1.60704 | H      | -1.5375                  | -0.7034 | -3.7683 |
| C           | 2.52392                  | -4.0954 | 1.12527 | H      | 2.87674                  | -5.0813 | 0.82328 |
| H           | -0.6136                  | 4.66744 | 1.28704 | H      | 2.33524                  | -4.064  | 2.20099 |
| H           | -0.8946                  | 2.64901 | 2.96464 | H      | 1.60927                  | -3.831  | 0.58941 |
| H           | 2.21918                  | 2.05437 | 0.84533 |        |                          |         |         |

| Conformer 2 |                          |         |         |        |                          |         |         |
|-------------|--------------------------|---------|---------|--------|--------------------------|---------|---------|
| Atomic      | Standard Orientation (Å) |         |         | Atomic | Standard Orientation (Å) |         |         |
| Type        | X                        | Y       | Z       | Type   | X                        | Y       | Z       |
| C           | -1.9169                  | -2.2156 | -1.2298 | H      | -1.2249                  | 0.31534 | 0.66134 |
| C           | -1.7238                  | -0.986  | -1.7281 | H      | 0.20267                  | 1.19552 | 0.11713 |
| C           | -0.4359                  | -0.3371 | -1.2579 | H      | -1.2486                  | 2.2745  | -1.7331 |
| C           | 0.34126                  | -1.5658 | -0.6743 | H      | -3.1798                  | 3.2364  | -0.8023 |
| C           | -0.7398                  | -2.6367 | -0.4364 | H      | -2.9192                  | 1.20959 | 1.5245  |
| O           | -0.6251                  | -3.6478 | 0.23201 | H      | -3.2719                  | 2.91605 | 1.74694 |
| C           | -0.7568                  | 0.77229 | -0.2142 | H      | -5.3529                  | 1.69844 | 1.88104 |
| C           | -1.6054                  | 1.87974 | -0.7833 | H      | -5.3804                  | 2.68319 | 0.42592 |
| C           | -2.7066                  | 2.42268 | -0.2481 | H      | -4.7849                  | 0.66632 | -0.9519 |
| C           | -3.3943                  | 2.075   | 1.04688 | H      | -4.7424                  | -0.3187 | 0.50035 |
| C           | -4.9042                  | 1.80313 | 0.88329 | H      | -7.174                   | 0.18258 | 0.91324 |
| C           | -5.2284                  | 0.55881 | 0.04784 | H      | -7.2173                  | 1.16974 | -0.5385 |
| C           | -6.7327                  | 0.29161 | -0.0879 | H      | -8.1334                  | -1.1158 | -1.0022 |
| C           | -7.0525                  | -0.952  | -0.9239 | H      | -6.6556                  | -0.8575 | -1.9423 |
| O           | 0.22315                  | 0.22133 | -2.3878 | H      | -6.6106                  | -1.8524 | -0.4795 |
| C           | 1.35668                  | -1.3489 | 0.45098 | H      | 0.99511                  | 0.73107 | -2.0705 |
| C           | 2.34403                  | -2.4831 | 0.55777 | H      | 1.87695                  | -0.4075 | 0.28068 |
| C           | 3.66137                  | -2.3564 | 0.35331 | H      | 1.90626                  | -3.4536 | 0.77715 |
| C           | 4.37651                  | -1.0635 | 0.02966 | H      | 4.27358                  | -3.2561 | 0.40985 |
| O           | 0.63448                  | -1.2178 | 1.7165  | H      | 3.95481                  | -0.2631 | 0.64959 |
| C           | 4.29255                  | -0.6638 | -1.4629 | H      | 5.43188                  | -1.1433 | 0.31851 |
| C           | 4.66352                  | 0.81273 | -1.7072 | H      | 3.27527                  | -0.8242 | -1.8356 |
| C           | 3.66138                  | 1.72174 | -1.0242 | H      | 4.949                    | -1.3042 | -2.0636 |
| C           | 1.11288                  | -0.3276 | 2.6101  | H      | 4.62934                  | 1.02671 | -2.7823 |
| O           | 2.05802                  | 0.41117 | 2.4109  | H      | 5.66993                  | 1.04013 | -1.3448 |
| C           | 0.30642                  | -0.3692 | 3.88695 | H      | -0.7478                  | -0.1626 | 3.67551 |
| O           | 4.22895                  | 2.52489 | -0.1192 | H      | 0.35871                  | -1.3704 | 4.32681 |
| O           | 2.45799                  | 1.70991 | -1.241  | H      | 0.69666                  | 0.36769 | 4.58975 |
| C           | 3.32976                  | 3.33819 | 0.66759 | H      | 3.97592                  | 3.98512 | 1.26068 |
| H           | -2.7849                  | -2.8513 | -1.367  | H      | 2.68073                  | 3.92794 | 0.01676 |
| H           | -2.4063                  | -0.4398 | -2.3714 | H      | 2.7284                   | 2.69466 | 1.31401 |
| H           | 0.91551                  | -1.9365 | -1.5343 |        |                          |         |         |

| Conformer 3 |                          |         |         |        |                          |         |         |
|-------------|--------------------------|---------|---------|--------|--------------------------|---------|---------|
| Atomic      | Standard Orientation (Å) |         |         | Atomic | Standard Orientation (Å) |         |         |
| Type        | X                        | Y       | Z       | Type   | X                        | Y       | Z       |
| C           | -0.1017                  | 3.84985 | -1.183  | H      | 1.34847                  | 1.1338  | -0.0234 |
| C           | 0.32611                  | 2.83743 | -1.9486 | H      | 0.53394                  | -0.3244 | -0.5851 |
| C           | -0.1955                  | 1.48082 | -1.516  | H      | 1.70738                  | -0.0716 | -2.8516 |
| C           | -1.3167                  | 1.86919 | -0.491  | H      | 4.01365                  | 0.30141 | -2.6111 |
| C           | -1.0578                  | 3.35762 | -0.1685 | H      | 4.62628                  | 2.07686 | -0.9255 |
| O           | -1.5805                  | 4.00713 | 0.71902 | H      | 3.41259                  | 1.47259 | 0.19241 |
| C           | 0.96368                  | 0.63296 | -0.9149 | H      | 5.8539                   | -0.1005 | -0.7979 |
| C           | 2.05707                  | 0.3562  | -1.9136 | H      | 5.76315                  | 0.75284 | 0.736   |
| C           | 3.37019                  | 0.58051 | -1.7737 | H      | 3.84285                  | -0.7056 | 1.43986 |
| C           | 4.1085                   | 1.16323 | -0.5965 | H      | 3.95885                  | -1.5945 | -0.0694 |
| C           | 5.16095                  | 0.20246 | -0.001  | H      | 6.17566                  | -1.421  | 2.05055 |
| C           | 4.55306                  | -1.0375 | 0.66813 | H      | 5.03704                  | -2.7471 | 1.88817 |
| C           | 5.57906                  | -1.9818 | 1.31635 | H      | 7.18705                  | -3.3773 | 0.83834 |
| C           | 6.51751                  | -2.6787 | 0.32341 | H      | 5.94866                  | -3.2503 | -0.4208 |
| O           | -0.7307                  | 0.84149 | -2.6686 | H      | 7.14548                  | -1.9629 | -0.219  |
| C           | -1.5865                  | 0.9683  | 0.72101 | H      | -1.0777                  | -0.0298 | -2.3911 |
| C           | -2.9484                  | 1.22977 | 1.3148  | H      | -1.4843                  | -0.0775 | 0.43295 |
| C           | -3.8775                  | 0.31024 | 1.60645 | H      | -3.1616                  | 2.28055 | 1.49401 |
| C           | -3.7965                  | -1.1916 | 1.49309 | H      | -4.8283                  | 0.68262 | 1.99317 |
| O           | -0.5572                  | 1.24981 | 1.72342 | H      | -2.7559                  | -1.5244 | 1.4229  |
| C           | -4.6351                  | -1.7803 | 0.33635 | H      | -4.1811                  | -1.6154 | 2.43098 |
| C           | -4.0289                  | -1.5426 | -1.0597 | H      | -5.6423                  | -1.3447 | 0.35119 |
| C           | -2.6937                  | -2.2281 | -1.2668 | H      | -4.7537                  | -2.858  | 0.48887 |
| C           | -0.1422                  | 0.2199  | 2.49268 | H      | -3.8844                  | -0.4766 | -1.2548 |
| O           | -0.5152                  | -0.9286 | 2.36598 | H      | -4.7159                  | -1.9283 | -1.8245 |
| C           | 0.85964                  | 0.69514 | 3.51953 | H      | 1.73201                  | 1.13201 | 3.02188 |
| O           | -2.7362                  | -3.527  | -0.9384 | H      | 0.41477                  | 1.47861 | 4.14128 |
| O           | -1.6783                  | -1.6963 | -1.689  | H      | 1.17064                  | -0.1453 | 4.14103 |
| C           | -1.5015                  | -4.2577 | -1.0785 | H      | -1.7333                  | -5.2768 | -0.7698 |
| H           | 0.17004                  | 4.89675 | -1.264  | H      | -1.1614                  | -4.2351 | -2.1166 |
| H           | 1.00668                  | 2.91238 | -2.7907 | H      | -0.7319                  | -3.8243 | -0.4356 |
| H           | -2.2362                  | 1.86502 | -1.0921 |        |                          |         |         |

| Conformer 4 |                          |         |         |        |                          |         |         |
|-------------|--------------------------|---------|---------|--------|--------------------------|---------|---------|
| Atomic      | Standard Orientation (Å) |         |         | Atomic | Standard Orientation (Å) |         |         |
| Type        | X                        | Y       | Z       | Type   | X                        | Y       | Z       |
| C           | -1.5075                  | -2.4158 | -1.5313 | H      | -1.1219                  | -0.1171 | 0.7086  |
| C           | -1.4961                  | -1.1123 | -1.8449 | H      | 0.15385                  | 1.0295  | 0.29237 |
| C           | -0.2987                  | -0.3659 | -1.2877 | H      | -1.4548                  | 2.18299 | -1.337  |
| C           | 0.6526                   | -1.5462 | -0.8924 | H      | -3.544                   | 2.61325 | -0.3604 |
| C           | -0.2658                  | -2.7798 | -0.811  | H      | -2.8492                  | 0.47463 | 1.75774 |
| O           | 0.00164                  | -3.8513 | -0.299  | H      | -3.9414                  | 1.83469 | 1.95888 |
| C           | -0.7449                  | 0.52529 | -0.0909 | H      | -4.428                   | -0.5828 | 0.13832 |
| C           | -1.7567                  | 1.56736 | -0.4913 | H      | -5.1258                  | -0.3432 | 1.73604 |
| C           | -2.9498                  | 1.80617 | 0.06932 | H      | -6.2952                  | 1.73391 | 0.898   |
| C           | -3.5888                  | 1.08812 | 1.23109 | H      | -5.6533                  | 1.43254 | -0.711  |
| C           | -4.7822                  | 0.188   | 0.83674 | H      | -6.8373                  | -0.7836 | -0.77   |
| C           | -5.9703                  | 0.93372 | 0.21533 | H      | -7.4869                  | -0.4782 | 0.83249 |
| C           | -7.1631                  | 0.01902 | -0.093  | H      | -9.1836                  | 0.08185 | -0.9238 |
| C           | -8.3495                  | 0.7618  | -0.7159 | H      | -8.72                    | 1.54863 | -0.0472 |
| O           | 0.25166                  | 0.43647 | -2.3248 | H      | -8.0657                  | 1.23962 | -1.6618 |
| C           | 1.65432                  | -1.3547 | 0.24969 | H      | 0.95208                  | 0.99861 | -1.9378 |
| C           | 2.79191                  | -2.3417 | 0.1849  | H      | 2.03463                  | -0.3347 | 0.21852 |
| C           | 4.0735                   | -2.0021 | -0.0033 | H      | 2.49866                  | -3.3857 | 0.26038 |
| C           | 4.59403                  | -0.588  | -0.135  | H      | 4.80598                  | -2.8051 | -0.0822 |
| O           | 0.951                    | -1.512  | 1.52269 | H      | 4.08082                  | 0.04569 | 0.59839 |
| C           | 4.41883                  | 0.00938 | -1.5516 | H      | 5.65708                  | -0.5597 | 0.13471 |
| C           | 4.57675                  | 1.54305 | -1.5764 | H      | 3.42445                  | -0.2355 | -1.9399 |
| C           | 3.47543                  | 2.19331 | -0.7632 | H      | 5.14219                  | -0.4384 | -2.243  |
| C           | 1.32108                  | -0.7016 | 2.53578 | H      | 4.48765                  | 1.90449 | -2.608  |
| O           | 2.14986                  | 0.18356 | 2.44458 | H      | 5.55056                  | 1.8537  | -1.1877 |
| C           | 0.556                    | -1.039  | 3.79405 | H      | 0.74496                  | -2.0796 | 4.07673 |
| O           | 3.94812                  | 2.92644 | 0.24931 | H      | 0.86424                  | -0.3712 | 4.5992  |
| O           | 2.28033                  | 2.04543 | -0.9759 | H      | -0.5205                  | -0.941  | 3.6193  |
| C           | 2.96437                  | 3.48186 | 1.15084 | H      | 3.52917                  | 4.11842 | 1.83173 |
| H           | -2.2823                  | -3.14   | -1.7588 | H      | 2.22531                  | 4.06451 | 0.59682 |
| H           | -2.2609                  | -0.5781 | -2.3996 | H      | 2.47263                  | 2.67283 | 1.69606 |
| H           | 1.25228                  | -1.7052 | -1.799  |        |                          |         |         |

| Conformer 5 |                          |         |         |        |                          |         |         |
|-------------|--------------------------|---------|---------|--------|--------------------------|---------|---------|
| Atomic      | Standard Orientation (Å) |         |         | Atomic | Standard Orientation (Å) |         |         |
| Type        | X                        | Y       | Z       | Type   | X                        | Y       | Z       |
| C           | -0.0578                  | 3.69214 | -1.3962 | H      | 1.25863                  | 0.98878 | -0.0556 |
| C           | 0.3247                   | 2.61364 | -2.0925 | H      | 0.37855                  | -0.4612 | -0.5301 |
| C           | -0.2623                  | 1.31356 | -1.5778 | H      | 1.56784                  | -0.3885 | -2.8097 |
| C           | -1.3675                  | 1.81919 | -0.587  | H      | 3.88777                  | -0.1421 | -2.5622 |
| C           | -1.0406                  | 3.31171 | -0.3595 | H      | 4.73974                  | 1.52688 | -0.9458 |
| O           | -1.5364                  | 4.04094 | 0.48027 | H      | 3.31731                  | 1.36587 | 0.07091 |
| C           | 0.85359                  | 0.45236 | -0.9172 | H      | 5.16969                  | 0.2795  | 1.16347 |
| C           | 1.93595                  | 0.06301 | -1.89   | H      | 4.01116                  | -0.9604 | 0.69298 |
| C           | 3.25945                  | 0.21318 | -1.7449 | H      | 5.41556                  | -1.5289 | -1.3029 |
| C           | 4.00207                  | 0.80091 | -0.5717 | H      | 6.57662                  | -0.2878 | -0.852  |
| C           | 4.74336                  | -0.2427 | 0.29669 | H      | 5.87284                  | -2.7486 | 0.84408 |
| C           | 5.85159                  | -1.0072 | -0.441  | H      | 7.25841                  | -2.6264 | -0.2263 |
| C           | 6.59836                  | -2.0369 | 0.42443 | H      | 7.98331                  | -2.2114 | 2.1008  |
| C           | 7.43491                  | -1.4324 | 1.55867 | H      | 8.17127                  | -0.7187 | 1.16779 |
| O           | -0.8235                  | 0.6278  | -2.6907 | H      | 6.81435                  | -0.9011 | 2.28888 |
| C           | -1.6824                  | 1.01222 | 0.67914 | H      | -1.2098                  | -0.2079 | -2.3606 |
| C           | -3.0336                  | 1.37204 | 1.24543 | H      | -1.6259                  | -0.0537 | 0.46054 |
| C           | -4.0034                  | 0.51543 | 1.59104 | H      | -3.2006                  | 2.44069 | 1.35394 |
| C           | -3.9884                  | -0.9928 | 1.57697 | H      | -4.9382                  | 0.95382 | 1.94633 |
| O           | -0.6462                  | 1.31262 | 1.66887 | H      | -2.9633                  | -1.3748 | 1.53569 |
| C           | -4.8478                  | -1.6189 | 0.45557 | H      | -4.3951                  | -1.3366 | 2.53796 |
| C           | -4.226                   | -1.5007 | -0.9488 | H      | -5.8346                  | -1.1394 | 0.43477 |
| C           | -2.921                   | -2.2554 | -1.1012 | H      | -5.0147                  | -2.678  | 0.67779 |
| C           | -0.2776                  | 0.3164  | 2.5034  | H      | -4.0344                  | -0.4573 | -1.2131 |
| O           | -0.6938                  | -0.8227 | 2.44265 | H      | -4.9261                  | -1.9062 | -1.6913 |
| C           | 0.728                    | 0.81663 | 3.51447 | H      | 1.59164                  | 1.25815 | 3.00688 |
| O           | -3.0203                  | -3.5258 | -0.6852 | H      | 0.27574                  | 1.60283 | 4.12804 |
| O           | -1.8827                  | -1.7974 | -1.5528 | H      | 1.04971                  | -0.0104 | 4.14836 |
| C           | -1.8177                  | -4.3164 | -0.7681 | H      | -2.0944                  | -5.3016 | -0.3932 |
| H           | 0.26361                  | 4.71771 | -1.5422 | H      | -1.4731                  | -4.3782 | -1.803  |
| H           | 1.01172                  | 2.60234 | -2.9326 | H      | -1.0326                  | -3.8741 | -0.1504 |
| H           | -2.2844                  | 1.81855 | -1.1922 |        |                          |         |         |

Table S12. Experimental and calculated  $^1\text{H}$  NMR data for compound **2**.

| No.   | <b>2</b> , exptl. $\delta_{\text{H}}$ <sup>a</sup> | 7 <i>S</i> ,8 <i>R</i> ,12 <i>R</i> - <b>2</b> , calcd. $\delta_{\text{H}}$ <sup>b</sup> | 7 <i>S</i> ,8 <i>R</i> ,12 <i>S</i> - <b>2</b> , calcd. $\delta_{\text{H}}$ <sup>b</sup> |
|-------|----------------------------------------------------|------------------------------------------------------------------------------------------|------------------------------------------------------------------------------------------|
| 2     | 2.34                                               | 2.48                                                                                     | 2.38                                                                                     |
| 3     | 1.72                                               | 1.88                                                                                     | 1.89                                                                                     |
| 4     | 2.22                                               | 2.40                                                                                     | 2.46                                                                                     |
| 5     | 5.57                                               | 6.10                                                                                     | 6.02                                                                                     |
| 6     | 5.85                                               | 6.55                                                                                     | 7.01                                                                                     |
| 7     | 5.94                                               | 5.81                                                                                     | 5.90                                                                                     |
| 8     | 2.55                                               | 2.41                                                                                     | 2.71                                                                                     |
| 10    | 6.17                                               | 6.40                                                                                     | 6.36                                                                                     |
| 11    | 7.43                                               | 7.94                                                                                     | 8.09                                                                                     |
| 13    | 2.56                                               | 3.11                                                                                     | 2.58                                                                                     |
|       | 2.34                                               | 2.40                                                                                     | 2.48                                                                                     |
| 14    | 5.36                                               | 5.70                                                                                     | 6.42                                                                                     |
| 15    | 5.65                                               | 6.01                                                                                     | 6.07                                                                                     |
| 16    | 2                                                  | 2.25                                                                                     | 2.05                                                                                     |
| 17    | 1.35                                               | 1.41                                                                                     | 1.31                                                                                     |
| 18    | 1.27                                               | 1.29                                                                                     | 1.28                                                                                     |
| 19    | 1.3                                                | 1.38                                                                                     | 1.40                                                                                     |
| 20    | 0.89                                               | 1.02                                                                                     | 1.02                                                                                     |
| 1-OMe | 3.68                                               | 4.04                                                                                     | 3.94                                                                                     |
| 2'    | 1.99                                               | 2.06                                                                                     | 2.02                                                                                     |

<sup>a</sup> Recorded in  $\text{CDCl}_3$  at 600 MHz.<sup>b</sup> Calculated in  $\text{CDCl}_3$



Table S13. Experimental and calculated  $^{13}\text{C}$  NMR data for compound **2**.

| No.   | <b>2</b> , exptl. $\delta_{\text{C}}$ <sup>a</sup> | 7 <i>S</i> ,8 <i>R</i> ,12 <i>R</i> - <b>2</b> , calcd. $\delta_{\text{C}}$ <sup>b</sup> | 7 <i>S</i> ,8 <i>R</i> ,12 <i>S</i> - <b>2</b> , calcd. $\delta_{\text{C}}$ <sup>b</sup> |
|-------|----------------------------------------------------|------------------------------------------------------------------------------------------|------------------------------------------------------------------------------------------|
| 1     | 174                                                | 178.7                                                                                    | 180.1                                                                                    |
| 2     | 33.4                                               | 30.5                                                                                     | 31.3                                                                                     |
| 3     | 24.5                                               | 23.1                                                                                     | 23.1                                                                                     |
| 4     | 27                                                 | 24.4                                                                                     | 23.9                                                                                     |
| 5     | 133.3                                              | 136.5                                                                                    | 134.6                                                                                    |
| 6     | 129.6                                              | 130.8                                                                                    | 131.3                                                                                    |
| 7     | 68.3                                               | 65.0                                                                                     | 63.7                                                                                     |
| 8     | 57.2                                               | 52.5                                                                                     | 61.9                                                                                     |
| 9     | 204.8                                              | 206.9                                                                                    | 204.0                                                                                    |
| 10    | 133.7                                              | 134.1                                                                                    | 132.6                                                                                    |
| 11    | 165.4                                              | 171.6                                                                                    | 172.8                                                                                    |
| 12    | 79.5                                               | 79.0                                                                                     | 79.9                                                                                     |
| 13    | 39.3                                               | 36.5                                                                                     | 33.4                                                                                     |
| 14    | 121.8                                              | 125.3                                                                                    | 126.8                                                                                    |
| 15    | 135.7                                              | 136.7                                                                                    | 133.7                                                                                    |
| 16    | 27.4                                               | 26.3                                                                                     | 27.1                                                                                     |
| 17    | 29.1                                               | 28.0                                                                                     | 28.6                                                                                     |
| 18    | 31.5                                               | 29.6                                                                                     | 30.4                                                                                     |
| 19    | 22.5                                               | 21.8                                                                                     | 21.9                                                                                     |
| 20    | 14                                                 | 10.4                                                                                     | 10.4                                                                                     |
| 1-OMe | 51.6                                               | 48.9                                                                                     | 49.8                                                                                     |
| 1'    | 170.3                                              | 170.2                                                                                    | 171.9                                                                                    |
| 2'    | 21.2                                               | 17.0                                                                                     | 18.0                                                                                     |

<sup>a</sup> Recorded in  $\text{CDCl}_3$  at 600 MHz.<sup>b</sup> Calculated in  $\text{CDCl}_3$

Table S14. DP4+ analyses of calculated and experimental NMR chemical shifts of **2** (unscaled). Isomer 1: 7*S*,8*R*,12*R*-**2**; Isomer 2: 7*S*,8*R*,12*S*-**2**

| Functional       | Solvent?                                                                                  |                                                                                          | Basis Set    |          | Type of Data    |          |
|------------------|-------------------------------------------------------------------------------------------|------------------------------------------------------------------------------------------|--------------|----------|-----------------|----------|
| mPW1PW91         | PCM                                                                                       |                                                                                          | 6-311+G(d,p) |          | Unscaled Shifts |          |
|                  | Isomer 1                                                                                  | Isomer 2                                                                                 | Isomer 3     | Isomer 4 | Isomer 5        | Isomer 6 |
| sDP4+ (H data)   |  83.83%  |  16.17% | -            | -        | -               | -        |
| sDP4+ (C data)   |  100.00% |  0.00%  | -            | -        | -               | -        |
| sDP4+ (all data) |  100.00% |  0.00%  | -            | -        | -               | -        |
| uDP4+ (H data)   |  99.02%  |  0.98%  | -            | -        | -               | -        |
| uDP4+ (C data)   |  3.91%   |  96.09% | -            | -        | -               | -        |
| uDP4+ (all data) |  80.49%  |  19.51% | -            | -        | -               | -        |
| DP4+ (H data)    |  99.81%  |  0.19%  | -            | -        | -               | -        |
| DP4+ (C data)    |  100.00% |  0.00%  | -            | -        | -               | -        |
| DP4+ (all data)  |  100.00% |  0.00%  | -            | -        | -               | -        |

| Functional<br>mPW1PW91 |      | Solvent?<br>PCM |            | Basis Set<br>6-311+G(d,p) |          | Type of Data<br>Unscaled Shifts |          |
|------------------------|------|-----------------|------------|---------------------------|----------|---------------------------------|----------|
|                        |      | DP4+            | 100.00%    | 0.00%                     | -        | -                               | -        |
| Nuclei                 | sp2? | Experimenta     | Isomer 1   | Isomer 2                  | Isomer 3 | Isomer 4                        | Isomer 5 |
| C                      | x    | 174.0           | 178.7      | 180.1                     |          |                                 |          |
| C                      |      | 33.4            | 30.5       | 31.3                      |          |                                 |          |
| C                      |      | 24.5            | 23.1       | 23.1                      |          |                                 |          |
| C                      |      | 27.0            | 24.4       | 23.9                      |          |                                 |          |
| C                      | x    | 133.3           | 136.5      | 134.6                     |          |                                 |          |
| C                      | x    | 129.6           | 130.8      | 131.3                     |          |                                 |          |
| C                      |      | 68.3            | 65.0       | 63.7                      |          |                                 |          |
| C                      |      | 57.2            | 52.5       | 61.9                      |          |                                 |          |
| C                      | x    | 204.8           | 206.9      | 204.0                     |          |                                 |          |
| C                      | x    | 133.7           | 134.1      | 132.6                     |          |                                 |          |
| C                      | x    | 165.4           | 171.6      | 172.8                     |          |                                 |          |
| C                      |      | 79.5            | 78.98      | 79.91                     |          |                                 |          |
| C                      |      | 39.3            | 36.45      | 33.45                     |          |                                 |          |
| C                      | x    | 121.8           | 125.30     | 126.77                    |          |                                 |          |
| C                      | x    | 135.7           | 136.73     | 133.75                    |          |                                 |          |
| C                      |      | 27.4            | 26.28      | 27.10                     |          |                                 |          |
| C                      |      | 29.1            | 27.98      | 28.59                     |          |                                 |          |
| C                      |      | 31.5            | 29.58      | 30.36                     |          |                                 |          |
| C                      |      | 22.5            | 21.79      | 21.89                     |          |                                 |          |
| C                      |      | 14.0            | 10.40      | 10.36                     |          |                                 |          |
| C                      |      | 51.6            | 48.87      | 49.75                     |          |                                 |          |
| C                      | x    | 170.3           | 170.22     | 171.86                    |          |                                 |          |
| C                      |      | 21.2            | 17.03      | 17.99                     |          |                                 |          |
| H                      |      | 2.3             | 2.48       | 2.38                      |          |                                 |          |
| H                      |      | 1.7             | 1.88       | 1.89                      |          |                                 |          |
| H                      |      | 2.22            | 2.3999751  | 2.45825543                |          |                                 |          |
| H                      | x    | 5.57            | 6.10101227 | 6.02000694                |          |                                 |          |
| H                      | x    | 5.85            | 6.55245404 | 7.01225953                |          |                                 |          |
| H                      |      | 5.94            | 5.81206222 | 5.89869416                |          |                                 |          |
| H                      |      | 2.55            | 2.4114666  | 2.71207999                |          |                                 |          |
| H                      | x    | 6.17            | 6.40119312 | 6.35704911                |          |                                 |          |
| H                      | x    | 7.43            | 7.94088827 | 8.0875924                 |          |                                 |          |
| H                      |      | 2.56            | 3.11240124 | 2.58422038                |          |                                 |          |
| H                      |      | 2.34            | 2.40440269 | 2.48382623                |          |                                 |          |
| H                      | x    | 5.36            | 5.70232067 | 6.42483296                |          |                                 |          |
| H                      | x    | 5.65            | 6.00938708 | 6.07013901                |          |                                 |          |
| H                      |      | 2.00            | 2.2537362  | 2.05059299                |          |                                 |          |
| H                      |      | 1.35            | 1.41051741 | 1.31460266                |          |                                 |          |
| H                      |      | 1.27            | 1.29085926 | 1.27875256                |          |                                 |          |
| H                      |      | 1.30            | 1.37931264 | 1.39857795                |          |                                 |          |
| H                      |      | 0.89            | 1.01984823 | 1.02190545                |          |                                 |          |
| H                      |      | 3.68            | 4.04144572 | 3.94368397                |          |                                 |          |
| H                      |      | 1.99            | 2.05722616 | 2.02193488                |          |                                 |          |

Table S15. *In silico* prediction of cytotoxicity of the compounds for human tumor cell lines.

|    | Cell-line | Description                           | Tissue/Organ | <i>Pa</i> | <i>Pi</i> | IAP   |
|----|-----------|---------------------------------------|--------------|-----------|-----------|-------|
| 1  | A2780cisR | Cisplatin-resistant ovarian carcinoma | Ovary        | 0.814     | 0.026     | 0.838 |
| 1  | PC-3      | Prostate carcinoma                    | Prostate     | 0.798     | 0.005     | 0.883 |
| 2  | A2780cisR | Cisplatin-resistant ovarian carcinoma | Ovary        | 0.928     | 0.004     | 0.838 |
| 3  | A2780cisR | Cisplatin-resistant ovarian carcinoma | Ovary        | 0.896     | 0.006     | 0.838 |
| 3  | PC-3      | Prostate carcinoma                    | Prostate     | 0.767     | 0.007     | 0.883 |
| 4  | PC-3      | Prostate carcinoma                    | Prostate     | 0.911     | 0.004     | 0.883 |
| 4  | A2780cisR | Cisplatin-resistant ovarian carcinoma | Ovary        | 0.904     | 0.005     | 0.838 |
| 5  | A2780cisR | Cisplatin-resistant ovarian carcinoma | Ovary        | 0.869     | 0.011     | 0.838 |
| 5  | PC-3      | Prostate carcinoma                    | Prostate     | 0.858     | 0.005     | 0.883 |
| 6  | PC-3      | Prostate carcinoma                    | Prostate     | 0.828     | 0.005     | 0.883 |
| 6  | A2780cisR | Cisplatin-resistant ovarian carcinoma | Ovary        | 0.790     | 0.035     | 0.838 |
| 7  | A2780cisR | Cisplatin-resistant ovarian carcinoma | Ovary        | 0.869     | 0.011     | 0.838 |
| 7  | PC-3      | Prostate carcinoma                    | Prostate     | 0.858     | 0.005     | 0.883 |
| 8  | PC-3      | Prostate carcinoma                    | Prostate     | 0.982     | 0.003     | 0.883 |
| 8  | HT-29     | Colon adenocarcinoma                  | Colon        | 0.935     | 0.004     | 0.888 |
| 8  | A2780cisR | Cisplatin-resistant ovarian carcinoma | Ovary        | 0.846     | 0.017     | 0.838 |
| 9  | PC-3      | Prostate carcinoma                    | Prostate     | 0.854     | 0.005     | 0.883 |
| 9  | A2780cisR | Cisplatin-resistant ovarian carcinoma | Ovary        | 0.747     | 0.051     | 0.838 |
| 10 | PC-3      | Prostate carcinoma                    | Prostate     | 0.920     | 0.004     | 0.883 |
| 10 | A2780cisR | Cisplatin-resistant ovarian carcinoma | Ovary        | 0.904     | 0.005     | 0.838 |
| 11 | PC-3      | Prostate carcinoma                    | Prostate     | 0.911     | 0.004     | 0.883 |
| 11 | A2780cisR | Cisplatin-resistant ovarian carcinoma | Ovary        | 0.904     | 0.005     | 0.838 |
| 12 | PC-3      | Prostate carcinoma                    | Prostate     | 0.879     | 0.005     | 0.883 |
| 12 | A2780cisR | Cisplatin-resistant ovarian carcinoma | Ovary        | 0.859     | 0.013     | 0.838 |
| 13 | PC-3      | Prostate carcinoma                    | Prostate     | 0.879     | 0.005     | 0.883 |
| 13 | A2780cisR | Cisplatin-resistant ovarian carcinoma | Ovary        | 0.859     | 0.013     | 0.838 |

*Pa*: the probability of “to be active”.

*Pi*: the probability of “to be inactive”.

IAP: Invariant accuracy of prediction.

Table S16. *In silico* prediction of the nitric oxide (NO) production inhibition activity of the compounds.

|                       | <b>Predictions</b> |
|-----------------------|--------------------|
| <b>1</b>              | 0.319              |
| <b>2</b>              | 0.329              |
| <b>3</b>              | 0.344              |
| <b>4</b>              | 0.325              |
| <b>5</b>              | 0.365              |
| <b>6</b>              | 0.430              |
| <b>7</b>              | 0.339              |
| <b>8</b>              | 0.326              |
| <b>9</b>              | 0.310              |
| <b>10</b>             | 0.383              |
| <b>11</b>             | 0.345              |
| <b>12</b>             | 0.344              |
| <b>13</b>             | 0.372              |
| <b>Aminoguanidine</b> | 0.657              |
| <b>Apigenin</b>       | 0.621              |

Predictions: the predicted probabilities of test compounds with the IC<sub>50</sub> (inhibition for NO production) < 50 µM in macrophages.

Table S17. The *in silico* predicted water solubility of the compounds.

|    | ESOL model   |                    | Ali model    |                    | SILICOS-IT model |                    |
|----|--------------|--------------------|--------------|--------------------|------------------|--------------------|
|    | Log <i>S</i> | Class              | Log <i>S</i> | Class              | Log <i>S</i>     | Class              |
| 1  | -3.48        | Soluble            | -4.96        | Moderately soluble | -3.79            | Soluble            |
| 2  | -3.61        | Soluble            | -5.13        | Moderately soluble | -3.79            | Soluble            |
| 3  | -4.81        | Moderately soluble | -5.82        | Moderately soluble | -4.83            | Moderately soluble |
| 4  | -3.99        | Soluble            | -5.43        | Moderately soluble | -4.20            | Moderately soluble |
| 5  | -3.39        | Soluble            | -4.71        | Moderately soluble | -3.26            | Soluble            |
| 6  | --           | --                 | --           | --                 | --               | --                 |
| 7  | -3.39        | Soluble            | -4.71        | Moderately soluble | -3.26            | Soluble            |
| 8  | -4.70        | Moderately soluble | -5.40        | Moderately soluble | -4.64            | Moderately soluble |
| 9  | --           | --                 | --           | --                 | --               | --                 |
| 10 | -3.50        | Soluble            | -4.72        | Moderately soluble | -3.58            | Soluble            |
| 11 | -4.35        | Moderately soluble | -6.00        | Moderately soluble | -4.60            | Moderately soluble |
| 12 | --           | --                 | --           | --                 | --               | --                 |
| 13 | --           | --                 | --           | --                 | --               | --                 |

Class: solubility class, Log *S* scale, Insoluble < -10 < Poorly < -6 < Moderately < -4 < Soluble < -2 < Very < 0 < Highly.

--: the compounds were not suitable for the *in silico* tool.

Table S18. The *in silico* predicted pharmacokinetics of the compounds.

|    | GI absorption | BBB permeant | P-gp substrate | Inhibitors for CYP |      |     |     |     | Log <i>K<sub>p</sub></i> (cm/s) |
|----|---------------|--------------|----------------|--------------------|------|-----|-----|-----|---------------------------------|
|    |               |              |                | 1A2                | 2C19 | 2C9 | 2D6 | 3A4 |                                 |
| 1  | High          | No           | Yes            | No                 | Yes  | Yes | Yes | No  | -7.04                           |
| 2  | High          | No           | Yes            | No                 | Yes  | Yes | Yes | No  | -6.25                           |
| 3  | High          | No           | Yes            | Yes                | Yes  | No  | Yes | Yes | -6.55                           |
| 4  | High          | Yes          | Yes            | Yes                | Yes  | Yes | Yes | No  | -5.56                           |
| 5  | High          | No           | Yes            | Yes                | Yes  | Yes | Yes | No  | -6.45                           |
| 6  | --            | --           | --             | --                 | --   | --  | --  | --  | --                              |
| 7  | High          | No           | Yes            | Yes                | Yes  | Yes | Yes | No  | -6.45                           |
| 8  | High          | Yes          | Yes            | Yes                | Yes  | Yes | Yes | No  | -6.01                           |
| 9  | --            | --           | --             | --                 | --   | --  | --  | --  | --                              |
| 10 | High          | Yes          | Yes            | Yes                | Yes  | Yes | Yes | No  | -5.71                           |
| 11 | High          | Yes          | Yes            | Yes                | Yes  | Yes | Yes | Yes | -5.26                           |
| 12 | --            | --           | --             | --                 | --   | --  | --  | --  | --                              |
| 13 | --            | --           | --             | --                 | --   | --  | --  | --  | --                              |

**GI absorption:** Gastrointestinal absorption; **BBB permeation:** blood-brain barrier permeation; **P-gp substrate:** P-glycoprotein substrate; **CYP:** Cytochrome P450; **Log *K<sub>p</sub>*:** for skin permeation.

--: the compounds were not suitable for the *in silico* tool.

Table S19. The *in silico* evaluation of the compounds for druglikeness.

|           | <b>Lipinsk</b>                          | <b>Ghose</b>                            | <b>Veber</b>                               | <b>Egan</b> | <b>Muegge</b>                              | <b>Bioavailability score</b> |
|-----------|-----------------------------------------|-----------------------------------------|--------------------------------------------|-------------|--------------------------------------------|------------------------------|
| <b>1</b>  | Yes                                     | Yes                                     | <b>No</b> ;<br>1 violation:<br>Rotors > 10 | Yes         | <b>No</b> ;<br>1 violation:<br>Rotors > 15 | 0.55                         |
| <b>2</b>  | Yes                                     | Yes                                     | <b>No</b> ;<br>1 violation:<br>Rotors > 10 | Yes         | Yes                                        | 0.55                         |
| <b>3</b>  | <b>No</b> ;<br>1 violation:<br>MW > 500 | <b>No</b> ;<br>1 violation:<br>MW > 480 | <b>No</b> ;<br>1 violation:<br>Rotors > 10 | Yes         | Yes                                        | 0.55                         |
| <b>4</b>  | Yes                                     | Yes                                     | <b>No</b> ;<br>1 violation:<br>Rotors > 10 | Yes         | Yes                                        | 0.55                         |
| <b>5</b>  | Yes                                     | Yes                                     | <b>No</b> ;<br>1 violation:<br>Rotors > 10 | Yes         | Yes                                        | 0.55                         |
| <b>6</b>  | --                                      | --                                      | --                                         | --          | --                                         | --                           |
| <b>7</b>  | Yes                                     | Yes                                     | <b>No</b> ;<br>1 violation:<br>Rotors > 10 | Yes         | Yes                                        | 0.55                         |
| <b>8</b>  | Yes                                     | Yes                                     | <b>No</b> ;<br>1 violation:<br>Rotors > 10 | Yes         | Yes                                        | 0.55                         |
| <b>9</b>  | --                                      | --                                      | --                                         | --          | --                                         | --                           |
| <b>10</b> | Yes                                     | Yes                                     | <b>No</b> ;<br>1 violation:<br>Rotors > 10 | Yes         | Yes                                        | 0.55                         |
| <b>11</b> | Yes                                     | Yes                                     | <b>No</b> ;<br>1 violation:<br>Rotors > 10 | Yes         | Yes                                        | 0.55                         |
| <b>12</b> | --                                      | --                                      | --                                         | --          | --                                         | --                           |
| <b>13</b> | --                                      | --                                      | --                                         | --          | --                                         | --                           |

--: the compounds were not suitable for the *in silico* tool.

Table S20. The *in silico* evaluation of the compounds for medicinal chemistry.

|           | <b>PAINS</b>                   | <b>Brenk</b>                                                                      | <b>Leadlikeness</b>                                             | <b>Synthetic accessibility</b> |
|-----------|--------------------------------|-----------------------------------------------------------------------------------|-----------------------------------------------------------------|--------------------------------|
| <b>1</b>  | 0 alert                        | <b>2 alerts:</b><br>michael acceptor 1,<br>more than 2 esters                     | <b>No</b> ; 2 violations:<br>MW > 350, Rotors > 7               | 5.39                           |
| <b>2</b>  | 0 alert                        | <b>2 alerts:</b><br>isolated alkene,<br>more than 2 esters                        | <b>No</b> ; 3 violations:<br>MW > 350, Rotors > 7, XLOGP3 > 3.5 | 5.22                           |
| <b>3</b>  | <b>1 alert:</b><br>ene one hal | <b>3 alerts:</b><br>iodine, isolated alkene, more than 2 esters                   | <b>No</b> ; 3 violations:<br>MW > 350, Rotors > 7, XLOGP3 > 3.5 | 5.41                           |
| <b>4</b>  | 0 alert                        | <b>3 alerts:</b><br>isolated alkene,<br>michael acceptor 1,<br>more than 2 esters | <b>No</b> ; 3 violations:<br>MW > 350, Rotors > 7, XLOGP3 > 3.5 | 4.83                           |
| <b>5</b>  | 0 alert                        | <b>3 alerts:</b><br>isolated alkene,<br>michael acceptor 1,<br>more than 2 esters | <b>No</b> ; 2 violations: MW > 350,<br>Rotors > 7               | 5.20                           |
| <b>6</b>  | --                             | --                                                                                | --                                                              | --                             |
| <b>7</b>  | 0 alert                        | <b>3 alerts:</b><br>isolated alkene,<br>michael acceptor 1,<br>more than 2 esters | <b>No</b> ; 2 violations: MW > 350,<br>Rotors > 7               | 5.20                           |
| <b>8</b>  | <b>1 alert:</b><br>ene one hal | <b>3 alerts:</b><br>iodine, isolated alkene,<br>michael acceptor 1                | <b>No</b> ; 3 violations: MW > 350,<br>Rotors > 7, XLOGP3 > 3.5 | 4.78                           |
| <b>9</b>  | --                             | --                                                                                | --                                                              | --                             |
| <b>10</b> | 0 alert                        | <b>2 alerts:</b> isolated alkene,<br>michael acceptor 1                           | <b>No</b> ; 2 violations: Rotors > 7,<br>XLOGP3 > 3.5           | 4.58                           |
| <b>11</b> | 0 alert                        | <b>3 alerts:</b> isolated alkene,<br>michael acceptor 1,<br>more than 2 esters    | <b>No</b> ; 3 violations: MW > 350,<br>Rotors > 7, XLOGP3 > 3.5 | 4.95                           |
| <b>12</b> | --                             | --                                                                                | --                                                              | --                             |
| <b>13</b> | --                             | --                                                                                | --                                                              | --                             |

PAINS: Pan Assay Interference Structures.

Synthetic score: the synthetic accessibility score; from 1 (very easy) to 10 (very difficult).

--: the compounds were not suitable for the *in silico* tool.



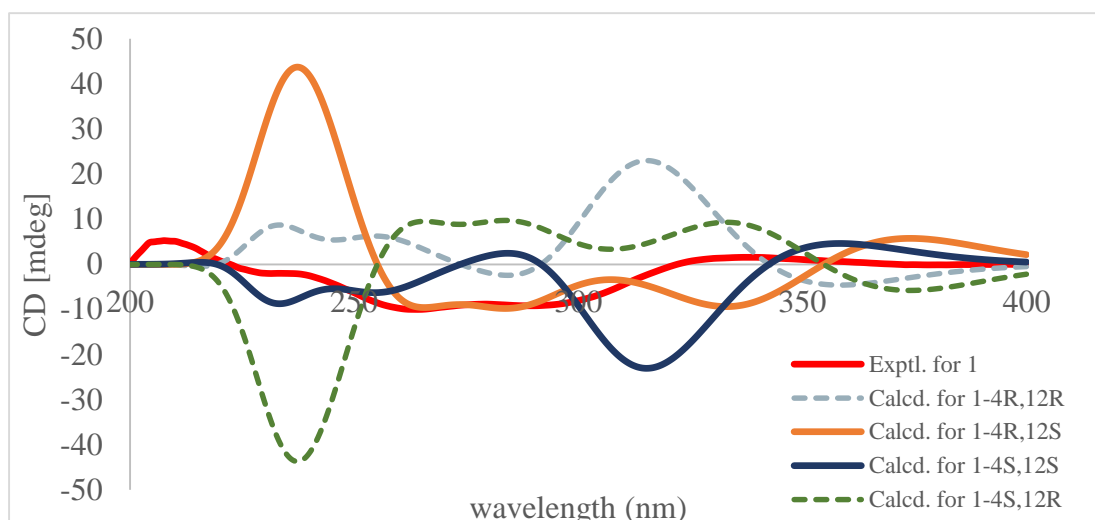

**Note:** The ECD curves of *4R,12S* and *4S,12S* were generated by software calculation. The curves of *4R,12R* and *4S,12R* are directly transformed from their enantiomers *4R,12S* and *4S,12S*.

Figure S1. Experimental and Calculated ECD of **1**

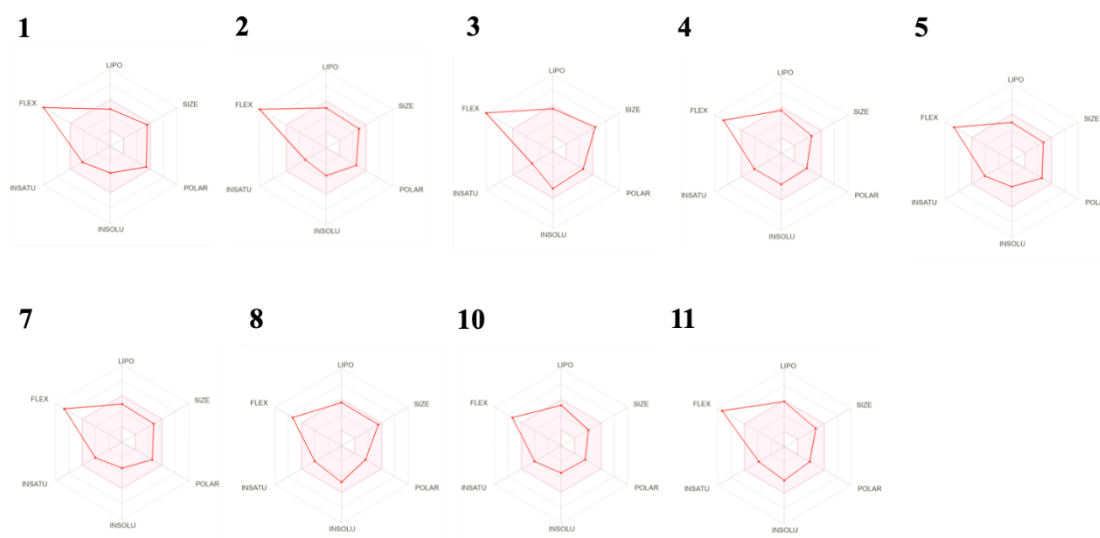

Figure S2. The predicted oral bioavailability of nine compounds.

The colored zone could be the suitable physicochemical space of the ideal compound predicted by the in silico tool SwissADME, and six red spots were the predicted values of the test compound. Lipophilicity (LIPO):  $-0.7 < \text{XLOGP3} < +5.0$ ; size (SIZE):  $150\text{g/mol} < \text{MW} < 500\text{ g/mol}$ ; polarity (POLAR):  $20 \text{ \AA}^2 < \text{TPSA} < 130 \text{ \AA}^2$ ; insolubility (INSOLU):  $-6 < \text{Log S (ESOL)} < 0$ ; insaturation (INSATU):  $0.25 < \text{Fraction Csp3} < 1$ ; flexibility (FLEX):  $0 < \text{Num. rotatable bonds} < 9$ . Almost all of the five values of nine compounds were located in the colored zone, but only one value (size) of compound **3** was not located in the colored zone. Only one value (flexibility) of nine compounds was not located in the colored zone.

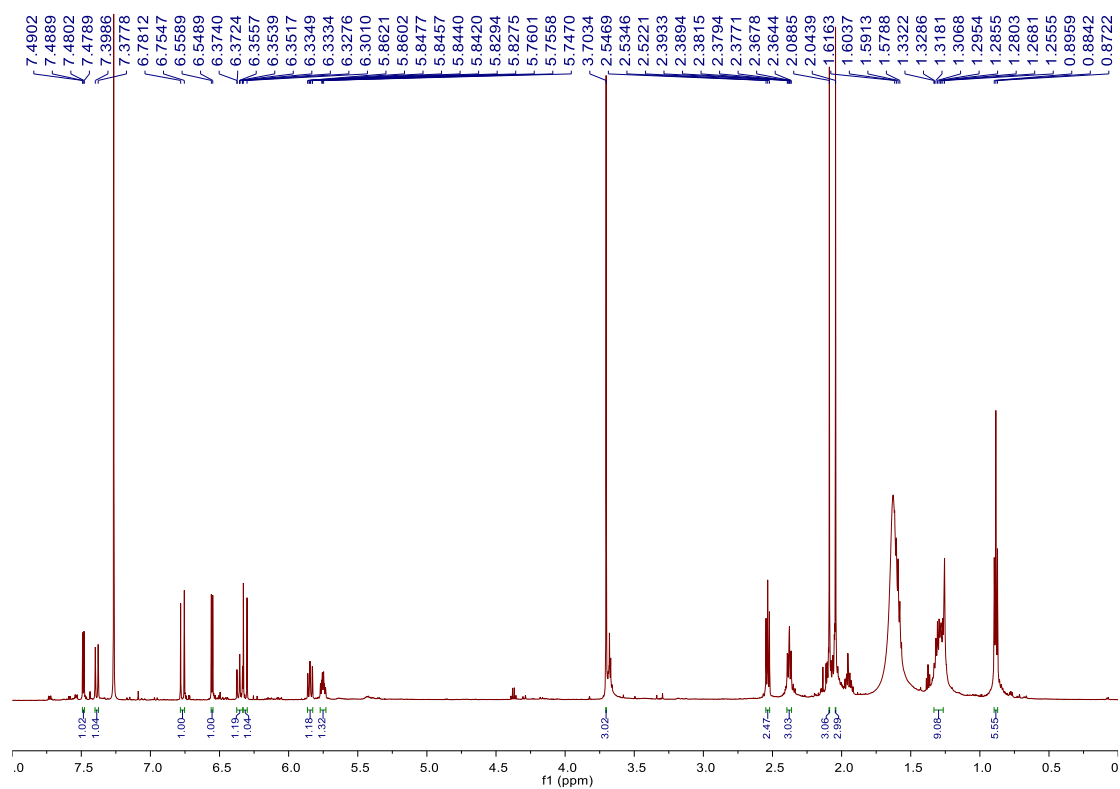

Figure S3. <sup>1</sup>H NMR spectrum of **1** (600 MHz, CDCl<sub>3</sub>)

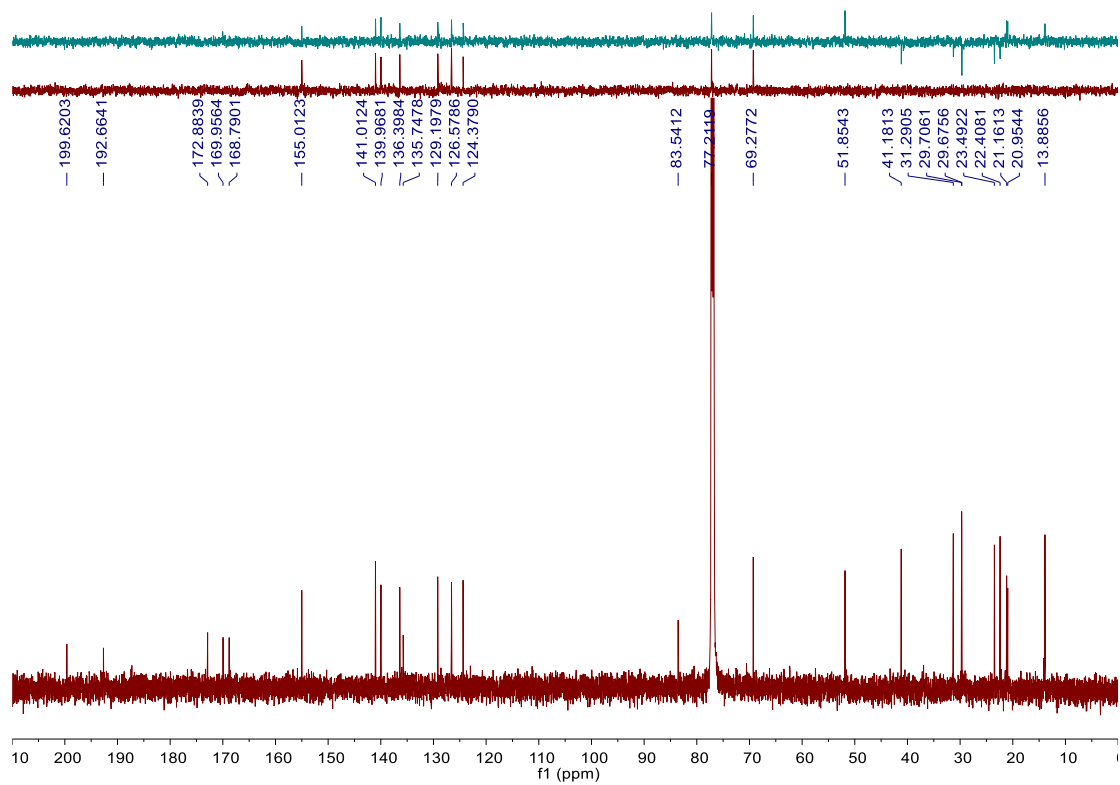

Figure S4. <sup>13</sup>C NMR spectrum of **1** (125 MHz, CDCl<sub>3</sub>)

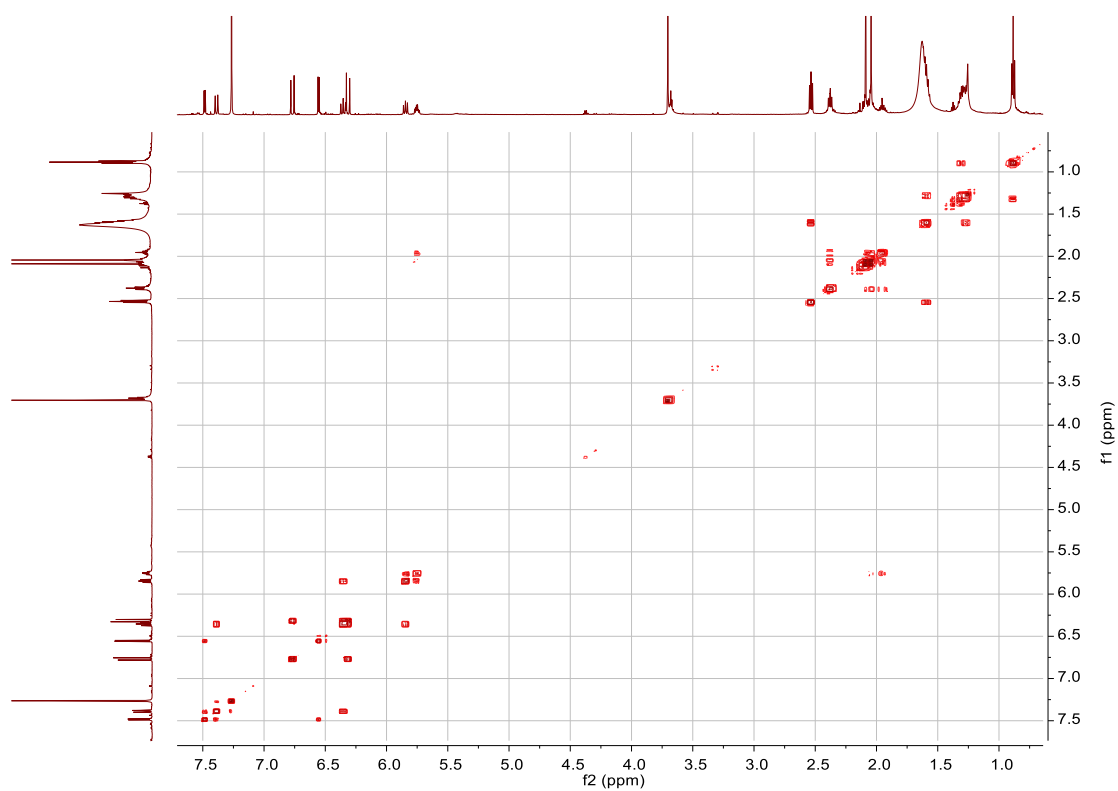

Figure S5. COSY spectrum of **1**

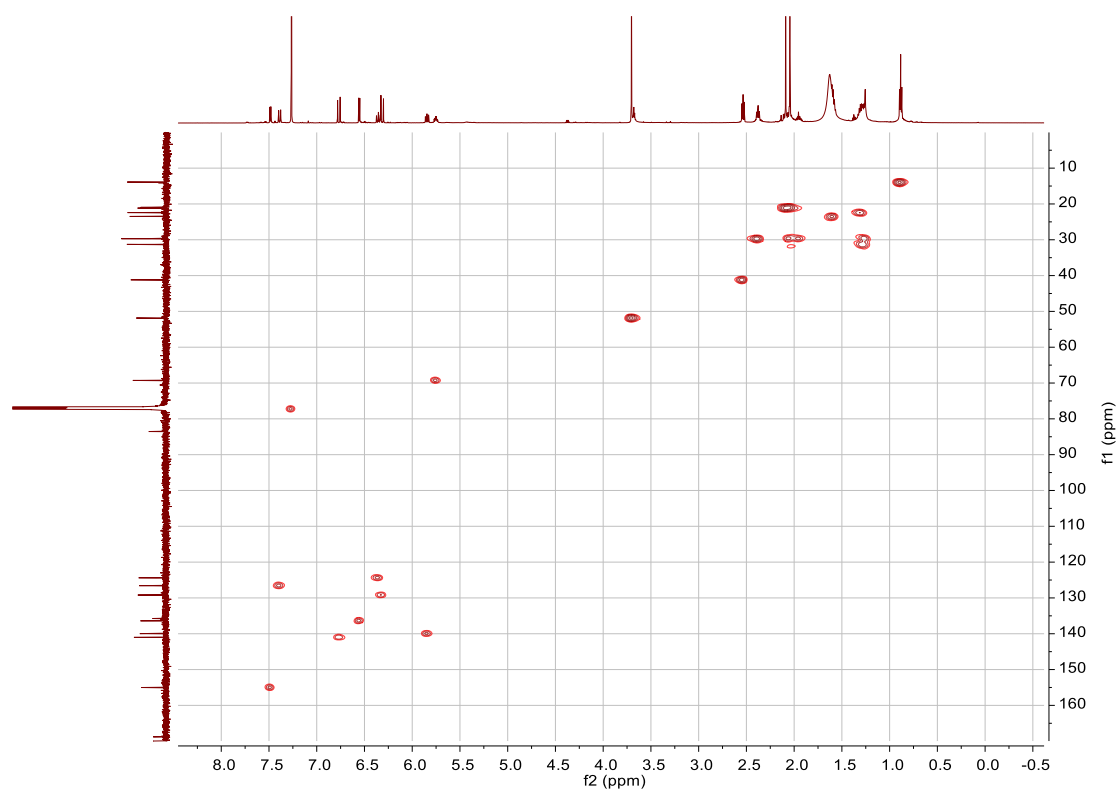

Figure S6. HSQC spectrum of **1**

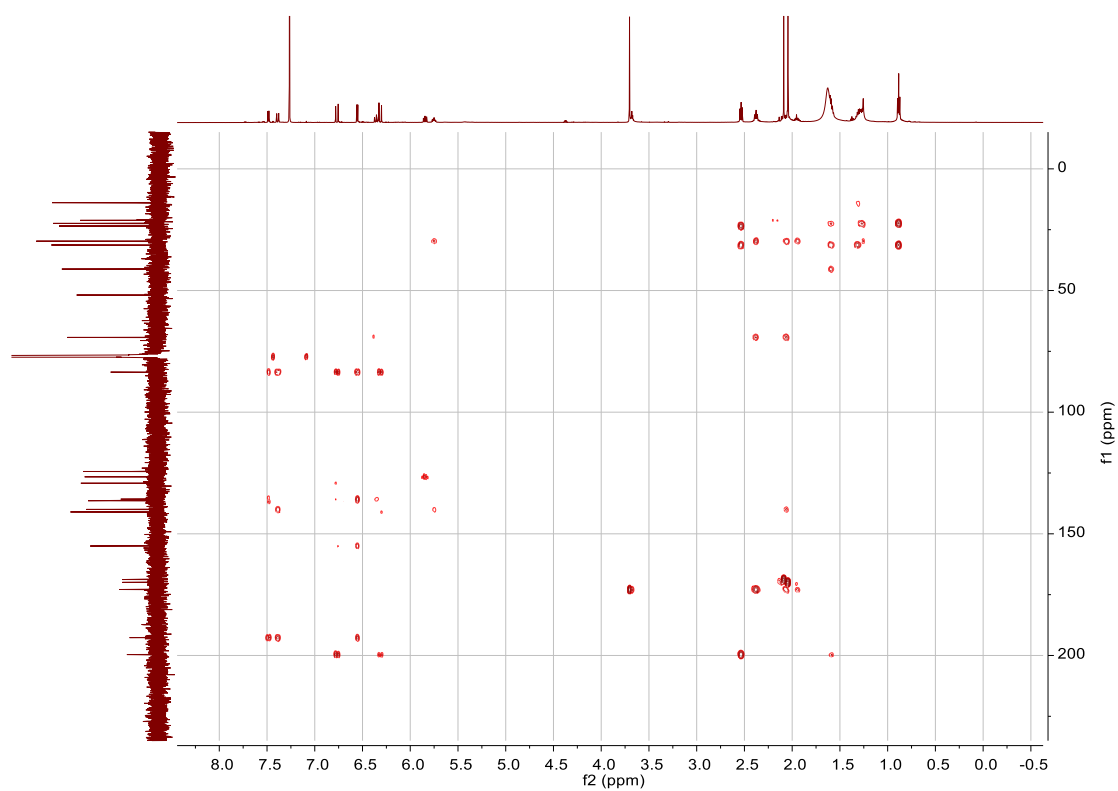

Figure S7. HMBC spectrum of **1**

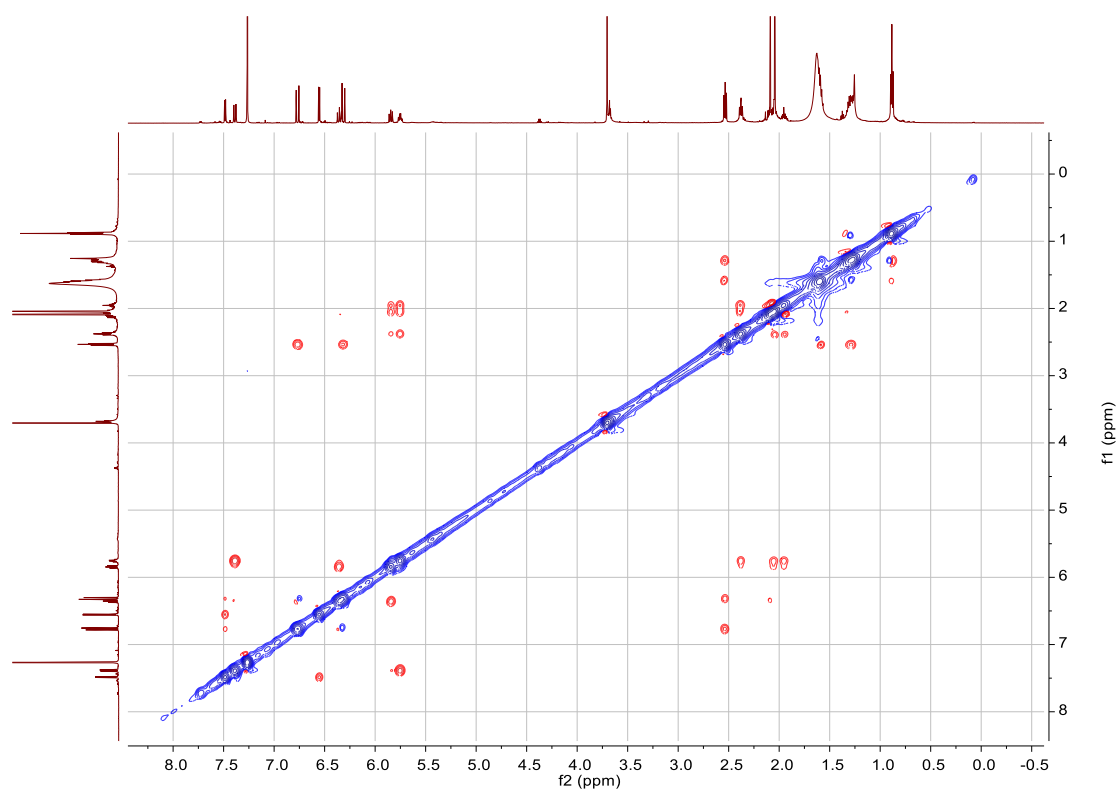

Figure S8. NOESY spectrum of **1**

CI-AU\_20230609013709 #17 RT: 0.12 AV: 1 NL: 2.74E8  
T: FTMS + p ESI Full ms [100.0000-1000.0000]

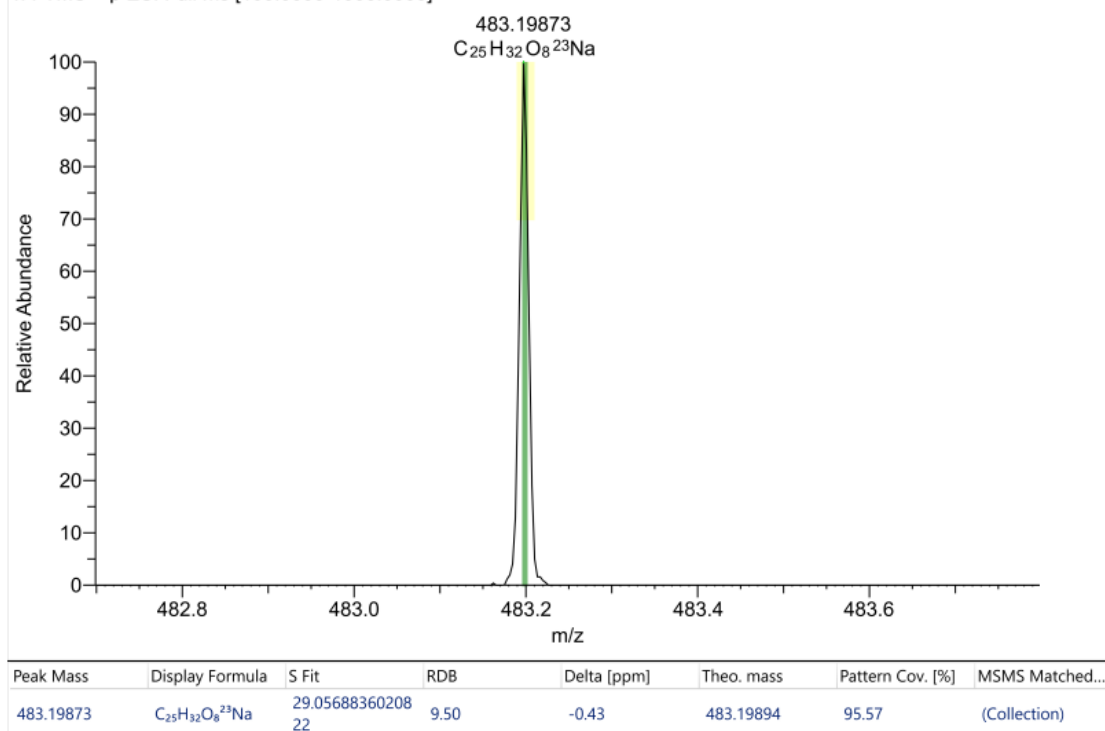

Figure S9. HRESIMS spectrum of **1**

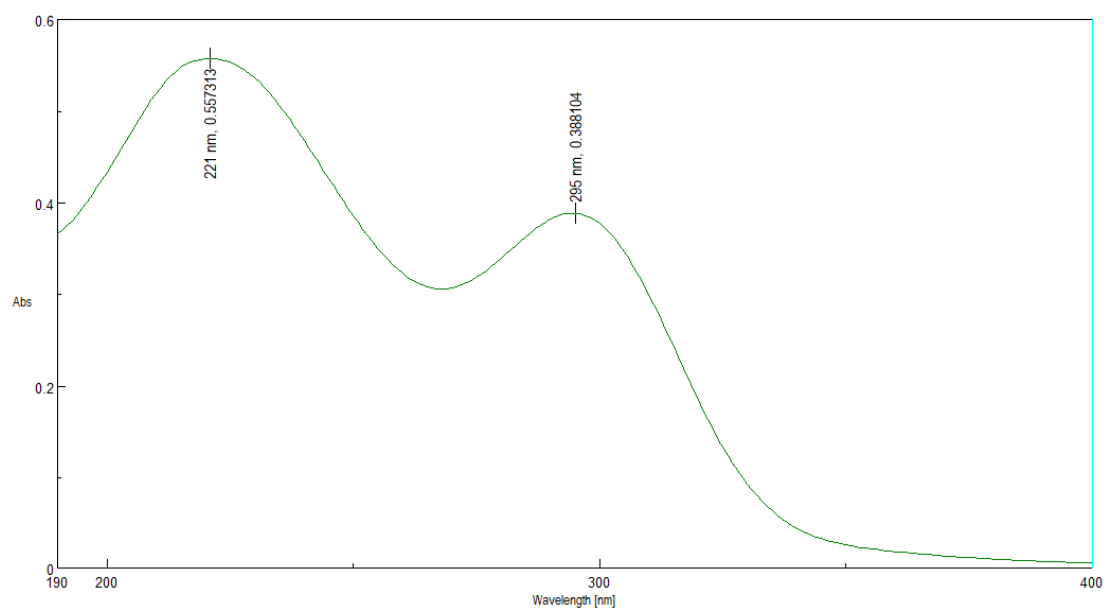

Figure S10. UV spectrum of **1**

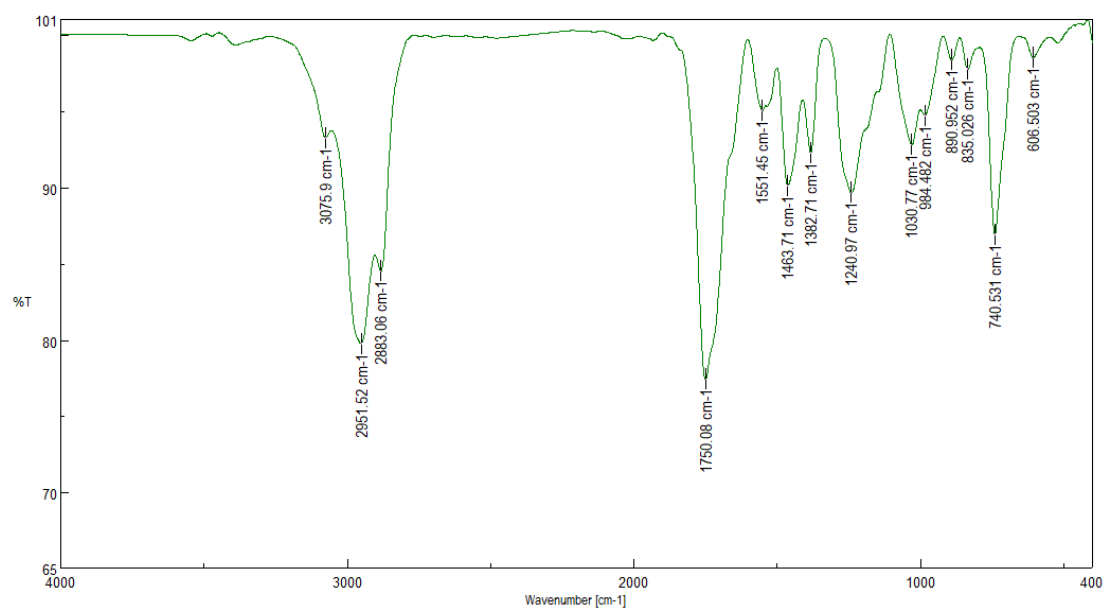

Figure S11. IR spectrum of **1**

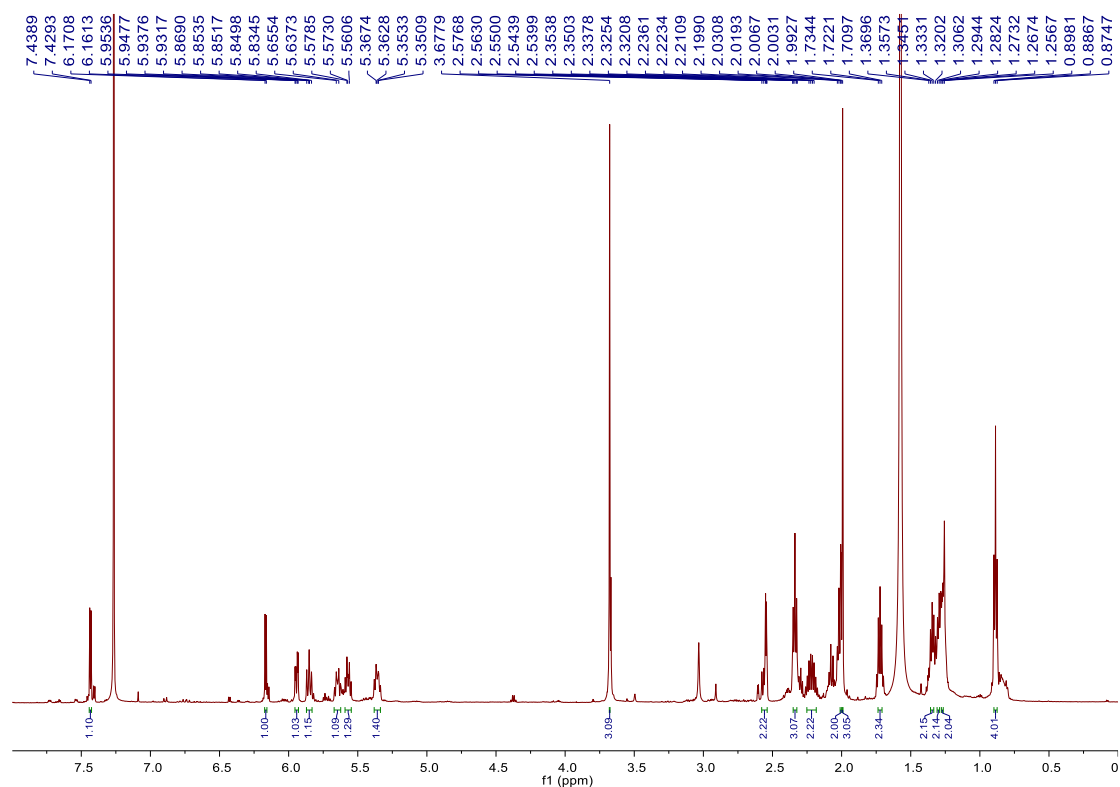

Figure S12. <sup>1</sup>H NMR spectrum of **2** (600 MHz, CDCl<sub>3</sub>)

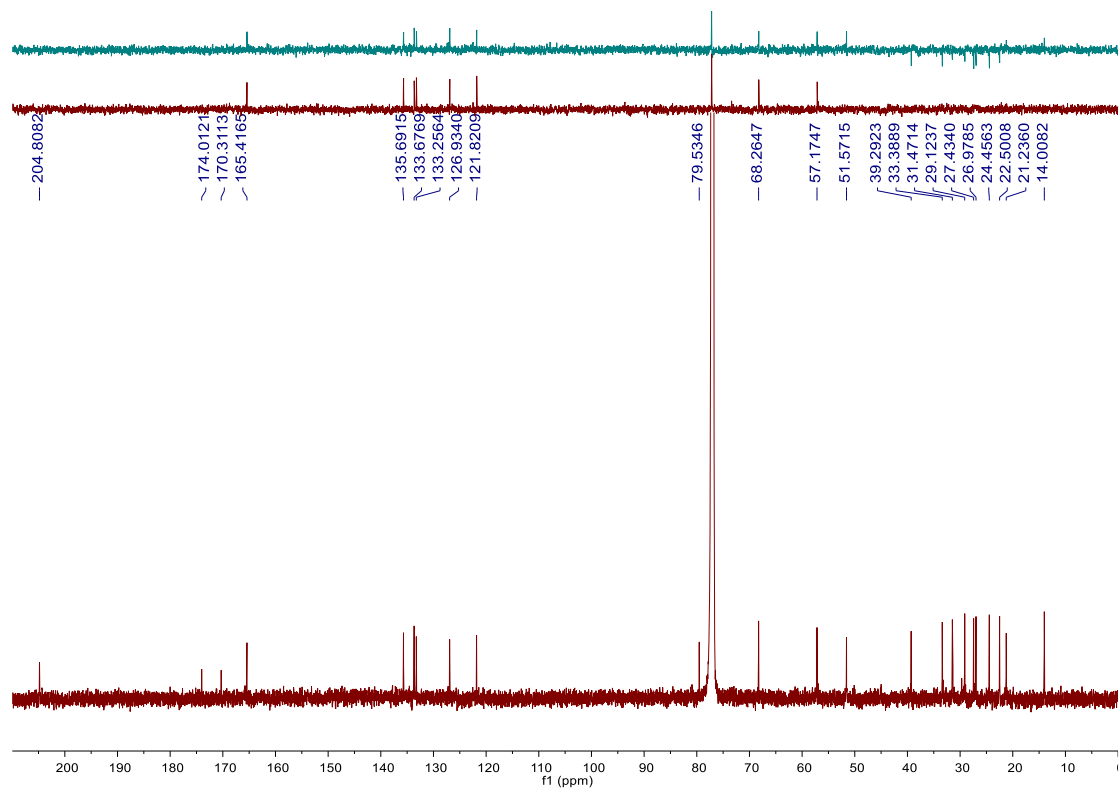

Figure S13. <sup>13</sup>C NMR spectrum of **2** (125 MHz, CDCl<sub>3</sub>)

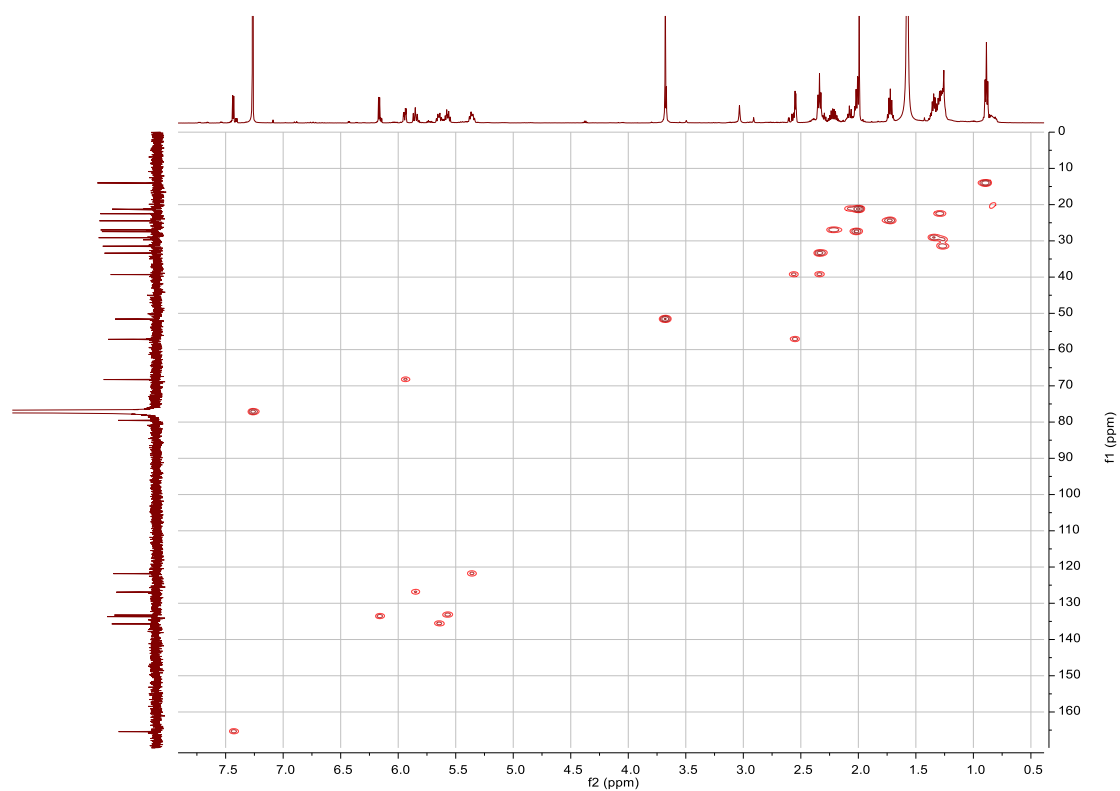

Figure S14. COSY spectrum of **2**

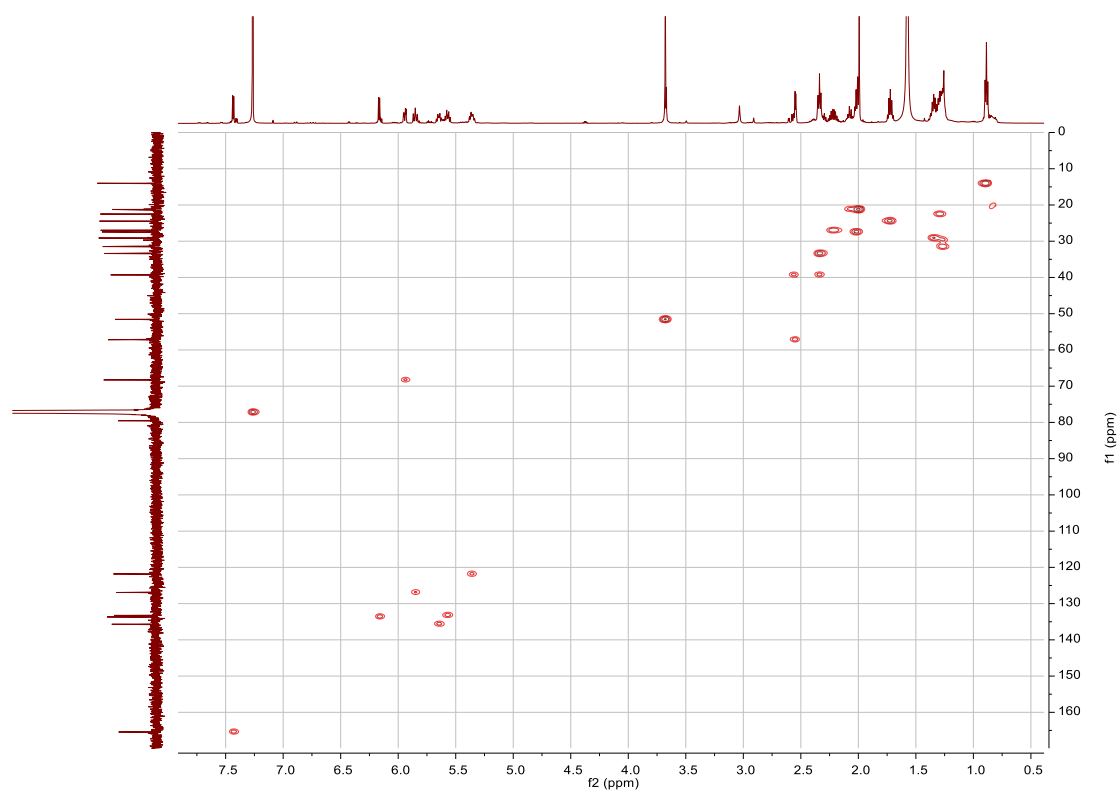

Figure S15. HSQC spectrum of **2**



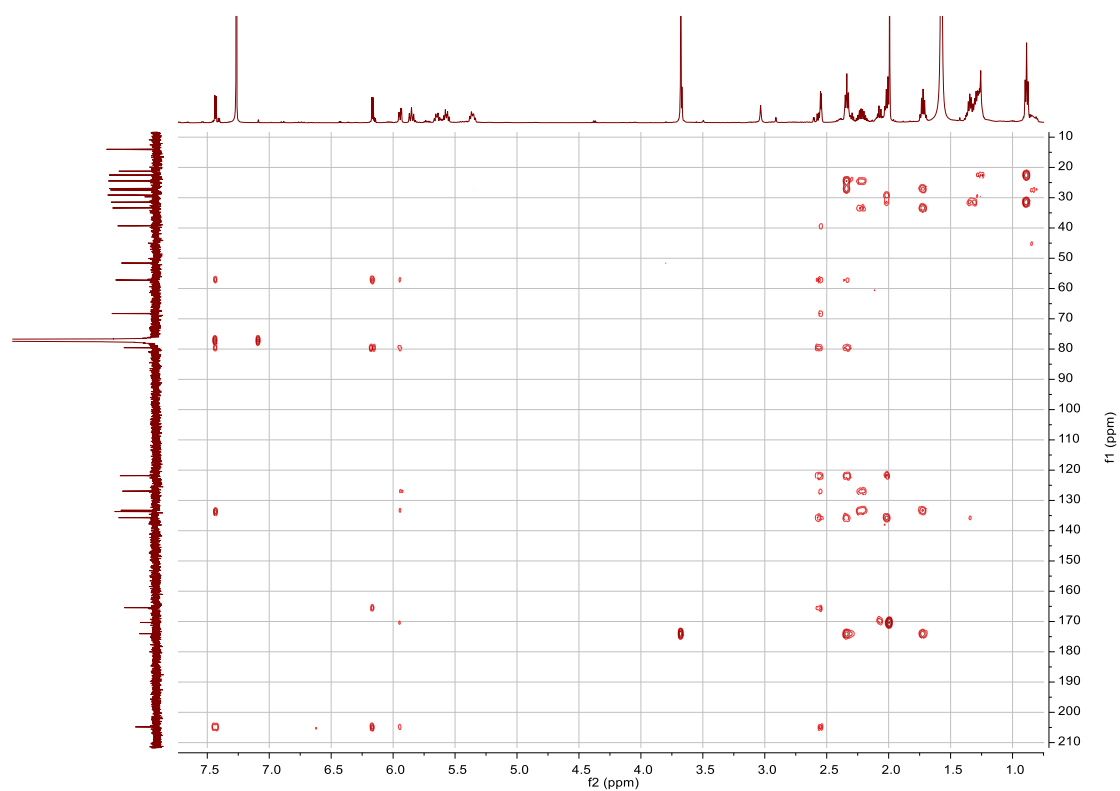

Figure S16. HMBC spectrum of **2**

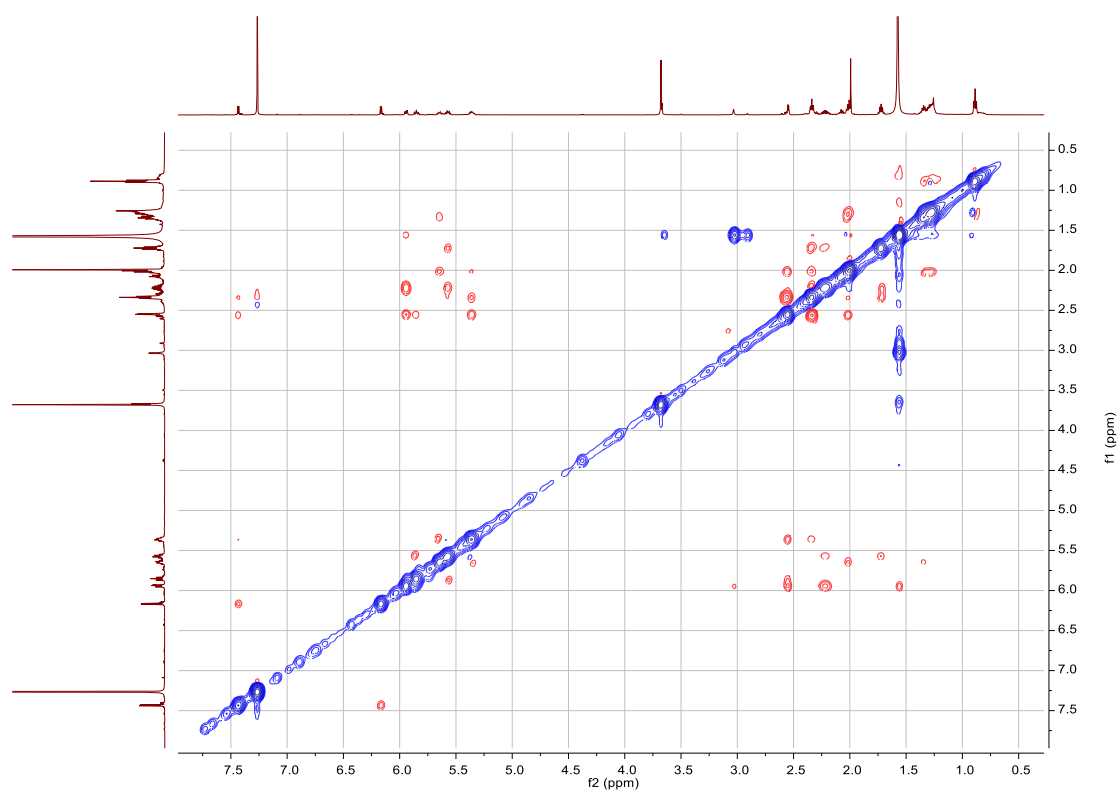

Figure S17. NOESY spectrum of **2**

## Mass Spectrum SmartFormula Report

### Analysis Info

Analysis Name D:\1107\CIACR.d  
Method tune\_wide\_pos\_20220422.m  
Sample Name CI-AC  
Comment ESI Positive

11/8/2022 2:45:15 PM  
Operator: YU HSIAO-CHING  
Instrument: BRUKER micrOTOF-Q

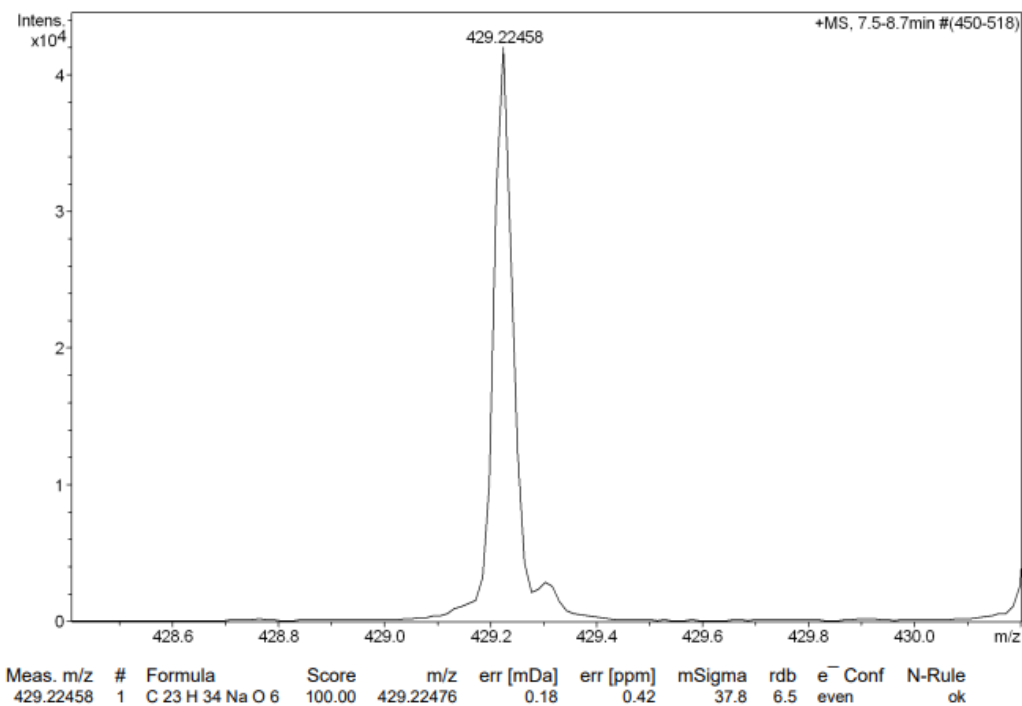

Figure S18. HRESIMS spectrum of **2**

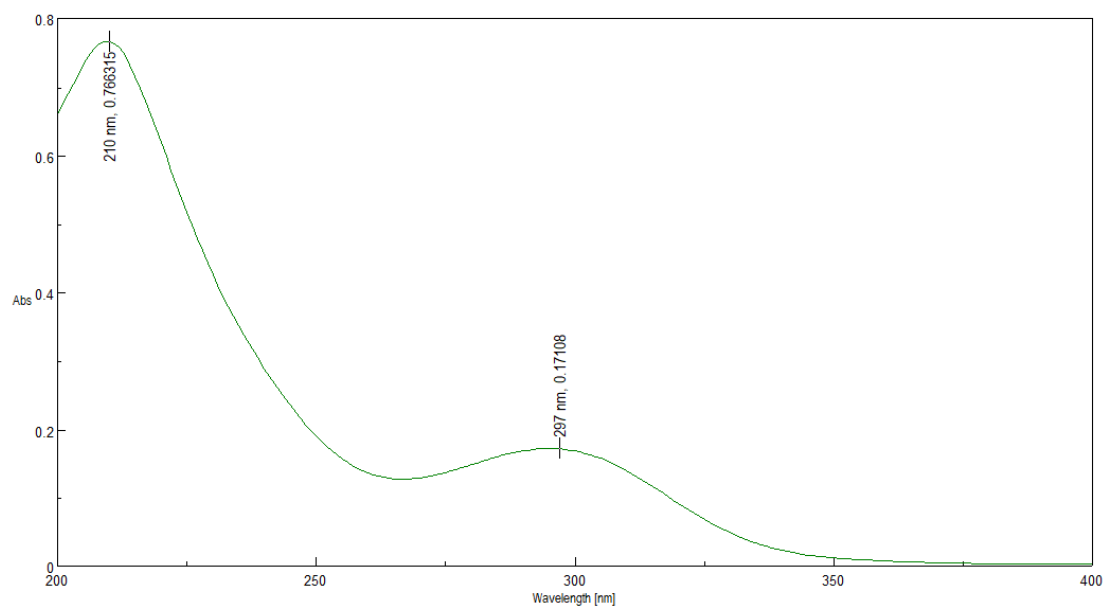

Figure S19. UV spectrum of **2**

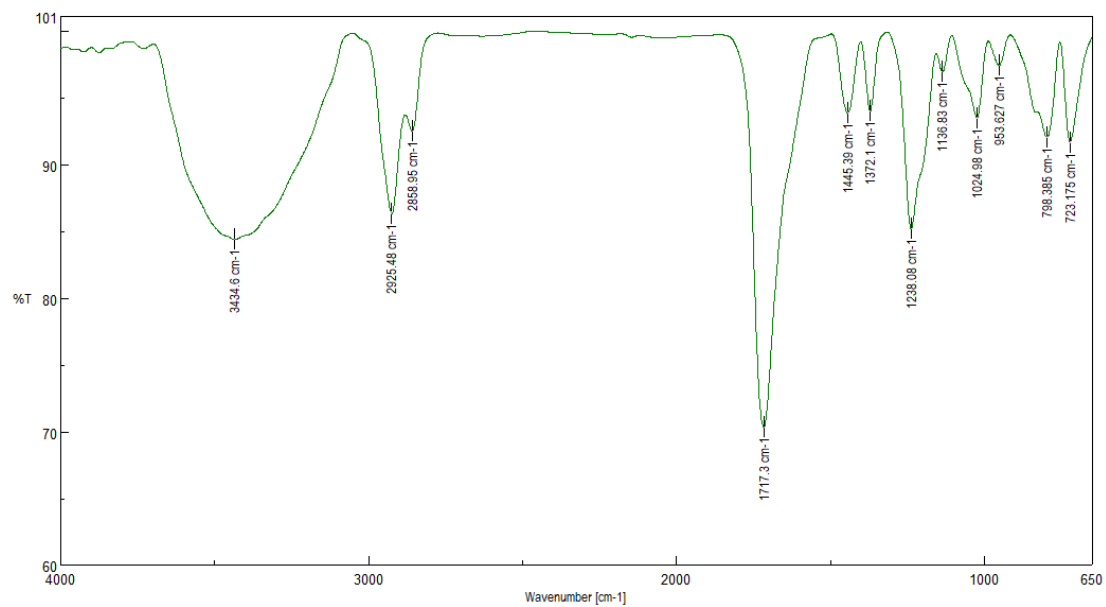

Figure S20. IR spectrum of **2**
